# Supplementary material
Source: publisher figshare collection journal article supplement (https://diabetesjournals.figshare.com/ndownloader/files/25064849)
Supplement: Supplementary file 1 [file 25064849]

## Sheet: Heat maps1_HID21
4.04688	42887					181.448	26587.2
1.5	42887					62.5977	26587.2
1.5	11369.3					62.5977	6907.4
1	11369.3					30.4648	6907.4
1	0					30.4648	1148.15
1	11369.3					11.4609	1148.15
2	11369.3					11.4609	587.335
2	0					4.39062	587.335
2	11369.3					4.39062	178.523
1.5	11369.3					1.75	178.523
1.5	42887					1.75	68.3791
6.59375	42887					1	68.3791
6.59375	29649.6					1	0
4.5	29649.6					1	68.3791
4.5	9196.23					2.5	68.3791
3.5	9196.23					2.5	41.8688
3.5	5545.94					2	41.8688
3	5545.94					2	0
3	0					2	41.8688
3	5545.94					3	41.8688
4	5545.94					3	0
4	0					3	41.8688
4	5545.94					2.5	41.8688
3.5	5545.94					2.5	68.3791
3.5	9196.23					1.75	68.3791
5.5	9196.23					1.75	178.523
5.5	8178.86					7.03125	178.523
5	8178.86					7.03125	164.995
5	0					4.75	164.995
5	8178.86					4.75	67.9495
6	8178.86					4	67.9495
6	0					4	0
6	8178.86					4	67.9495
5.5	8178.86					5.5	67.9495
5.5	9196.23					5.5	44.6516
4.5	9196.23					5	44.6516
4.5	29649.6					5	0
8.6875	29649.6					5	44.6516
8.6875	23065.1					6	44.6516
7.5	23065.1					6	0
7.5	8635.71					6	44.6516
7	8635.71					5.5	44.6516
7	0					5.5	67.9495
7	8635.71					4.75	67.9495
8	8635.71					4.75	164.995
8	0					9.3125	164.995
8	8635.71					9.3125	79.8908
7.5	8635.71					7.75	79.8908
7.5	23065.1					7.75	49.4213
9.875	23065.1					7	49.4213
9.875	14228.8					7	0
9	14228.8					7	49.4213
9	0					8.5	49.4213
9	14228.8					8.5	28.5376
10.75	14228.8					8	28.5376
10.75	9947.9					8	0
10	9947.9					8	28.5376
10	0					9	28.5376
10	9947.9					9	0
11.5	9947.9					9	28.5376
11.5	7498.54					8.5	28.5376
11	7498.54					8.5	49.4213
11	0					7.75	49.4213
11	7498.54					7.75	79.8908
12	7498.54					10.875	79.8908
12	0					10.875	59.7911
12	7498.54					10	59.7911
11.5	7498.54					10	0
11.5	9947.9					10	59.7911
10.75	9947.9					11.75	59.7911
10.75	14228.8					11.75	32.1387
9.875	14228.8					11	32.1387
9.875	23065.1					11	0
8.6875	23065.1					11	32.1387
8.6875	29649.6					12.5	32.1387
6.59375	29649.6					12.5	12.2047
6.59375	42887					12	12.2047
4.04688	42887					12	0
						12	12.2047
						13	12.2047
						13	0
						13	12.2047
						12.5	12.2047
						12.5	32.1387
						11.75	32.1387
						11.75	59.7911
						10.875	59.7911
						10.875	79.8908
						9.3125	79.8908
						9.3125	164.995
						7.03125	164.995
						7.03125	178.523
						4.39062	178.523
						4.39062	587.335
						18.5312	587.335
						18.5312	373.193
						15.5	373.193
						15.5	101.12
						14.5	101.12
						14.5	42.5442
						14	42.5442
						14	0
						14	42.5442
						15	42.5442
						15	0
						15	42.5442
						14.5	42.5442
						14.5	101.12
						16.5	101.12
						16.5	48.9146
						16	48.9146
						16	0
						16	48.9146
						17	48.9146
						17	0
						17	48.9146
						16.5	48.9146
						16.5	101.12
						15.5	101.12
						15.5	373.193
						21.5625	373.193
						21.5625	211.08
						19.5	211.08
						19.5	67.5875
						18.5	67.5875
						18.5	29.7351
						18	29.7351
						18	0
						18	29.7351
						19	29.7351
						19	0
						19	29.7351
						18.5	29.7351
						18.5	67.5875
						20.5	67.5875
						20.5	41.1359
						20	41.1359
						20	0
						20	41.1359
						21	41.1359
						21	0
						21	41.1359
						20.5	41.1359
						20.5	67.5875
						19.5	67.5875
						19.5	211.08
						23.625	211.08
						23.625	71.25
						22.5	71.25
						22.5	33.2456
						22	33.2456
						22	0
						22	33.2456
						23	33.2456
						23	0
						23	33.2456
						22.5	33.2456
						22.5	71.25
						24.75	71.25
						24.75	58.1699
						24	58.1699
						24	0
						24	58.1699
						25.5	58.1699
						25.5	35.479
						25	35.479
						25	0
						25	35.479
						26	35.479
						26	0
						26	35.479
						25.5	35.479
						25.5	58.1699
						24.75	58.1699
						24.75	71.25
						23.625	71.25
						23.625	211.08
						21.5625	211.08
						21.5625	373.193
						18.5312	373.193
						18.5312	587.335
						11.4609	587.335
						11.4609	1148.15
						49.4688	1148.15
						49.4688	959.508
						38.3594	959.508
						38.3594	387.633
						31.3438	387.633
						31.3438	166.927
						28.625	166.927
						28.625	67.6549
						27.5	67.6549
						27.5	16.79
						27	16.79
						27	0
						27	16.79
						28	16.79
						28	0
						28	16.79
						27.5	16.79
						27.5	67.6549
						29.75	67.6549
						29.75	37.8699
						29	37.8699
						29	0
						29	37.8699
						30.5	37.8699
						30.5	32.7001
						30	32.7001
						30	0
						30	32.7001
						31	32.7001
						31	0
						31	32.7001
						30.5	32.7001
						30.5	37.8699
						29.75	37.8699
						29.75	67.6549
						28.625	67.6549
						28.625	166.927
						34.0625	166.927
						34.0625	117.711
						32.5	117.711
						32.5	45.3061
						32	45.3061
						32	0
						32	45.3061
						33	45.3061
						33	0
						33	45.3061
						32.5	45.3061
						32.5	117.711
						35.625	117.711
						35.625	86.3855
						34.5	86.3855
						34.5	17.531
						34	17.531
						34	0
						34	17.531
						35	17.531
						35	0
						35	17.531
						34.5	17.531
						34.5	86.3855
						36.75	86.3855
						36.75	72.1386
						36	72.1386
						36	0
						36	72.1386
						37.5	72.1386
						37.5	29.3506
						37	29.3506
						37	0
						37	29.3506
						38	29.3506
						38	0
						38	29.3506
						37.5	29.3506
						37.5	72.1386
						36.75	72.1386
						36.75	86.3855
						35.625	86.3855
						35.625	117.711
						34.0625	117.711
						34.0625	166.927
						31.3438	166.927
						31.3438	387.633
						45.375	387.633
						45.375	243.903
						41.6875	243.903
						41.6875	90.3973
						39.75	90.3973
						39.75	38.6381
						39	38.6381
						39	0
						39	38.6381
						40.5	38.6381
						40.5	20.1593
						40	20.1593
						40	0
						40	20.1593
						41	20.1593
						41	0
						41	20.1593
						40.5	20.1593
						40.5	38.6381
						39.75	38.6381
						39.75	90.3973
						43.625	90.3973
						43.625	62.3729
						42.5	62.3729
						42.5	23.7294
						42	23.7294
						42	0
						42	23.7294
						43	23.7294
						43	0
						43	23.7294
						42.5	23.7294
						42.5	62.3729
						44.75	62.3729
						44.75	27.2291
						44	27.2291
						44	0
						44	27.2291
						45.5	27.2291
						45.5	13.9078
						45	13.9078
						45	0
						45	13.9078
						46	13.9078
						46	0
						46	13.9078
						45.5	13.9078
						45.5	27.2291
						44.75	27.2291
						44.75	62.3729
						43.625	62.3729
						43.625	90.3973
						41.6875	90.3973
						41.6875	243.903
						49.0625	243.903
						49.0625	174.27
						47.5	174.27
						47.5	62.3486
						47	62.3486
						47	0
						47	62.3486
						48	62.3486
						48	0
						48	62.3486
						47.5	62.3486
						47.5	174.27
						50.625	174.27
						50.625	113.297
						49.5	113.297
						49.5	43.975
						49	43.975
						49	0
						49	43.975
						50	43.975
						50	0
						50	43.975
						49.5	43.975
						49.5	113.297
						51.75	113.297
						51.75	68.7485
						51	68.7485
						51	0
						51	68.7485
						52.5	68.7485
						52.5	28.333
						52	28.333
						52	0
						52	28.333
						53	28.333
						53	0
						53	28.333
						52.5	28.333
						52.5	68.7485
						51.75	68.7485
						51.75	113.297
						50.625	113.297
						50.625	174.27
						49.0625	174.27
						49.0625	243.903
						45.375	243.903
						45.375	387.633
						38.3594	387.633
						38.3594	959.508
						60.5781	959.508
						60.5781	426.384
						56.0625	426.384
						56.0625	110.526
						54.5	110.526
						54.5	40.0266
						54	40.0266
						54	0
						54	40.0266
						55	40.0266
						55	0
						55	40.0266
						54.5	40.0266
						54.5	110.526
						57.625	110.526
						57.625	71.1966
						56.5	71.1966
						56.5	27.2178
						56	27.2178
						56	0
						56	27.2178
						57	27.2178
						57	0
						57	27.2178
						56.5	27.2178
						56.5	71.1966
						58.75	71.1966
						58.75	50.4102
						58	50.4102
						58	0
						58	50.4102
						59.5	50.4102
						59.5	19.5127
						59	19.5127
						59	0
						59	19.5127
						60	19.5127
						60	0
						60	19.5127
						59.5	19.5127
						59.5	50.4102
						58.75	50.4102
						58.75	71.1966
						57.625	71.1966
						57.625	110.526
						56.0625	110.526
						56.0625	426.384
						65.0938	426.384
						65.0938	144.57
						62.5	144.57
						62.5	47.8971
						61.5	47.8971
						61.5	22.3953
						61	22.3953
						61	0
						61	22.3953
						62	22.3953
						62	0
						62	22.3953
						61.5	22.3953
						61.5	47.8971
						63.5	47.8971
						63.5	30.7535
						63	30.7535
						63	0
						63	30.7535
						64	30.7535
						64	0
						64	30.7535
						63.5	30.7535
						63.5	47.8971
						62.5	47.8971
						62.5	144.57
						67.6875	144.57
						67.6875	129.927
						65.75	129.927
						65.75	30.7417
						65	30.7417
						65	0
						65	30.7417
						66.5	30.7417
						66.5	28.1794
						66	28.1794
						66	0
						66	28.1794
						67	28.1794
						67	0
						67	28.1794
						66.5	28.1794
						66.5	30.7417
						65.75	30.7417
						65.75	129.927
						69.625	129.927
						69.625	76.4741
						68.5	76.4741
						68.5	22.2742
						68	22.2742
						68	0
						68	22.2742
						69	22.2742
						69	0
						69	22.2742
						68.5	22.2742
						68.5	76.4741
						70.75	76.4741
						70.75	45.1276
						70	45.1276
						70	0
						70	45.1276
						71.5	45.1276
						71.5	10.8427
						71	10.8427
						71	0
						71	10.8427
						72	10.8427
						72	0
						72	10.8427
						71.5	10.8427
						71.5	45.1276
						70.75	45.1276
						70.75	76.4741
						69.625	76.4741
						69.625	129.927
						67.6875	129.927
						67.6875	144.57
						65.0938	144.57
						65.0938	426.384
						60.5781	426.384
						60.5781	959.508
						49.4688	959.508
						49.4688	1148.15
						30.4648	1148.15
						30.4648	6907.4
						94.7305	6907.4
						94.7305	1655.48
						83.8594	1655.48
						83.8594	582.527
						78.1562	582.527
						78.1562	300.63
						75	300.63
						75	90.9699
						73.5	90.9699
						73.5	39.5591
						73	39.5591
						73	0
						73	39.5591
						74	39.5591
						74	0
						74	39.5591
						73.5	39.5591
						73.5	90.9699
						76.5	90.9699
						76.5	63.9635
						75.5	63.9635
						75.5	12.763
						75	12.763
						75	0
						75	12.763
						76	12.763
						76	0
						76	12.763
						75.5	12.763
						75.5	63.9635
						77.5	63.9635
						77.5	25.1283
						77	25.1283
						77	0
						77	25.1283
						78	25.1283
						78	0
						78	25.1283
						77.5	25.1283
						77.5	63.9635
						76.5	63.9635
						76.5	90.9699
						75	90.9699
						75	300.63
						81.3125	300.63
						81.3125	150.586
						79.5	150.586
						79.5	39.9485
						79	39.9485
						79	0
						79	39.9485
						80	39.9485
						80	0
						80	39.9485
						79.5	39.9485
						79.5	150.586
						83.125	150.586
						83.125	106.777
						81.75	106.777
						81.75	56.5856
						81	56.5856
						81	0
						81	56.5856
						82.5	56.5856
						82.5	36.587
						82	36.587
						82	0
						82	36.587
						83	36.587
						83	0
						83	36.587
						82.5	36.587
						82.5	56.5856
						81.75	56.5856
						81.75	106.777
						84.5	106.777
						84.5	59.5592
						84	59.5592
						84	0
						84	59.5592
						85	59.5592
						85	0
						85	59.5592
						84.5	59.5592
						84.5	106.777
						83.125	106.777
						83.125	150.586
						81.3125	150.586
						81.3125	300.63
						78.1562	300.63
						78.1562	582.527
						89.5625	582.527
						89.5625	373.189
						87.5	373.189
						87.5	124.711
						86.5	124.711
						86.5	67.1207
						86	67.1207
						86	0
						86	67.1207
						87	67.1207
						87	0
						87	67.1207
						86.5	67.1207
						86.5	124.711
						88.5	124.711
						88.5	81.8661
						88	81.8661
						88	0
						88	81.8661
						89	81.8661
						89	0
						89	81.8661
						88.5	81.8661
						88.5	124.711
						87.5	124.711
						87.5	373.189
						91.625	373.189
						91.625	152.14
						90.5	152.14
						90.5	63.1076
						90	63.1076
						90	0
						90	63.1076
						91	63.1076
						91	0
						91	63.1076
						90.5	63.1076
						90.5	152.14
						92.75	152.14
						92.75	81.2322
						92	81.2322
						92	0
						92	81.2322
						93.5	81.2322
						93.5	58.099
						93	58.099
						93	0
						93	58.099
						94	58.099
						94	0
						94	58.099
						93.5	58.099
						93.5	81.2322
						92.75	81.2322
						92.75	152.14
						91.625	152.14
						91.625	373.189
						89.5625	373.189
						89.5625	582.527
						83.8594	582.527
						83.8594	1655.48
						105.602	1655.48
						105.602	953.659
						98.7656	953.659
						98.7656	244.279
						96.5	244.279
						96.5	108.556
						95.5	108.556
						95.5	46.44
						95	46.44
						95	0
						95	46.44
						96	46.44
						96	0
						96	46.44
						95.5	46.44
						95.5	108.556
						97.5	108.556
						97.5	67.1856
						97	67.1856
						97	0
						97	67.1856
						98	67.1856
						98	0
						98	67.1856
						97.5	67.1856
						97.5	108.556
						96.5	108.556
						96.5	244.279
						101.031	244.279
						101.031	184.39
						99.5	184.39
						99.5	60.6671
						99	60.6671
						99	0
						99	60.6671
						100	60.6671
						100	0
						100	60.6671
						99.5	60.6671
						99.5	184.39
						102.562	184.39
						102.562	99.3246
						101	99.3246
						101	0
						101	99.3246
						104.125	99.3246
						104.125	75.2246
						102.75	75.2246
						102.75	25.0915
						102	25.0915
						102	0
						102	25.0915
						103.5	25.0915
						103.5	20.8719
						103	20.8719
						103	0
						103	20.8719
						104	20.8719
						104	0
						104	20.8719
						103.5	20.8719
						103.5	25.0915
						102.75	25.0915
						102.75	75.2246
						105.5	75.2246
						105.5	52.5573
						105	52.5573
						105	0
						105	52.5573
						106	52.5573
						106	0
						106	52.5573
						105.5	52.5573
						105.5	75.2246
						104.125	75.2246
						104.125	99.3246
						102.562	99.3246
						102.562	184.39
						101.031	184.39
						101.031	244.279
						98.7656	244.279
						98.7656	953.659
						112.438	953.659
						112.438	277.4
						109.125	277.4
						109.125	92.7801
						107.75	92.7801
						107.75	46.8365
						107	46.8365
						107	0
						107	46.8365
						108.5	46.8365
						108.5	19.3299
						108	19.3299
						108	0
						108	19.3299
						109	19.3299
						109	0
						109	19.3299
						108.5	19.3299
						108.5	46.8365
						107.75	46.8365
						107.75	92.7801
						110.5	92.7801
						110.5	63.3263
						110	63.3263
						110	0
						110	63.3263
						111	63.3263
						111	0
						111	63.3263
						110.5	63.3263
						110.5	92.7801
						109.125	92.7801
						109.125	277.4
						115.75	277.4
						115.75	227.023
						113.5	227.023
						113.5	74.6168
						112.5	74.6168
						112.5	36.2081
						112	36.2081
						112	0
						112	36.2081
						113	36.2081
						113	0
						113	36.2081
						112.5	36.2081
						112.5	74.6168
						114.5	74.6168
						114.5	52.6928
						114	52.6928
						114	0
						114	52.6928
						115	52.6928
						115	0
						115	52.6928
						114.5	52.6928
						114.5	74.6168
						113.5	74.6168
						113.5	227.023
						118	227.023
						118	116.751
						116.5	116.751
						116.5	41.3196
						116	41.3196
						116	0
						116	41.3196
						117	41.3196
						117	0
						117	41.3196
						116.5	41.3196
						116.5	116.751
						119.5	116.751
						119.5	88.5429
						118.5	88.5429
						118.5	39.65
						118	39.65
						118	0
						118	39.65
						119	39.65
						119	0
						119	39.65
						118.5	39.65
						118.5	88.5429
						120.5	88.5429
						120.5	53.9505
						120	53.9505
						120	0
						120	53.9505
						121	53.9505
						121	0
						121	53.9505
						120.5	53.9505
						120.5	88.5429
						119.5	88.5429
						119.5	116.751
						118	116.751
						118	227.023
						115.75	227.023
						115.75	277.4
						112.438	277.4
						112.438	953.659
						105.602	953.659
						105.602	1655.48
						94.7305	1655.48
						94.7305	6907.4
						62.5977	6907.4
						62.5977	26587.2
						300.298	26587.2
						300.298	14365.1
						199.056	14365.1
						199.056	5505.11
						152.248	5505.11
						152.248	1513.34
						133.594	1513.34
						133.594	640.286
						126.375	640.286
						126.375	131.796
						124	131.796
						124	46.2045
						122.5	46.2045
						122.5	16.7748
						122	16.7748
						122	0
						122	16.7748
						123	16.7748
						123	0
						123	16.7748
						122.5	16.7748
						122.5	46.2045
						125.5	46.2045
						125.5	28.7293
						124.5	28.7293
						124.5	10.8637
						124	10.8637
						124	0
						124	10.8637
						125	10.8637
						125	0
						125	10.8637
						124.5	10.8637
						124.5	28.7293
						126.5	28.7293
						126.5	18.4026
						126	18.4026
						126	0
						126	18.4026
						127	18.4026
						127	0
						127	18.4026
						126.5	18.4026
						126.5	28.7293
						125.5	28.7293
						125.5	46.2045
						124	46.2045
						124	131.796
						128.75	131.796
						128.75	56.7484
						128	56.7484
						128	0
						128	56.7484
						129.5	56.7484
						129.5	21.9056
						129	21.9056
						129	0
						129	21.9056
						130	21.9056
						130	0
						130	21.9056
						129.5	21.9056
						129.5	56.7484
						128.75	56.7484
						128.75	131.796
						126.375	131.796
						126.375	640.286
						140.812	640.286
						140.812	179.922
						134.031	179.922
						134.031	99.5928
						131.75	99.5928
						131.75	42.048
						131	42.048
						131	0
						131	42.048
						132.5	42.048
						132.5	28.8609
						132	28.8609
						132	0
						132	28.8609
						133	28.8609
						133	0
						133	28.8609
						132.5	28.8609
						132.5	42.048
						131.75	42.048
						131.75	99.5928
						136.312	99.5928
						136.312	74.8866
						134.75	74.8866
						134.75	34.9661
						134	34.9661
						134	0
						134	34.9661
						135.5	34.9661
						135.5	25.0541
						135	25.0541
						135	0
						135	25.0541
						136	25.0541
						136	0
						136	25.0541
						135.5	25.0541
						135.5	34.9661
						134.75	34.9661
						134.75	74.8866
						137.875	74.8866
						137.875	41.8792
						137	41.8792
						137	0
						137	41.8792
						138.75	41.8792
						138.75	34.262
						138	34.262
						138	0
						138	34.262
						139.5	34.262
						139.5	13.0247
						139	13.0247
						139	0
						139	13.0247
						140	13.0247
						140	0
						140	13.0247
						139.5	13.0247
						139.5	34.262
						138.75	34.262
						138.75	41.8792
						137.875	41.8792
						137.875	74.8866
						136.312	74.8866
						136.312	99.5928
						134.031	99.5928
						134.031	179.922
						147.594	179.922
						147.594	109.964
						144.688	109.964
						144.688	40.7393
						142.625	40.7393
						142.625	23.0696
						141.5	23.0696
						141.5	13.2507
						141	13.2507
						141	0
						141	13.2507
						142	13.2507
						142	0
						142	13.2507
						141.5	13.2507
						141.5	23.0696
						143.75	23.0696
						143.75	16.9862
						143	16.9862
						143	0
						143	16.9862
						144.5	16.9862
						144.5	5.34104
						144	5.34104
						144	0
						144	5.34104
						145	5.34104
						145	0
						145	5.34104
						144.5	5.34104
						144.5	16.9862
						143.75	16.9862
						143.75	23.0696
						142.625	23.0696
						142.625	40.7393
						146.75	40.7393
						146.75	26.1389
						146	26.1389
						146	0
						146	26.1389
						147.5	26.1389
						147.5	21.2858
						147	21.2858
						147	0
						147	21.2858
						148	21.2858
						148	0
						148	21.2858
						147.5	21.2858
						147.5	26.1389
						146.75	26.1389
						146.75	40.7393
						144.688	40.7393
						144.688	109.964
						150.5	109.964
						150.5	62.617
						149.5	62.617
						149.5	27.707
						149	27.707
						149	0
						149	27.707
						150	27.707
						150	0
						150	27.707
						149.5	27.707
						149.5	62.617
						151.5	62.617
						151.5	32.3812
						151	32.3812
						151	0
						151	32.3812
						152	32.3812
						152	0
						152	32.3812
						151.5	32.3812
						151.5	62.617
						150.5	62.617
						150.5	109.964
						147.594	109.964
						147.594	179.922
						140.812	179.922
						140.812	640.286
						133.594	640.286
						133.594	1513.34
						170.902	1513.34
						170.902	875.599
						158.25	875.599
						158.25	478.999
						154.625	478.999
						154.625	166.475
						153.5	166.475
						153.5	42.7473
						153	42.7473
						153	0
						153	42.7473
						154	42.7473
						154	0
						154	42.7473
						153.5	42.7473
						153.5	166.475
						155.75	166.475
						155.75	92.0434
						155	92.0434
						155	0
						155	92.0434
						156.5	92.0434
						156.5	51.1213
						156	51.1213
						156	0
						156	51.1213
						157	51.1213
						157	0
						157	51.1213
						156.5	51.1213
						156.5	92.0434
						155.75	92.0434
						155.75	166.475
						154.625	166.475
						154.625	478.999
						161.875	478.999
						161.875	168.377
						159.5	168.377
						159.5	84.1399
						158.5	84.1399
						158.5	48.1186
						158	48.1186
						158	0
						158	48.1186
						159	48.1186
						159	0
						159	48.1186
						158.5	48.1186
						158.5	84.1399
						160.5	84.1399
						160.5	50.8696
						160	50.8696
						160	0
						160	50.8696
						161	50.8696
						161	0
						161	50.8696
						160.5	50.8696
						160.5	84.1399
						159.5	84.1399
						159.5	168.377
						164.25	168.377
						164.25	99.0126
						162.75	99.0126
						162.75	43.0167
						162	43.0167
						162	0
						162	43.0167
						163.5	43.0167
						163.5	30.9223
						163	30.9223
						163	0
						163	30.9223
						164	30.9223
						164	0
						164	30.9223
						163.5	30.9223
						163.5	43.0167
						162.75	43.0167
						162.75	99.0126
						165.75	99.0126
						165.75	76.6854
						165	76.6854
						165	0
						165	76.6854
						166.5	76.6854
						166.5	33.392
						166	33.392
						166	0
						166	33.392
						167	33.392
						167	0
						167	33.392
						166.5	33.392
						166.5	76.6854
						165.75	76.6854
						165.75	99.0126
						164.25	99.0126
						164.25	168.377
						161.875	168.377
						161.875	478.999
						158.25	478.999
						158.25	875.599
						183.555	875.599
						183.555	650.949
						173.5	650.949
						173.5	253.169
						169.625	253.169
						169.625	121.559
						168.5	121.559
						168.5	47.0733
						168	47.0733
						168	0
						168	47.0733
						169	47.0733
						169	0
						169	47.0733
						168.5	47.0733
						168.5	121.559
						170.75	121.559
						170.75	77.7115
						170	77.7115
						170	0
						170	77.7115
						171.5	77.7115
						171.5	61.2069
						171	61.2069
						171	0
						171	61.2069
						172	61.2069
						172	0
						172	61.2069
						171.5	61.2069
						171.5	77.7115
						170.75	77.7115
						170.75	121.559
						169.625	121.559
						169.625	253.169
						177.375	253.169
						177.375	156.299
						175	156.299
						175	55.5543
						173.5	55.5543
						173.5	18.5036
						173	18.5036
						173	0
						173	18.5036
						174	18.5036
						174	0
						174	18.5036
						173.5	18.5036
						173.5	55.5543
						176.5	55.5543
						176.5	33.2235
						175.5	33.2235
						175.5	12.7933
						175	12.7933
						175	0
						175	12.7933
						176	12.7933
						176	0
						176	12.7933
						175.5	12.7933
						175.5	33.2235
						177.5	33.2235
						177.5	16.4681
						177	16.4681
						177	0
						177	16.4681
						178	16.4681
						178	0
						178	16.4681
						177.5	16.4681
						177.5	33.2235
						176.5	33.2235
						176.5	55.5543
						175	55.5543
						175	156.299
						179.75	156.299
						179.75	67.2899
						179	67.2899
						179	0
						179	67.2899
						180.5	67.2899
						180.5	49.0833
						180	49.0833
						180	0
						180	49.0833
						181	49.0833
						181	0
						181	49.0833
						180.5	49.0833
						180.5	67.2899
						179.75	67.2899
						179.75	156.299
						177.375	156.299
						177.375	253.169
						173.5	253.169
						173.5	650.949
						193.609	650.949
						193.609	344.581
						185.125	344.581
						185.125	108.496
						183.5	108.496
						183.5	58.6314
						182.5	58.6314
						182.5	15.9777
						182	15.9777
						182	0
						182	15.9777
						183	15.9777
						183	0
						183	15.9777
						182.5	15.9777
						182.5	58.6314
						184.5	58.6314
						184.5	28.3085
						184	28.3085
						184	0
						184	28.3085
						185	28.3085
						185	0
						185	28.3085
						184.5	28.3085
						184.5	58.6314
						183.5	58.6314
						183.5	108.496
						186.75	108.496
						186.75	67.758
						186	67.758
						186	0
						186	67.758
						187.5	67.758
						187.5	48.505
						187	48.505
						187	0
						187	48.505
						188	48.505
						188	0
						188	48.505
						187.5	48.505
						187.5	67.758
						186.75	67.758
						186.75	108.496
						185.125	108.496
						185.125	344.581
						202.094	344.581
						202.094	280.156
						194.531	280.156
						194.531	143.386
						190.625	143.386
						190.625	62.2699
						189.5	62.2699
						189.5	25.338
						189	25.338
						189	0
						189	25.338
						190	25.338
						190	0
						190	25.338
						189.5	25.338
						189.5	62.2699
						191.75	62.2699
						191.75	34.6099
						191	34.6099
						191	0
						191	34.6099
						192.5	34.6099
						192.5	23.6277
						192	23.6277
						192	0
						192	23.6277
						193	23.6277
						193	0
						193	23.6277
						192.5	23.6277
						192.5	34.6099
						191.75	34.6099
						191.75	62.2699
						190.625	62.2699
						190.625	143.386
						198.438	143.386
						198.438	130.376
						195.625	130.376
						195.625	56.5026
						194.5	56.5026
						194.5	17.7861
						194	17.7861
						194	0
						194	17.7861
						195	17.7861
						195	0
						195	17.7861
						194.5	17.7861
						194.5	56.5026
						196.75	56.5026
						196.75	27.2977
						196	27.2977
						196	0
						196	27.2977
						197.5	27.2977
						197.5	16.6886
						197	16.6886
						197	0
						197	16.6886
						198	16.6886
						198	0
						198	16.6886
						197.5	16.6886
						197.5	27.2977
						196.75	27.2977
						196.75	56.5026
						195.625	56.5026
						195.625	130.376
						201.25	130.376
						201.25	66.0198
						199.75	66.0198
						199.75	22.6531
						199	22.6531
						199	0
						199	22.6531
						200.5	22.6531
						200.5	15.625
						200	15.625
						200	0
						200	15.625
						201	15.625
						201	0
						201	15.625
						200.5	15.625
						200.5	22.6531
						199.75	22.6531
						199.75	66.0198
						202.75	66.0198
						202.75	28.8946
						202	28.8946
						202	0
						202	28.8946
						203.5	28.8946
						203.5	14.5614
						203	14.5614
						203	0
						203	14.5614
						204	14.5614
						204	0
						204	14.5614
						203.5	14.5614
						203.5	28.8946
						202.75	28.8946
						202.75	66.0198
						201.25	66.0198
						201.25	130.376
						198.438	130.376
						198.438	143.386
						194.531	143.386
						194.531	280.156
						209.656	280.156
						209.656	152.266
						206.688	152.266
						206.688	42.8954
						205.5	42.8954
						205.5	19.0284
						205	19.0284
						205	0
						205	19.0284
						206	19.0284
						206	0
						206	19.0284
						205.5	19.0284
						205.5	42.8954
						207.875	42.8954
						207.875	37.5678
						207	37.5678
						207	0
						207	37.5678
						208.75	37.5678
						208.75	27.2729
						208	27.2729
						208	0
						208	27.2729
						209.5	27.2729
						209.5	4.493
						209	4.493
						209	0
						209	4.493
						210	4.493
						210	0
						210	4.493
						209.5	4.493
						209.5	27.2729
						208.75	27.2729
						208.75	37.5678
						207.875	37.5678
						207.875	42.8954
						206.688	42.8954
						206.688	152.266
						212.625	152.266
						212.625	47.8155
						211.5	47.8155
						211.5	19.0296
						211	19.0296
						211	0
						211	19.0296
						212	19.0296
						212	0
						212	19.0296
						211.5	19.0296
						211.5	47.8155
						213.75	47.8155
						213.75	30.2026
						213	30.2026
						213	0
						213	30.2026
						214.5	30.2026
						214.5	5.76155
						214	5.76155
						214	0
						214	5.76155
						215	5.76155
						215	0
						215	5.76155
						214.5	5.76155
						214.5	30.2026
						213.75	30.2026
						213.75	47.8155
						212.625	47.8155
						212.625	152.266
						209.656	152.266
						209.656	280.156
						202.094	280.156
						202.094	344.581
						193.609	344.581
						193.609	650.949
						183.555	650.949
						183.555	875.599
						170.902	875.599
						170.902	1513.34
						152.248	1513.34
						152.248	5505.11
						245.863	5505.11
						245.863	3226.27
						226.031	3226.27
						226.031	778.289
						219.5	778.289
						219.5	287.978
						217.5	287.978
						217.5	98.3992
						216.5	98.3992
						216.5	53.9839
						216	53.9839
						216	0
						216	53.9839
						217	53.9839
						217	0
						217	53.9839
						216.5	53.9839
						216.5	98.3992
						218.5	98.3992
						218.5	73.1028
						218	73.1028
						218	0
						218	73.1028
						219	73.1028
						219	0
						219	73.1028
						218.5	73.1028
						218.5	98.3992
						217.5	98.3992
						217.5	287.978
						221.5	287.978
						221.5	120.318
						220.5	120.318
						220.5	62.4041
						220	62.4041
						220	0
						220	62.4041
						221	62.4041
						221	0
						221	62.4041
						220.5	62.4041
						220.5	120.318
						222.5	120.318
						222.5	101.503
						222	101.503
						222	0
						222	101.503
						223	101.503
						223	0
						223	101.503
						222.5	101.503
						222.5	120.318
						221.5	120.318
						221.5	287.978
						219.5	287.978
						219.5	778.289
						232.562	778.289
						232.562	618.379
						227.5	618.379
						227.5	262.867
						225.5	262.867
						225.5	113.046
						224.5	113.046
						224.5	58.0518
						224	58.0518
						224	0
						224	58.0518
						225	58.0518
						225	0
						225	58.0518
						224.5	58.0518
						224.5	113.046
						226.5	113.046
						226.5	81.5506
						226	81.5506
						226	0
						226	81.5506
						227	81.5506
						227	0
						227	81.5506
						226.5	81.5506
						226.5	113.046
						225.5	113.046
						225.5	262.867
						229.5	262.867
						229.5	131.652
						228.5	131.652
						228.5	55.7624
						228	55.7624
						228	0
						228	55.7624
						229	55.7624
						229	0
						229	55.7624
						228.5	55.7624
						228.5	131.652
						230.5	131.652
						230.5	63.6738
						230	63.6738
						230	0
						230	63.6738
						231	63.6738
						231	0
						231	63.6738
						230.5	63.6738
						230.5	131.652
						229.5	131.652
						229.5	262.867
						227.5	262.867
						227.5	618.379
						237.625	618.379
						237.625	360.45
						234.625	360.45
						234.625	151.709
						232.75	151.709
						232.75	73.5476
						232	73.5476
						232	0
						232	73.5476
						233.5	73.5476
						233.5	42.5862
						233	42.5862
						233	0
						233	42.5862
						234	42.5862
						234	0
						234	42.5862
						233.5	42.5862
						233.5	73.5476
						232.75	73.5476
						232.75	151.709
						236.5	151.709
						236.5	89.3454
						235.5	89.3454
						235.5	37.0915
						235	37.0915
						235	0
						235	37.0915
						236	37.0915
						236	0
						236	37.0915
						235.5	37.0915
						235.5	89.3454
						237.5	89.3454
						237.5	50.4485
						237	50.4485
						237	0
						237	50.4485
						238	50.4485
						238	0
						238	50.4485
						237.5	50.4485
						237.5	89.3454
						236.5	89.3454
						236.5	151.709
						234.625	151.709
						234.625	360.45
						240.625	360.45
						240.625	171.608
						239.5	171.608
						239.5	55.5429
						239	55.5429
						239	0
						239	55.5429
						240	55.5429
						240	0
						240	55.5429
						239.5	55.5429
						239.5	171.608
						241.75	171.608
						241.75	99.8828
						241	99.8828
						241	0
						241	99.8828
						242.5	99.8828
						242.5	43.3295
						242	43.3295
						242	0
						242	43.3295
						243	43.3295
						243	0
						243	43.3295
						242.5	43.3295
						242.5	99.8828
						241.75	99.8828
						241.75	171.608
						240.625	171.608
						240.625	360.45
						237.625	360.45
						237.625	618.379
						232.562	618.379
						232.562	778.289
						226.031	778.289
						226.031	3226.27
						265.695	3226.27
						265.695	936.597
						254.141	936.597
						254.141	408.341
						248.875	408.341
						248.875	209.236
						246.25	209.236
						246.25	97.1244
						244.75	97.1244
						244.75	51.6453
						244	51.6453
						244	0
						244	51.6453
						245.5	51.6453
						245.5	22.7098
						245	22.7098
						245	0
						245	22.7098
						246	22.7098
						246	0
						246	22.7098
						245.5	22.7098
						245.5	51.6453
						244.75	51.6453
						244.75	97.1244
						247.75	97.1244
						247.75	57.961
						247	57.961
						247	0
						247	57.961
						248.5	57.961
						248.5	31.4314
						248	31.4314
						248	0
						248	31.4314
						249	31.4314
						249	0
						249	31.4314
						248.5	31.4314
						248.5	57.961
						247.75	57.961
						247.75	97.1244
						246.25	97.1244
						246.25	209.236
						251.5	209.236
						251.5	113.921
						250.5	113.921
						250.5	56.4387
						250	56.4387
						250	0
						250	56.4387
						251	56.4387
						251	0
						251	56.4387
						250.5	56.4387
						250.5	113.921
						252.5	113.921
						252.5	60.4361
						252	60.4361
						252	0
						252	60.4361
						253	60.4361
						253	0
						253	60.4361
						252.5	60.4361
						252.5	113.921
						251.5	113.921
						251.5	209.236
						248.875	209.236
						248.875	408.341
						259.406	408.341
						259.406	325.396
						256.312	325.396
						256.312	121.711
						254.5	121.711
						254.5	47.9817
						254	47.9817
						254	0
						254	47.9817
						255	47.9817
						255	0
						255	47.9817
						254.5	47.9817
						254.5	121.711
						258.125	121.711
						258.125	76.5905
						256.75	76.5905
						256.75	31.8816
						256	31.8816
						256	0
						256	31.8816
						257.5	31.8816
						257.5	12.4251
						257	12.4251
						257	0
						257	12.4251
						258	12.4251
						258	0
						258	12.4251
						257.5	12.4251
						257.5	31.8816
						256.75	31.8816
						256.75	76.5905
						259.5	76.5905
						259.5	40.8364
						259	40.8364
						259	0
						259	40.8364
						260	40.8364
						260	0
						260	40.8364
						259.5	40.8364
						259.5	76.5905
						258.125	76.5905
						258.125	121.711
						256.312	121.711
						256.312	325.396
						262.5	325.396
						262.5	123.274
						261.5	123.274
						261.5	69.173
						261	69.173
						261	0
						261	69.173
						262	69.173
						262	0
						262	69.173
						261.5	69.173
						261.5	123.274
						263.5	123.274
						263.5	74.3401
						263	74.3401
						263	0
						263	74.3401
						264	74.3401
						264	0
						264	74.3401
						263.5	74.3401
						263.5	123.274
						262.5	123.274
						262.5	325.396
						259.406	325.396
						259.406	408.341
						254.141	408.341
						254.141	936.597
						277.25	936.597
						277.25	794.188
						269.25	794.188
						269.25	314.989
						266.5	314.989
						266.5	136.646
						265.5	136.646
						265.5	40.7412
						265	40.7412
						265	0
						265	40.7412
						266	40.7412
						266	0
						266	40.7412
						265.5	40.7412
						265.5	136.646
						267.5	136.646
						267.5	81.1473
						267	81.1473
						267	0
						267	81.1473
						268	81.1473
						268	0
						268	81.1473
						267.5	81.1473
						267.5	136.646
						266.5	136.646
						266.5	314.989
						272	314.989
						272	147.236
						269.75	147.236
						269.75	49.6053
						269	49.6053
						269	0
						269	49.6053
						270.5	49.6053
						270.5	29.3276
						270	29.3276
						270	0
						270	29.3276
						271	29.3276
						271	0
						271	29.3276
						270.5	29.3276
						270.5	49.6053
						269.75	49.6053
						269.75	147.236
						274.25	147.236
						274.25	106.009
						272.75	106.009
						272.75	51.825
						272	51.825
						272	0
						272	51.825
						273.5	51.825
						273.5	32.0201
						273	32.0201
						273	0
						273	32.0201
						274	32.0201
						274	0
						274	32.0201
						273.5	32.0201
						273.5	51.825
						272.75	51.825
						272.75	106.009
						275.75	106.009
						275.75	66.9503
						275	66.9503
						275	0
						275	66.9503
						276.5	66.9503
						276.5	37.2714
						276	37.2714
						276	0
						276	37.2714
						277	37.2714
						277	0
						277	37.2714
						276.5	37.2714
						276.5	66.9503
						275.75	66.9503
						275.75	106.009
						274.25	106.009
						274.25	147.236
						272	147.236
						272	314.989
						269.25	314.989
						269.25	794.188
						285.25	794.188
						285.25	470.706
						280.875	470.706
						280.875	170.937
						278.875	170.937
						278.875	61.9746
						278	61.9746
						278	0
						278	61.9746
						279.75	61.9746
						279.75	25.9702
						279	25.9702
						279	0
						279	25.9702
						280.5	25.9702
						280.5	17.7344
						280	17.7344
						280	0
						280	17.7344
						281	17.7344
						281	0
						281	17.7344
						280.5	17.7344
						280.5	25.9702
						279.75	25.9702
						279.75	61.9746
						278.875	61.9746
						278.875	170.937
						282.875	170.937
						282.875	81.8355
						282	81.8355
						282	0
						282	81.8355
						283.75	81.8355
						283.75	69.4416
						283	69.4416
						283	0
						283	69.4416
						284.5	69.4416
						284.5	50.0704
						284	50.0704
						284	0
						284	50.0704
						285	50.0704
						285	0
						285	50.0704
						284.5	50.0704
						284.5	69.4416
						283.75	69.4416
						283.75	81.8355
						282.875	81.8355
						282.875	170.937
						280.875	170.937
						280.875	470.706
						289.625	470.706
						289.625	216.151
						286.75	216.151
						286.75	53.4264
						286	53.4264
						286	0
						286	53.4264
						287.5	53.4264
						287.5	42.2203
						287	42.2203
						287	0
						287	42.2203
						288	42.2203
						288	0
						288	42.2203
						287.5	42.2203
[truncated: 1,494 more rows]

## Sheet: Heat maps1_HID22
	KO_HFD1	KO_HFD2	WT_HFD1	WT_HFD3	WT_STD2	WT_STD3	WT_STD1	WT_HFD2	KO_STD2	KO_HFD3	KO_STD1	KO_STD3
Fkbp8	1	1	1	1	1	1	1	1	1	1	1	1
5031434O11Rik	1	1	1	1	1	1	1	1	1	1	1	1
Ighv1-74	1	1	1	1	1	1	1	1	1	1	1	1
Acd	1	1	1	1	1	1	1	1	1	1	1	1
Zc3h8	1	1	1	1	1	1	1	1	1	1	1	1
Ghrl	1	1	1	1	1	1	1	1	1	1	1	1
Gm31597	1	1	1	1	1	1	1	1	1	1	1	1
Tuba1c	1	1	1	1	1	1	1	1	1	1	1	1
S100a11	1	1	1	1	1	1	1	1	1	1	1	1
Adsl	1	1	1	1	1	1	1	1	1	1	1	1
Utp18	1	1	1	1	1	1	1	1	1	1	1	1
Srsf6	1	1	1	1	1	1	1	1	1	1	1	1
Hibch	1	1	1	1	1	1	1	1	1	1	1	1
Cept1	1	1	1	1	1	1	1	1	1	1	1	1
Snrpd3	1	1	1	1	1	1	1	1	1	1	1	1
Rps27rt	1	1	1	1	1	1	1	1	1	1	1	1
2310011J03Rik	1	1	1	1	1	1	1	1	1	1	1	1
Zcrb1	1	1	1	1	1	1	1	1	1	1	1	1
Nxt1	1	1	1	1	1	1	1	1	1	1	1	1
Csnk2b	1	1	1	1	1	1	1	1	1	1	1	1
Psmg3	1	1	1	1	1	1	1	1	1	1	1	1
Rpl35a	1	1	1	1	1	1	1	1	1	1	1	1
Cnbp	1	1	1	1	1	1	1	1	1	1	1	1
Hscb	1	1	1	1	1	1	1	1	1	1	1	1
Eif1ax	1	1	1	1	1	1	1	1	1	1	1	1
Aprt	1	1	1	1	1	1	1	1	1	1	1	1
Mpdu1	1	1	1	1	1	1	1	1	1	1	1	1
Rccd1	1	1	1	1	1	1	1	1	1	1	1	1
Asf1a	1	1	1	1	1	1	1	1	1	1	1	1
Rpl17-ps10	1	1	1	1	1	1	1	1	1	1	1	1
Mcts2	1	1	1	1	1	1	1	1	1	1	1	1
Idh3g	1	1	1	1	1	1	1	1	1	1	1	1
Mindy3	1	1	1	1	1	1	1	1	1	1	1	1
Eny2	1	1	1	1	1	1	1	1	1	1	1	1
Anxa1	1	1	1	1	1	1	1	1	1	1	1	1
Cdkn3	1	1	1	1	1	1	1	1	1	1	1	1
Uqcrc2	1	1	1	1	1	1	1	1	1	1	1	1
Hars2	1	1	1	1	1	1	1	1	1	1	1	1
DQ267102	1	1	1	1	1	1	1	1	1	1	1	1
Esrra	1	1	1	1	1	1	1	1	1	1	1	1
Gm34552	1	1	1	1	1	1	1	1	1	1	1	1
Tmem258	1	1	1	1	1	1	1	1	1	1	1	1
Tmem50a	1	1	1	1	1	1	1	1	1	1	1	1
Ndufc1	1	1	1	1	1	1	1	1	1	1	1	1
Tcea1	1	1	1	1	1	1	1	1	1	1	1	1
Grpel1	1	1	1	1	1	1	1	1	1	1	1	1
5730480H06Rik	1	1	1	1	1	1	1	1	1	1	1	1
Ndufv3	1	1	1	1	1	1	1	1	1	1	1	1
Jagn1	1	1	1	1	1	1	1	1	1	1	1	1
Txndc9	1	1	1	1	1	1	1	1	1	1	1	1
Ormdl1	1	1	1	1	1	1	1	1	1	1	1	1
Rpp40	1	1	1	1	1	1	1	1	1	1	1	1
Atp5j	1	1	1	1	1	1	1	1	1	1	1	1
Tm2d1	1	1	1	1	1	1	1	1	1	1	1	1
Dhps	1	1	1	1	1	1	1	1	1	1	1	1
Fxn	1	1	1	1	1	1	1	1	1	1	1	1
Riiad1	1	1	1	1	1	1	1	1	1	1	1	1
Rpl19-ps11	1	1	1	1	1	1	1	1	1	1	1	1
Atp5l	1	1	1	1	1	1	1	1	1	1	1	1
Gm15651	1	1	1	1	1	1	1	1	1	1	1	1
9130401M01Rik	1	1	1	1	1	1	1	1	1	1	1	1
4930570G19Rik	1	1	1	1	1	1	1	1	1	1	1	1
Ppp1r42	1	1	1	1	1	1	1	1	1	1	1	1
1810059C17Rik	1	1	1	1	1	1	1	1	1	1	1	1
Gsap	1	1	1	1	1	1	1	1	1	1	1	1
Arglu1	1	1	1	1	1	1	1	1	1	1	1	1
Gm13613	1	1	1	1	1	1	1	1	1	1	1	1
Ndn	1	1	1	1	1	1	1	1	1	1	1	1
Trav3-1	1	1	1	1	1	1	1	1	1	1	1	1
Tmem30a	1	1	1	1	1	1	1	1	1	1	1	1
Zfp760	1	1	1	1	1	1	1	1	1	1	1	1
mt-Nd3	1	1	1	1	1	1	1	1	1	1	1	1
Snord71	1	1	1	1	1	1	1	1	1	1	1	1
Actr1b	1	1	1	1	1	1	1	1	1	1	1	1
Armcx4	1	1	1	1	1	1	1	1	1	1	1	1
Mkx	1	1	1	1	1	1	1	1	1	1	1	1
Zfp69	1	1	1	1	1	1	1	1	1	1	1	1
Gm13031	1	1	1	1	1	1	1	1	1	1	1	1
Gde1	1	1	1	1	1	1	1	1	1	1	1	1
Blzf1	1	1	1	1	1	1	1	1	1	1	1	1
Dusp23	1	1	1	1	1	1	1	1	1	1	1	1
Map4	1	1	1	1	1	1	1	1	1	1	1	1
Scnn1g	1	1	1	1	1	1	1	1	1	1	1	1
Sumf1	1	1	1	1	1	1	1	1	1	1	1	1
Rsph3b	1	1	1	1	1	1	1	1	1	1	1	1
Ogdhl	1	1	1	1	1	1	1	1	1	1	1	1
Klhdc3	1	1	1	1	1	1	1	1	1	1	1	1
Tmem189	1	1	1	1	1	1	1	1	1	1	1	1
Efcab5	1	1	1	1	1	1	1	1	1	1	1	1
Amigo2	1	1	1	1	1	1	1	1	1	1	1	1
Ifitm1	1	1	1	1	1	1	1	1	1	1	1	1
Ywhah	1	1	1	1	1	1	1	1	1	1	1	1
Fbxw24	1	1	1	1	1	1	1	1	1	1	1	1
Ccdc74a	1	1	1	1	1	1	1	1	1	1	1	1
4930594M22Rik	1	1	1	1	1	1	1	1	1	1	1	1
Pstpip2	1	1	1	1	1	1	1	1	1	1	1	1
Fcgr3	1	1	1	1	1	1	1	1	1	1	1	1
Crispld2	1	1	1	1	1	1	1	1	1	1	1	1
Gm17767	1	1	1	1	1	1	1	1	1	1	1	1
Akap17b	1	1	1	1	1	1	1	1	1	1	1	1
Nudcd1	1	1	1	1	1	1	1	1	1	1	1	1
Ttc13	1	1	1	1	1	1	1	1	1	1	1	1
Commd9	1	1	1	1	1	1	1	1	1	1	1	1
Dhrs7	1	1	1	1	1	1	1	1	1	1	1	1
Rab9b	1	1	1	1	1	1	1	1	1	1	1	1
Gpr182	1	1	1	1	1	1	1	1	1	1	1	1
Bag2	1	1	1	1	1	1	1	1	1	1	1	1
Nit1	1	1	1	1	1	1	1	1	1	1	1	1
Psmd6	1	1	1	1	1	1	1	1	1	1	1	1
Yipf5	1	1	1	1	1	1	1	1	1	1	1	1
Aasdhppt	1	1	1	1	1	1	1	1	1	1	1	1
Gm2861	1	1	1	1	1	1	1	1	1	1	1	1
Skap2	1	1	1	1	1	1	1	1	1	1	1	1
Gm14546	1	1	1	1	1	1	1	1	1	1	1	1
Serpini1	1	1	1	1	1	1	1	1	1	1	1	1
Nsun4	1	1	1	1	1	1	1	1	1	1	1	1
Gm47626	1	1	1	1	1	1	1	1	1	1	1	1
Gpx8	1	1	1	1	1	1	1	1	1	1	1	1
1700015G11Rik	1	1	1	1	1	1	1	1	1	1	1	1
Kctd2	1	1	1	1	1	1	1	1	1	1	1	1
Gm49376	1	1	1	1	1	1	1	1	1	1	1	1
Smn1	1	1	1	1	1	1	1	1	1	1	1	1
Gmppb	1	1	1	1	1	1	1	1	1	1	1	1
Dpm2	1	1	1	1	1	1	1	1	1	1	1	1
1700020L24Rik	1	1	1	1	1	1	1	1	1	1	1	1
Gm42517	1	1	1	1	1	1	1	1	1	1	1	1
Gm27167	1	1	1	1	1	1	1	1	1	1	1	1
Gm31718	1	1	1	1	1	1	1	1	1	1	1	1
Ebpl	1	1	1	1	1	1	1	1	1	1	1	1
Ndufaf1	1	1	1	1	1	1	1	1	1	1	1	1
Gm6083	1	1	1	1	1	1	1	1	1	1	1	1
Edf1	1	1	1	1	1	1	1	1	1	1	1	1
Armc6	1	1	1	1	1	1	1	1	1	1	1	1
4930412M03Rik	1	1	1	1	1	1	1	1	1	1	1	1
Mipol1	1	1	1	1	1	1	1	1	1	1	1	1
Napsa	1	1	1	1	1	1	1	1	1	1	1	1
Igkv7-33	1	1	1	1	1	1	1	1	1	1	1	1
Mynn	1	1	1	1	1	1	1	1	1	1	1	1
1700013F07Rik	1	1	1	1	1	1	1	1	1	1	1	1
Dact1	1	1	1	1	1	1	1	1	1	1	1	1
Hnrnpd	1	1	1	1	1	1	1	1	1	1	1	1
Med26	1	1	1	1	1	1	1	1	1	1	1	1
Gm47232	1	1	1	1	1	1	1	1	1	1	1	1
Zfp707	1	1	1	1	1	1	1	1	1	1	1	1
Erf	1	1	1	1	1	1	1	1	1	1	1	1
Rcor3	1	1	1	1	1	1	1	1	1	1	1	1
Trp53i11	1	1	1	1	1	1	1	1	1	1	1	1
Gria3	1	1	1	1	1	1	1	1	1	1	1	1
Cep290	1	1	1	1	1	1	1	1	1	1	1	1
Casc4	1	1	1	1	1	1	1	1	1	1	1	1
Erich3	1	1	1	1	1	1	1	1	1	1	1	1
Tarsl2	1	1	1	1	1	1	1	1	1	1	1	1
Unc80	1	1	1	1	1	1	1	1	1	1	1	1
Adam22	1	1	1	1	1	1	1	1	1	1	1	1
Abhd13	1	1	1	1	1	1	1	1	1	1	1	1
Dtnbos	1	1	1	1	1	1	1	1	1	1	1	1
Epha7	1	1	1	1	1	1	1	1	1	1	1	1
Isoc1	1	1	1	1	1	1	1	1	1	1	1	1
Nr3c2	1	1	1	1	1	1	1	1	1	1	1	1
Ctu1	1	1	1	1	1	1	1	1	1	1	1	1
Adamtsl2	1	1	1	1	1	1	1	1	1	1	1	1
Barx2	1	1	1	1	1	1	1	1	1	1	1	1
E330040D14Rik	1	1	1	1	1	1	1	1	1	1	1	1
Aig1	1	1	1	1	1	1	1	1	1	1	1	1
Rtn2	1	1	1	1	1	1	1	1	1	1	1	1
Spock2	1	1	1	1	1	1	1	1	1	1	1	1
Pfkm	1	1	1	1	1	1	1	1	1	1	1	1
Rnf217	1	1	1	1	1	1	1	1	1	1	1	1
Car10	1	1	1	1	1	1	1	1	1	1	1	1
4930555F03Rik	1	1	1	1	1	1	1	1	1	1	1	1
Sel1l3	1	1	1	1	1	1	1	1	1	1	1	1
Cnr1	1	1	1	1	1	1	1	1	1	1	1	1
Itgb8	1	1	1	1	1	1	1	1	1	1	1	1
Nek5	1	1	1	1	1	1	1	1	1	1	1	1
Mlxipl	1	1	1	1	1	1	1	1	1	1	1	1
Kcnip4	1	1	1	1	1	1	1	1	1	1	1	1
Adi1	1	1	1	1	1	1	1	1	1	1	1	1
Slc35d3	1	1	1	1	1	1	1	1	1	1	1	1
Agbl4	1	1	1	1	1	1	1	1	1	1	1	1
N6amt1	1	1	1	1	1	1	1	1	1	1	1	1
Zmiz1os1	1	1	1	1	1	1	1	1	1	1	1	1
Dbndd2	1	1	1	1	1	1	1	1	1	1	1	1
Akap6	1	1	1	1	1	1	1	1	1	1	1	1
Mpz	1	1	1	1	1	1	1	1	1	1	1	1
A830019P07Rik	1	1	1	1	1	1	1	1	1	1	1	1
Gm4606	1	1	1	1	1	1	1	1	1	1	1	1
9330151L19Rik	1	1	1	1	1	1	1	1	1	1	1	1
Gm43690	1	1	1	1	1	1	1	1	1	1	1	1
Mirlet7a-1	1	1	1	1	1	1	1	1	1	1	1	1
Gm9442	1	1	1	1	1	1	1	1	1	1	1	1
Gm21960	1	1	1	1	1	1	1	1	1	1	1	1
Tmem33	1	1	1	1	1	1	1	1	1	1	1	1
Mid1	1	1	1	1	1	1	1	1	1	1	1	1
1810062O18Rik	1	1	1	1	1	1	1	1	1	1	1	1
Ncbp2	1	1	1	1	1	1	1	1	1	1	1	1
Vps37c	1	1	1	1	1	1	1	1	1	1	1	1
Poc5	1	1	1	1	1	1	1	1	1	1	1	1
Ficd	1	1	1	1	1	1	1	1	1	1	1	1
Pcbp1	1	1	1	1	1	1	1	1	1	1	1	1
Metap1	1	1	1	1	1	1	1	1	1	1	1	1
Pax6	1	1	1	1	1	1	1	1	1	1	1	1
Syt9	1	1	1	1	1	1	1	1	1	1	1	1
Emcn	1	1	1	1	1	1	1	1	1	1	1	1
Myct1	1	1	1	1	1	1	1	1	1	1	1	1
3110083C13Rik	1	1	1	1	1	1	1	1	1	1	1	1
Katnal2	1	1	1	1	1	1	1	1	1	1	1	1
Sh3glb1	1	1	1	1	1	1	1	1	1	1	1	1
Bcr	1	1	1	1	1	1	1	1	1	1	1	1
Atxn2	1	1	1	1	1	1	1	1	1	1	1	1
Zxdc	1	1	1	1	1	1	1	1	1	1	1	1
Eif4g1	1	1	1	1	1	1	1	1	1	1	1	1
Ttyh2	1	1	1	1	1	1	1	1	1	1	1	1
Zfr2	1	1	1	1	1	1	1	1	1	1	1	1
Robo2	1	1	1	1	1	1	1	1	1	1	1	1
Cmtm4	1	1	1	1	1	1	1	1	1	1	1	1
Mindy2	1	1	1	1	1	1	1	1	1	1	1	1
Atp6ap1	1	1	1	1	1	1	1	1	1	1	1	1
Shpk	1	1	1	1	1	1	1	1	1	1	1	1
Pcdha2	1	1	1	1	1	1	1	1	1	1	1	1
Epas1	1	1	1	1	1	1	1	1	1	1	1	1
Fn3krp	1	1	1	1	1	1	1	1	1	1	1	1
Ccdc149	1	1	1	1	1	1	1	1	1	1	1	1
Scarb1	1	1	1	1	1	1	1	1	1	1	1	1
Pphln1	1	1	1	1	1	1	1	1	1	1	1	1
Gm6723	1	1	1	1	1	1	1	1	1	1	1	1
Ttc9c	1	1	1	1	1	1	1	1	1	1	1	1
2019-09-11	1	1	1	1	1	1	1	1	1	1	1	1
Cln8	1	1	1	1	1	1	1	1	1	1	1	1
Iars	1	1	1	1	1	1	1	1	1	1	1	1
Cacna1b	1	1	1	1	1	1	1	1	1	1	1	1
Txnrd1	1	1	1	1	1	1	1	1	1	1	1	1
Atg16l1	1	1	1	1	1	1	1	1	1	1	1	1
Slc16a12	1	1	1	1	1	1	1	1	1	1	1	1
Ppp2r1a	1	1	1	1	1	1	1	1	1	1	1	1
Bcl2l13	1	1	1	1	1	1	1	1	1	1	1	1
Fam98b	1	1	1	1	1	1	1	1	1	1	1	1
Alg9	1	1	1	1	1	1	1	1	1	1	1	1
Prpf19	1	1	1	1	1	1	1	1	1	1	1	1
Rgp1	1	1	1	1	1	1	1	1	1	1	1	1
Tbc1d22b	1	1	1	1	1	1	1	1	1	1	1	1
Retreg2	1	1	1	1	1	1	1	1	1	1	1	1
Leprotl1	1	1	1	1	1	1	1	1	1	1	1	1
Zfp830	1	1	1	1	1	1	1	1	1	1	1	1
Ints6	1	1	1	1	1	1	1	1	1	1	1	1
Ehbp1	1	1	1	1	1	1	1	1	1	1	1	1
Prss23	1	1	1	1	1	1	1	1	1	1	1	1
Zfp91	1	1	1	1	1	1	1	1	1	1	1	1
Zfp62	1	1	1	1	1	1	1	1	1	1	1	1
Macf1	1	1	1	1	1	1	1	1	1	1	1	1
Polr2b	1	1	1	1	1	1	1	1	1	1	1	1
Tnpo3	1	1	1	1	1	1	1	1	1	1	1	1
Sptbn1	1	1	1	1	1	1	1	1	1	1	1	1
G2e3	1	1	1	1	1	1	1	1	1	1	1	1
Zc3h14	1	1	1	1	1	1	1	1	1	1	1	1
Mysm1	1	1	1	1	1	1	1	1	1	1	1	1
Usp42	1	1	1	1	1	1	1	1	1	1	1	1
Rapgef4	1	1	1	1	1	1	1	1	1	1	1	1
Lats1	1	1	1	1	1	1	1	1	1	1	1	1
Zfp398	1	1	1	1	1	1	1	1	1	1	1	1
Purg	1	1	1	1	1	1	1	1	1	1	1	1
Mitf	1	1	1	1	1	1	1	1	1	1	1	1
1810059H22Rik	1	1	1	1	1	1	1	1	1	1	1	1
Ppargc1b	1	1	1	1	1	1	1	1	1	1	1	1
Atrx	1	1	1	1	1	1	1	1	1	1	1	1
Usp34	1	1	1	1	1	1	1	1	1	1	1	1
Itga2	1	1	1	1	1	1	1	1	1	1	1	1
Znfx1	1	1	1	1	1	1	1	1	1	1	1	1
Kmt5b	1	1	1	1	1	1	1	1	1	1	1	1
Pdpr	1	1	1	1	1	1	1	1	1	1	1	1
Fasn	1	1	1	1	1	1	1	1	1	1	1	1
Nup214	1	1	1	1	1	1	1	1	1	1	1	1
Trrap	1	1	1	1	1	1	1	1	1	1	1	1
Depdc5	1	1	1	1	1	1	1	1	1	1	1	1
Trak1	1	1	1	1	1	1	1	1	1	1	1	1
Pard3	1	1	1	1	1	1	1	1	1	1	1	1
Acap2	1	1	1	1	1	1	1	1	1	1	1	1
Plag1	1	1	1	1	1	1	1	1	1	1	1	1
Ciz1	1	1	1	1	1	1	1	1	1	1	1	1
Tufm	1	1	1	1	1	1	1	1	1	1	1	1
Rcc1l	1	1	1	1	1	1	1	1	1	1	1	1
Trim41	1	1	1	1	1	1	1	1	1	1	1	1
Tmem151a	1	1	1	1	1	1	1	1	1	1	1	1
Cacnb3	1	1	1	1	1	1	1	1	1	1	1	1
Nfx1	1	1	1	1	1	1	1	1	1	1	1	1
Ncbp3	1	1	1	1	1	1	1	1	1	1	1	1
Sema4b	1	1	1	1	1	1	1	1	1	1	1	1
9530068E07Rik	1	1	1	1	1	1	1	1	1	1	1	1
Caskin2	1	1	1	1	1	1	1	1	1	1	1	1
Aars2	1	1	1	1	1	1	1	1	1	1	1	1
Clpb	1	1	1	1	1	1	1	1	1	1	1	1
Zfp239	1	1	1	1	1	1	1	1	1	1	1	1
Agtrap	1	1	1	1	1	1	1	1	1	1	1	1
Prpf40b	1	1	1	1	1	1	1	1	1	1	1	1
Shld2	1	1	1	1	1	1	1	1	1	1	1	1
Mios	1	1	1	1	1	1	1	1	1	1	1	1
1810028F09Rik	1	1	1	1	1	1	1	1	1	1	1	1
Asb4	1	1	1	1	1	1	1	1	1	1	1	1
Gclc	1	1	1	1	1	1	1	1	1	1	1	1
Pafah2	1	1	1	1	1	1	1	1	1	1	1	1
Zfp618	1	1	1	1	1	1	1	1	1	1	1	1
Ptpn13	1	1	1	1	1	1	1	1	1	1	1	1
Chd4	1	1	1	1	1	1	1	1	1	1	1	1
Kdm5a	1	1	1	1	1	1	1	1	1	1	1	1
Tubgcp6	1	1	1	1	1	1	1	1	1	1	1	1
Slc4a2	1	1	1	1	1	1	1	1	1	1	1	1
Zfp26	1	1	1	1	1	1	1	1	1	1	1	1
Sfswap	1	1	1	1	1	1	1	1	1	1	1	1
Plcb3	1	1	1	1	1	1	1	1	1	1	1	1
Flii	1	1	1	1	1	1	1	1	1	1	1	1
Gm42428	1	1	1	1	1	1	1	1	1	1	1	1
5830444B04Rik	1	1	1	1	1	1	1	1	1	1	1	1
Prps1l3	1	1	1	1	1	1	1	1	1	1	1	1
Gpd1l	1	1	1	1	1	1	1	1	1	1	1	1
Ppil4	1	1	1	1	1	1	1	1	1	1	1	1
Fam3c	1	1	1	1	1	1	1	1	1	1	1	1
Ammecr1l	1	1	1	1	1	1	1	1	1	1	1	1
Abcc1	1	1	1	1	1	1	1	1	1	1	1	1
Gak	1	1	1	1	1	1	1	1	1	1	1	1
Pi4kb	1	1	1	1	1	1	1	1	1	1	1	1
Smg8	1	1	1	1	1	1	1	1	1	1	1	1
Ubqln4	1	1	1	1	1	1	1	1	1	1	1	1
Traf3	1	1	1	1	1	1	1	1	1	1	1	1
Pard3b	1	1	1	1	1	1	1	1	1	1	1	1
Ccnd3	1	1	1	1	1	1	1	1	1	1	1	1
Anks1	1	1	1	1	1	1	1	1	1	1	1	1
Klhl25	1	1	1	1	1	1	1	1	1	1	1	1
Pbld2	1	1	1	1	1	1	1	1	1	1	1	1
Thap11	1	1	1	1	1	1	1	1	1	1	1	1
Abt1	1	1	1	1	1	1	1	1	1	1	1	1
1810043G02Rik	1	1	1	1	1	1	1	1	1	1	1	1
Phf1	1	1	1	1	1	1	1	1	1	1	1	1
Inafm1	1	1	1	1	1	1	1	1	1	1	1	1
Gm10157	1	1	1	1	1	1	1	1	1	1	1	1
Dcakd	1	1	1	1	1	1	1	1	1	1	1	1
Vps4a	1	1	1	1	1	1	1	1	1	1	1	1
Mir212	1	1	1	1	1	1	1	1	1	1	1	1
Zrsr2	1	1	1	1	1	1	1	1	1	1	1	1
Tnf	1	1	1	1	1	1	1	1	1	1	1	1
Gpatch11	1	1	1	1	1	1	1	1	1	1	1	1
Irx2	1	1	1	1	1	1	1	1	1	1	1	1
Sost	1	1	1	1	1	1	1	1	1	1	1	1
Gps2	1	1	1	1	1	1	1	1	1	1	1	1
Sclt1	1	1	1	1	1	1	1	1	1	1	1	1
Spata5l1	1	1	1	1	1	1	1	1	1	1	1	1
Kri1	1	1	1	1	1	1	1	1	1	1	1	1
Mex3a	1	1	1	1	1	1	1	1	1	1	1	1
Nfkbia	1	1	1	1	1	1	1	1	1	1	1	1
Pold2	1	1	1	1	1	1	1	1	1	1	1	1
Fra10ac1	1	1	1	1	1	1	1	1	1	1	1	1
Trmt1	1	1	1	1	1	1	1	1	1	1	1	1
Ptma	1	1	1	1	1	1	1	1	1	1	1	1
Trim12c	1	1	1	1	1	1	1	1	1	1	1	1
Lcmt2	1	1	1	1	1	1	1	1	1	1	1	1
Efcc1	1	1	1	1	1	1	1	1	1	1	1	1
Zfp768	1	1	1	1	1	1	1	1	1	1	1	1
Plscr3	1	1	1	1	1	1	1	1	1	1	1	1
Blm	1	1	1	1	1	1	1	1	1	1	1	1
Gm10451	1	1	1	1	1	1	1	1	1	1	1	1
Abtb1	1	1	1	1	1	1	1	1	1	1	1	1
Gm44361	1	1	1	1	1	1	1	1	1	1	1	1
Gm8730	1	1	1	1	1	1	1	1	1	1	1	1
Ahcy	1	1	1	1	1	1	1	1	1	1	1	1
Slc17a4	1	1	1	1	1	1	1	1	1	1	1	1
Igkv4-61	1	1	1	1	1	1	1	1	1	1	1	1
Gls2	1	1	1	1	1	1	1	1	1	1	1	1
Cyp3a25	1	1	1	1	1	1	1	1	1	1	1	1
Shmt1	1	1	1	1	1	1	1	1	1	1	1	1
Pm20d1	1	1	1	1	1	1	1	1	1	1	1	1
Pklr	1	1	1	1	1	1	1	1	1	1	1	1
Mfsd4b1	1	1	1	1	1	1	1	1	1	1	1	1
Myom1	1	1	1	1	1	1	1	1	1	1	1	1
Gatb	1	1	1	1	1	1	1	1	1	1	1	1
Insl6	1	1	1	1	1	1	1	1	1	1	1	1
Tbxas1	1	1	1	1	1	1	1	1	1	1	1	1
Ighv1-47	1	1	1	1	1	1	1	1	1	1	1	1
Ly96	1	1	1	1	1	1	1	1	1	1	1	1
Asf1b	1	1	1	1	1	1	1	1	1	1	1	1
Ugt1a7c	1	1	1	1	1	1	1	1	1	1	1	1
Soat2	1	1	1	1	1	1	1	1	1	1	1	1
Btnl5-ps	1	1	1	1	1	1	1	1	1	1	1	1
Oxct1	1	1	1	1	1	1	1	1	1	1	1	1
Sytl2	1	1	1	1	1	1	1	1	1	1	1	1
Igsf23	1	1	1	1	1	1	1	1	1	1	1	1
Ms4a8a	1	1	1	1	1	1	1	1	1	1	1	1
Arih2	1	1	1	1	1	1	1	1	1	1	1	1
Plin1	1	1	1	1	1	1	1	1	1	1	1	1
Thnsl2	1	1	1	1	1	1	1	1	1	1	1	1
Aebp1	1	1	1	1	1	1	1	1	1	1	1	1
Adamtsl1	1	1	1	1	1	1	1	1	1	1	1	1
Dock4	1	1	1	1	1	1	1	1	1	1	1	1
Igkv12-44	1	1	1	1	1	1	1	1	1	1	1	1
Emilin2	1	1	1	1	1	1	1	1	1	1	1	1
Abi3bp	1	1	1	1	1	1	1	1	1	1	1	1
Prdm1	1	1	1	1	1	1	1	1	1	1	1	1
Rdh10	1	1	1	1	1	1	1	1	1	1	1	1
Rem1	1	1	1	1	1	1	1	1	1	1	1	1
Myl9	1	1	1	1	1	1	1	1	1	1	1	1
Col6a3	1	1	1	1	1	1	1	1	1	1	1	1
Tedc2	1	1	1	1	1	1	1	1	1	1	1	1
Tmem45a	1	1	1	1	1	1	1	1	1	1	1	1
Ppp2r2b	1	1	1	1	1	1	1	1	1	1	1	1
Prelp	1	1	1	1	1	1	1	1	1	1	1	1
Thsd7a	1	1	1	1	1	1	1	1	1	1	1	1
Lbp	1	1	1	1	1	1	1	1	1	1	1	1
Itga9	1	1	1	1	1	1	1	1	1	1	1	1
Katnb1	1	1	1	1	1	1	1	1	1	1	1	1
Slc15a3	1	1	1	1	1	1	1	1	1	1	1	1
Cyb5r4	1	1	1	1	1	1	1	1	1	1	1	1
Gm47652	1	1	1	1	1	1	1	1	1	1	1	1
Spast	1	1	1	1	1	1	1	1	1	1	1	1
Igf1	1	1	1	1	1	1	1	1	1	1	1	1
Shisa8	1	1	1	1	1	1	1	1	1	1	1	1
Tac1	1	1	1	1	1	1	1	1	1	1	1	1
Iqcg	1	1	1	1	1	1	1	1	1	1	1	1
Ntn4	1	1	1	1	1	1	1	1	1	1	1	1
Atp1b3	1	1	1	1	1	1	1	1	1	1	1	1
Vdac2	1	1	1	1	1	1	1	1	1	1	1	1
Gprc5c	1	1	1	1	1	1	1	1	1	1	1	1
Spidr	1	1	1	1	1	1	1	1	1	1	1	1
Ugdh	1	1	1	1	1	1	1	1	1	1	1	1
Slc8b1	1	1	1	1	1	1	1	1	1	1	1	1
Siglec1	1	1	1	1	1	1	1	1	1	1	1	1
Selenbp2	1	1	1	1	1	1	1	1	1	1	1	1
Kcnip3	1	1	1	1	1	1	1	1	1	1	1	1
Ier3	1	1	1	1	1	1	1	1	1	1	1	1
Snhg18	1	1	1	1	1	1	1	1	1	1	1	1
Plekhn1	1	1	1	1	1	1	1	1	1	1	1	1
Ddx39	1	1	1	1	1	1	1	1	1	1	1	1
Polg2	1	1	1	1	1	1	1	1	1	1	1	1
Cdca3	1	1	1	1	1	1	1	1	1	1	1	1
Odf3b	1	1	1	1	1	1	1	1	1	1	1	1
Paics	1	1	1	1	1	1	1	1	1	1	1	1
Gm4898	1	1	1	1	1	1	1	1	1	1	1	1
Prr15l	1	1	1	1	1	1	1	1	1	1	1	1
Erbb3	1	1	1	1	1	1	1	1	1	1	1	1
Myo5c	1	1	1	1	1	1	1	1	1	1	1	1
Fam13a	1	1	1	1	1	1	1	1	1	1	1	1
Ccdc120	1	1	1	1	1	1	1	1	1	1	1	1
Dtx4	1	1	1	1	1	1	1	1	1	1	1	1
Clmn	1	1	1	1	1	1	1	1	1	1	1	1
Map3k21	1	1	1	1	1	1	1	1	1	1	1	1
Foxc1	1	1	1	1	1	1	1	1	1	1	1	1
Crybg1	1	1	1	1	1	1	1	1	1	1	1	1
Zfyve28	1	1	1	1	1	1	1	1	1	1	1	1
Plin3	1	1	1	1	1	1	1	1	1	1	1	1
Vnn1	1	1	1	1	1	1	1	1	1	1	1	1
Frmd8	1	1	1	1	1	1	1	1	1	1	1	1
Hbegf	1	1	1	1	1	1	1	1	1	1	1	1
Eya2	1	1	1	1	1	1	1	1	1	1	1	1
Gm8451	1	1	1	1	1	1	1	1	1	1	1	1
Tma16	1	1	1	1	1	1	1	1	1	1	1	1
Mansc1	1	1	1	1	1	1	1	1	1	1	1	1
Bckdha	1	1	1	1	1	1	1	1	1	1	1	1
Zfp2	1	1	1	1	1	1	1	1	1	1	1	1
Chadl	1	1	1	1	1	1	1	1	1	1	1	1
Lat	1	1	1	1	1	1	1	1	1	1	1	1
Gm24119	1	1	1	1	1	1	1	1	1	1	1	1
Hk1	1	1	1	1	1	1	1	1	1	1	1	1
Cited1	1	1	1	1	1	1	1	1	1	1	1	1
Sema4d	1	1	1	1	1	1	1	1	1	1	1	1
Scml4	1	1	1	1	1	1	1	1	1	1	1	1
Nsmaf	1	1	1	1	1	1	1	1	1	1	1	1
Nfrkb	1	1	1	1	1	1	1	1	1	1	1	1
Parvg	1	1	1	1	1	1	1	1	1	1	1	1
Pou2f2	1	1	1	1	1	1	1	1	1	1	1	1
Jak3	1	1	1	1	1	1	1	1	1	1	1	1
Cd40lg	1	1	1	1	1	1	1	1	1	1	1	1
Cmah	1	1	1	1	1	1	1	1	1	1	1	1
Uqcrc1	1	1	1	1	1	1	1	1	1	1	1	1
Coro7	1	1	1	1	1	1	1	1	1	1	1	1
Nfkb2	1	1	1	1	1	1	1	1	1	1	1	1
Myo9b	1	1	1	1	1	1	1	1	1	1	1	1
Cd82	1	1	1	1	1	1	1	1	1	1	1	1
Gm1966	1	1	1	1	1	1	1	1	1	1	1	1
Ier5	1	1	1	1	1	1	1	1	1	1	1	1
Gm11998	1	1	1	1	1	1	1	1	1	1	1	1
Coro1a	1	1	1	1	1	1	1	1	1	1	1	1
Fcrla	1	1	1	1	1	1	1	1	1	1	1	1
Ly86	1	1	1	1	1	1	1	1	1	1	1	1
Ppm1m	1	1	1	1	1	1	1	1	1	1	1	1
Clp1	1	1	1	1	1	1	1	1	1	1	1	1
I730030J21Rik	1	1	1	1	1	1	1	1	1	1	1	1
Mfng	1	1	1	1	1	1	1	1	1	1	1	1
Gm22068	1	1	1	1	1	1	1	1	1	1	1	1
Myc	1	1	1	1	1	1	1	1	1	1	1	1
Phf19	1	1	1	1	1	1	1	1	1	1	1	1
A530040E14Rik	1	1	1	1	1	1	1	1	1	1	1	1
Rpl13	1	1	1	1	1	1	1	1	1	1	1	1
Lat2	1	1	1	1	1	1	1	1	1	1	1	1
Fyn	1	1	1	1	1	1	1	1	1	1	1	1
Inf2	1	1	1	1	1	1	1	1	1	1	1	1
Cd84	1	1	1	1	1	1	1	1	1	1	1	1
Haus3	1	1	1	1	1	1	1	1	1	1	1	1
Ifi47	1	1	1	1	1	1	1	1	1	1	1	1
Fancg	1	1	1	1	1	1	1	1	1	1	1	1
Rnu5g	1	1	1	1	1	1	1	1	1	1	1	1
Nap1l1	1	1	1	1	1	1	1	1	1	1	1	1
Gm49357	1	1	1	1	1	1	1	1	1	1	1	1
Gm45091	1	1	1	1	1	1	1	1	1	1	1	1
Snx22	1	1	1	1	1	1	1	1	1	1	1	1

## Sheet: Heat maps2_HID18
6.125	5116.68					171.106	4226.86
3	5116.68					52.4429	4226.86
3	775.462					52.4429	327.448
1.5	775.462					16.2461	327.448
1.5	131.986					16.2461	69.5003
1	131.986					5.625	69.5003
1	0					5.625	14.8645
1	131.986					2.25	14.8645
2	131.986					2.25	5.05972
2	0					1	5.05972
2	131.986					1	0
1.5	131.986					1	5.05972
1.5	775.462					3.5	5.05972
4.5	775.462					3.5	1.51032
4.5	424.04					2.5	1.51032
3.5	424.04					2.5	0.325978
3.5	299.488					2	0.325978
3	299.488					2	0
3	0					2	0.325978
3	299.488					3	0.325978
4	299.488					3	0
4	0					3	0.325978
4	299.488					2.5	0.325978
3.5	299.488					2.5	1.51032
3.5	424.04					4.5	1.51032
5.5	424.04					4.5	0.483289
5.5	315.563					4	0.483289
5	315.563					4	0
5	0					4	0.483289
5	315.563					5	0.483289
6	315.563					5	0
6	0					5	0.483289
6	315.563					4.5	0.483289
5.5	315.563					4.5	1.51032
5.5	424.04					3.5	1.51032
4.5	424.04					3.5	5.05972
4.5	775.462					2.25	5.05972
3	775.462					2.25	14.8645
3	5116.68					9	14.8645
9.25	5116.68					9	5.7936
9.25	1241.04					7.5	5.7936
7.75	1241.04					7.5	1.244
7.75	441.422					6.5	1.244
7	441.422					6.5	0.284923
7	0					6	0.284923
7	441.422					6	0
8.5	441.422					6	0.284923
8.5	309.744					7	0.284923
8	309.744					7	0
8	0					7	0.284923
8	309.744					6.5	0.284923
9	309.744					6.5	1.244
9	0					8.5	1.244
9	309.744					8.5	0.593135
8.5	309.744					8	0.593135
8.5	441.422					8	0
7.75	441.422					8	0.593135
7.75	1241.04					9	0.593135
10.75	1241.04					9	0
10.75	551.071					9	0.593135
10	551.071					8.5	0.593135
10	0					8.5	1.244
10	551.071					7.5	1.244
11.5	551.071					7.5	5.7936
11.5	249.51					10.5	5.7936
11	249.51					10.5	2.34771
11	0					10	2.34771
11	249.51					10	0
12	249.51					10	2.34771
12	0					11	2.34771
12	249.51					11	0
11.5	249.51					11	2.34771
11.5	551.071					10.5	2.34771
10.75	551.071					10.5	5.7936
10.75	1241.04					9	5.7936
9.25	1241.04					9	14.8645
9.25	5116.68					5.625	14.8645
6.125	5116.68					5.625	69.5003
						26.8672	69.5003
						26.8672	49.8549
						19.2656	49.8549
						19.2656	12.9579
						14.7188	12.9579
						14.7188	6.66458
						12.75	6.66458
						12.75	1.86228
						12	1.86228
						12	0
						12	1.86228
						13.5	1.86228
						13.5	0.948049
						13	0.948049
						13	0
						13	0.948049
						14	0.948049
						14	0
						14	0.948049
						13.5	0.948049
						13.5	1.86228
						12.75	1.86228
						12.75	6.66458
						16.6875	6.66458
						16.6875	4.47323
						15.5	4.47323
						15.5	2.28692
						15	2.28692
						15	0
						15	2.28692
						16	2.28692
						16	0
						16	2.28692
						15.5	2.28692
						15.5	4.47323
						17.875	4.47323
						17.875	2.37261
						17	2.37261
						17	0
						17	2.37261
						18.75	2.37261
						18.75	1.7732
						18	1.7732
						18	0
						18	1.7732
						19.5	1.7732
						19.5	1.05053
						19	1.05053
						19	0
						19	1.05053
						20	1.05053
						20	0
						20	1.05053
						19.5	1.05053
						19.5	1.7732
						18.75	1.7732
						18.75	2.37261
						17.875	2.37261
						17.875	4.47323
						16.6875	4.47323
						16.6875	6.66458
						14.7188	6.66458
						14.7188	12.9579
						23.8125	12.9579
						23.8125	9.68779
						21.5	9.68779
						21.5	3.57023
						21	3.57023
						21	0
						21	3.57023
						22	3.57023
						22	0
						22	3.57023
						21.5	3.57023
						21.5	9.68779
						26.125	9.68779
						26.125	4.13494
						24.5	4.13494
						24.5	2.67478
						23.5	2.67478
						23.5	1.36817
						23	1.36817
						23	0
						23	1.36817
						24	1.36817
						24	0
						24	1.36817
						23.5	1.36817
						23.5	2.67478
						25.5	2.67478
						25.5	1.3744
						25	1.3744
						25	0
						25	1.3744
						26	1.3744
						26	0
						26	1.3744
						25.5	1.3744
						25.5	2.67478
						24.5	2.67478
						24.5	4.13494
						27.75	4.13494
						27.75	2.7342
						27	2.7342
						27	0
						27	2.7342
						28.5	2.7342
						28.5	0.520813
						28	0.520813
						28	0
						28	0.520813
						29	0.520813
						29	0
						29	0.520813
						28.5	0.520813
						28.5	2.7342
						27.75	2.7342
						27.75	4.13494
						26.125	4.13494
						26.125	9.68779
						23.8125	9.68779
						23.8125	12.9579
						19.2656	12.9579
						19.2656	49.8549
						34.4688	49.8549
						34.4688	13.1283
						31.25	13.1283
						31.25	4.17094
						30	4.17094
						30	0
						30	4.17094
						32.5	4.17094
						32.5	3.67782
						31.5	3.67782
						31.5	1.08821
						31	1.08821
						31	0
						31	1.08821
						32	1.08821
						32	0
						32	1.08821
						31.5	1.08821
						31.5	3.67782
						33.5	3.67782
						33.5	1.55032
						33	1.55032
						33	0
						33	1.55032
						34	1.55032
						34	0
						34	1.55032
						33.5	1.55032
						33.5	3.67782
						32.5	3.67782
						32.5	4.17094
						31.25	4.17094
						31.25	13.1283
						37.6875	13.1283
						37.6875	9.46649
						35.75	9.46649
						35.75	3.88866
						35	3.88866
						35	0
						35	3.88866
						36.5	3.88866
						36.5	2.4509
						36	2.4509
						36	0
						36	2.4509
						37	2.4509
						37	0
						37	2.4509
						36.5	2.4509
						36.5	3.88866
						35.75	3.88866
						35.75	9.46649
						39.625	9.46649
						39.625	5.14789
						38.5	5.14789
						38.5	1.69869
						38	1.69869
						38	0
						38	1.69869
						39	1.69869
						39	0
						39	1.69869
						38.5	1.69869
						38.5	5.14789
						40.75	5.14789
						40.75	2.89692
						40	2.89692
						40	0
						40	2.89692
						41.5	2.89692
						41.5	1.57855
						41	1.57855
						41	0
						41	1.57855
						42	1.57855
						42	0
						42	1.57855
						41.5	1.57855
						41.5	2.89692
						40.75	2.89692
						40.75	5.14789
						39.625	5.14789
						39.625	9.46649
						37.6875	9.46649
						37.6875	13.1283
						34.4688	13.1283
						34.4688	49.8549
						26.8672	49.8549
						26.8672	69.5003
						16.2461	69.5003
						16.2461	327.448
						88.6396	327.448
						88.6396	86.6648
						57.8477	86.6648
						57.8477	32.4789
						48.25	32.4789
						48.25	12.3516
						44.5625	12.3516
						44.5625	5.3558
						43	5.3558
						43	0
						43	5.3558
						46.125	5.3558
						46.125	1.87838
						44.75	1.87838
						44.75	0.598536
						44	0.598536
						44	0
						44	0.598536
						45.5	0.598536
						45.5	0.46975
						45	0.46975
						45	0
						45	0.46975
						46	0.46975
						46	0
						46	0.46975
						45.5	0.46975
						45.5	0.598536
						44.75	0.598536
						44.75	1.87838
						47.5	1.87838
						47.5	1.16619
						47	1.16619
						47	0
						47	1.16619
						48	1.16619
						48	0
						48	1.16619
						47.5	1.16619
						47.5	1.87838
						46.125	1.87838
						46.125	5.3558
						44.5625	5.3558
						44.5625	12.3516
						51.9375	12.3516
						51.9375	5.90881
						49.75	5.90881
						49.75	1.16068
						49	1.16068
						49	0
						49	1.16068
						50.5	1.16068
						50.5	0.755142
						50	0.755142
						50	0
						50	0.755142
						51	0.755142
						51	0
						51	0.755142
						50.5	0.755142
						50.5	1.16068
						49.75	1.16068
						49.75	5.90881
						54.125	5.90881
						54.125	3.0608
						52.75	3.0608
						52.75	0.6591
						52	0.6591
						52	0
						52	0.6591
						53.5	0.6591
						53.5	0.408169
						53	0.408169
						53	0
						53	0.408169
						54	0.408169
						54	0
						54	0.408169
						53.5	0.408169
						53.5	0.6591
						52.75	0.6591
						52.75	3.0608
						55.5	3.0608
						55.5	1.30806
						55	1.30806
						55	0
						55	1.30806
						56	1.30806
						56	0
						56	1.30806
						55.5	1.30806
						55.5	3.0608
						54.125	3.0608
						54.125	5.90881
						51.9375	5.90881
						51.9375	12.3516
						48.25	12.3516
						48.25	32.4789
						67.4453	32.4789
						67.4453	22.0048
						62.5312	22.0048
						62.5312	6.42033
						59.6875	6.42033
						59.6875	3.20611
						57.875	3.20611
						57.875	1.44969
						57	1.44969
						57	0
						57	1.44969
						58.75	1.44969
						58.75	0.913891
						58	0.913891
						58	0
						58	0.913891
						59.5	0.913891
						59.5	0.690932
						59	0.690932
						59	0
						59	0.690932
						60	0.690932
						60	0
						60	0.690932
						59.5	0.690932
						59.5	0.913891
						58.75	0.913891
						58.75	1.44969
						57.875	1.44969
						57.875	3.20611
						61.5	3.20611
						61.5	2.14419
						61	2.14419
						61	0
						61	2.14419
						62	2.14419
						62	0
						62	2.14419
						61.5	2.14419
						61.5	3.20611
						59.6875	3.20611
						59.6875	6.42033
						65.375	6.42033
						65.375	4.81931
						63.5	4.81931
						63.5	1.22721
						63	1.22721
						63	0
						63	1.22721
						64	1.22721
						64	0
						64	1.22721
						63.5	1.22721
						63.5	4.81931
						67.25	4.81931
						67.25	2.98391
						65.75	2.98391
						65.75	0.720915
						65	0.720915
						65	0
						65	0.720915
						66.5	0.720915
						66.5	0.472929
						66	0.472929
						66	0
						66	0.472929
						67	0.472929
						67	0
						67	0.472929
						66.5	0.472929
						66.5	0.720915
						65.75	0.720915
						65.75	2.98391
						68.75	2.98391
						68.75	0.936292
						68	0.936292
						68	0
						68	0.936292
						69.5	0.936292
						69.5	0.605393
						69	0.605393
						69	0
						69	0.605393
						70	0.605393
						70	0
						70	0.605393
						69.5	0.605393
						69.5	0.936292
						68.75	0.936292
						68.75	2.98391
						67.25	2.98391
						67.25	4.81931
						65.375	4.81931
						65.375	6.42033
						62.5312	6.42033
						62.5312	22.0048
						72.3594	22.0048
						72.3594	14.0315
						71	14.0315
						71	0
						71	14.0315
						73.7188	14.0315
						73.7188	6.54877
						72.5	6.54877
						72.5	1.9788
						72	1.9788
						72	0
						72	1.9788
						73	1.9788
						73	0
						73	1.9788
						72.5	1.9788
						72.5	6.54877
						74.9375	6.54877
						74.9375	4.50528
						74	4.50528
						74	0
						74	4.50528
						75.875	4.50528
						75.875	1.92668
						75	1.92668
						75	0
						75	1.92668
						76.75	1.92668
						76.75	1.32969
						76	1.32969
						76	0
						76	1.32969
						77.5	1.32969
						77.5	0.569265
						77	0.569265
						77	0
						77	0.569265
						78	0.569265
						78	0
						78	0.569265
						77.5	0.569265
						77.5	1.32969
						76.75	1.32969
						76.75	1.92668
						75.875	1.92668
						75.875	4.50528
						74.9375	4.50528
						74.9375	6.54877
						73.7188	6.54877
						73.7188	14.0315
						72.3594	14.0315
						72.3594	22.0048
						67.4453	22.0048
						67.4453	32.4789
						57.8477	32.4789
						57.8477	86.6648
						119.432	86.6648
						119.432	77.8057
						91.6406	77.8057
						91.6406	26.1938
						83.875	26.1938
						83.875	7.60103
						80.6875	7.60103
						80.6875	3.26044
						79.5	3.26044
						79.5	0.994295
						79	0.994295
						79	0
						79	0.994295
						80	0.994295
						80	0
						80	0.994295
						79.5	0.994295
						79.5	3.26044
						81.875	3.26044
						81.875	2.35602
						81	2.35602
						81	0
						81	2.35602
						82.75	2.35602
						82.75	1.27681
						82	1.27681
						82	0
						82	1.27681
						83.5	1.27681
						83.5	0.63082
						83	0.63082
						83	0
						83	0.63082
						84	0.63082
						84	0
						84	0.63082
						83.5	0.63082
						83.5	1.27681
						82.75	1.27681
						82.75	2.35602
						81.875	2.35602
						81.875	3.26044
						80.6875	3.26044
						80.6875	7.60103
						87.0625	7.60103
						87.0625	4.80225
						85.5	4.80225
						85.5	0.589699
						85	0.589699
						85	0
						85	0.589699
						86	0.589699
						86	0
						86	0.589699
						85.5	0.589699
						85.5	4.80225
						88.625	4.80225
						88.625	2.35848
						87.5	2.35848
						87.5	0.935963
						87	0.935963
						87	0
						87	0.935963
						88	0.935963
						88	0
						88	0.935963
						87.5	0.935963
						87.5	2.35848
						89.75	2.35848
						89.75	1.22985
						89	1.22985
						89	0
						89	1.22985
						90.5	1.22985
						90.5	0.465917
						90	0.465917
						90	0
						90	0.465917
						91	0.465917
						91	0
						91	0.465917
						90.5	0.465917
						90.5	1.22985
						89.75	1.22985
						89.75	2.35848
						88.625	2.35848
						88.625	4.80225
						87.0625	4.80225
						87.0625	7.60103
						83.875	7.60103
						83.875	26.1938
						99.4062	26.1938
						99.4062	19.4044
						94	19.4044
						94	5.97782
						92.5	5.97782
						92.5	1.85565
						92	1.85565
						92	0
						92	1.85565
						93	1.85565
						93	0
						93	1.85565
						92.5	1.85565
						92.5	5.97782
						95.5	5.97782
						95.5	2.59333
						94.5	2.59333
						94.5	1.56835
						94	1.56835
						94	0
						94	1.56835
						95	1.56835
						95	0
						95	1.56835
						94.5	1.56835
						94.5	2.59333
						96.5	2.59333
						96.5	1.96995
						96	1.96995
						96	0
						96	1.96995
						97	1.96995
						97	0
						97	1.96995
						96.5	1.96995
						96.5	2.59333
						95.5	2.59333
						95.5	5.97782
						94	5.97782
						94	19.4044
						104.812	19.4044
						104.812	11.0973
						100.312	11.0973
						100.312	3.02984
						98.75	3.02984
						98.75	1.3846
						98	1.3846
						98	0
						98	1.3846
						99.5	1.3846
						99.5	0.919714
						99	0.919714
						99	0
						99	0.919714
						100	0.919714
						100	0
						100	0.919714
						99.5	0.919714
						99.5	1.3846
						98.75	1.3846
						98.75	3.02984
						101.875	3.02984
						101.875	2.52972
						101	2.52972
						101	0
						101	2.52972
						102.75	2.52972
						102.75	1.5446
						102	1.5446
						102	0
						102	1.5446
						103.5	1.5446
						103.5	0.644005
						103	0.644005
						103	0
						103	0.644005
						104	0.644005
						104	0
						104	0.644005
						103.5	0.644005
						103.5	1.5446
						102.75	1.5446
						102.75	2.52972
						101.875	2.52972
						101.875	3.02984
						100.312	3.02984
						100.312	11.0973
						109.312	11.0973
						109.312	3.80919
						105.875	3.80919
						105.875	1.85424
						105	1.85424
						105	0
						105	1.85424
						106.75	1.85424
						106.75	1.32298
						106	1.32298
						106	0
						106	1.32298
						107.5	1.32298
						107.5	0.420022
						107	0.420022
						107	0
						107	0.420022
						108	0.420022
						108	0
						108	0.420022
						107.5	0.420022
						107.5	1.32298
						106.75	1.32298
						106.75	1.85424
						105.875	1.85424
						105.875	3.80919
						112.75	3.80919
						112.75	3.39887
						110.625	3.39887
						110.625	2.08428
						109.5	2.08428
						109.5	0.633116
						109	0.633116
						109	0
						109	0.633116
						110	0.633116
						110	0
						110	0.633116
						109.5	0.633116
						109.5	2.08428
						111.75	2.08428
						111.75	1.16607
						111	1.16607
						111	0
						111	1.16607
						112.5	1.16607
						112.5	0.615175
						112	0.615175
						112	0
						112	0.615175
						113	0.615175
						113	0
						113	0.615175
						112.5	0.615175
						112.5	1.16607
						111.75	1.16607
						111.75	2.08428
						110.625	2.08428
						110.625	3.39887
						114.875	3.39887
						114.875	2.60983
						114	2.60983
						114	0
						114	2.60983
						115.75	2.60983
						115.75	0.525536
						115	0.525536
						115	0
						115	0.525536
						116.5	0.525536
						116.5	0.294271
						116	0.294271
						116	0
						116	0.294271
						117	0.294271
						117	0
						117	0.294271
						116.5	0.294271
						116.5	0.525536
						115.75	0.525536
						115.75	2.60983
						114.875	2.60983
						114.875	3.39887
						112.75	3.39887
						112.75	3.80919
						109.312	3.80919
						109.312	11.0973
						104.812	11.0973
						104.812	19.4044
						99.4062	19.4044
						99.4062	26.1938
						91.6406	26.1938
						91.6406	77.8057
						147.223	77.8057
						147.223	38.4886
						130.75	38.4886
						130.75	8.28483
						123.906	8.28483
						123.906	3.93379
						120.938	3.93379
						120.938	1.44568
						118.75	1.44568
						118.75	0.626595
						118	0.626595
						118	0
						118	0.626595
						119.5	0.626595
						119.5	0.501161
						119	0.501161
						119	0
						119	0.501161
						120	0.501161
						120	0
						120	0.501161
						119.5	0.501161
						119.5	0.626595
						118.75	0.626595
						118.75	1.44568
						123.125	1.44568
						123.125	1.04267
						121.75	1.04267
						121.75	0.460091
						121	0.460091
						121	0
						121	0.460091
						122.5	0.460091
						122.5	0.304443
						122	0.304443
						122	0
						122	0.304443
						123	0.304443
						123	0
						123	0.304443
						122.5	0.304443
						122.5	0.460091
						121.75	0.460091
						121.75	1.04267
						124.5	1.04267
						124.5	0.471205
						124	0.471205
						124	0
						124	0.471205
						125	0.471205
						125	0
						125	0.471205
						124.5	0.471205
						124.5	1.04267
						123.125	1.04267
						123.125	1.44568
						120.938	1.44568
						120.938	3.93379
						126.875	3.93379
						126.875	2.27813
						126	2.27813
						126	0
						126	2.27813
						127.75	2.27813
						127.75	1.31301
						127	1.31301
						127	0
						127	1.31301
						128.5	1.31301
						128.5	0.580527
						128	0.580527
						128	0
						128	0.580527
						129	0.580527
						129	0
						129	0.580527
						128.5	0.580527
						128.5	1.31301
						127.75	1.31301
						127.75	2.27813
						126.875	2.27813
						126.875	3.93379
						123.906	3.93379
						123.906	8.28483
						137.594	8.28483
						137.594	6.57476
						133.906	6.57476
						133.906	3.68161
						131.312	3.68161
						131.312	1.49316
						130	1.49316
						130	0
						130	1.49316
						132.625	1.49316
						132.625	0.88225
						131.5	0.88225
						131.5	0.397391
						131	0.397391
						131	0
						131	0.397391
						132	0.397391
						132	0
						132	0.397391
						131.5	0.397391
						131.5	0.88225
						133.75	0.88225
						133.75	0.529487
						133	0.529487
						133	0
						133	0.529487
						134.5	0.529487
						134.5	0.421544
						134	0.421544
						134	0
						134	0.421544
						135	0.421544
						135	0
						135	0.421544
						134.5	0.421544
						134.5	0.529487
						133.75	0.529487
						133.75	0.88225
						132.625	0.88225
						132.625	1.49316
						131.312	1.49316
						131.312	3.68161
						136.5	3.68161
						136.5	1.66444
						136	1.66444
						136	0
						136	1.66444
						137	1.66444
						137	0
						137	1.66444
						136.5	1.66444
						136.5	3.68161
						133.906	3.68161
						133.906	6.57476
						141.281	6.57476
						141.281	3.89824
						138.875	3.89824
						138.875	1.69686
						138	1.69686
						138	0
						138	1.69686
						139.75	1.69686
						139.75	0.921175
						139	0.921175
						139	0
						139	0.921175
						140.5	0.921175
						140.5	0.561977
						140	0.561977
						140	0
						140	0.561977
						141	0.561977
						141	0
						141	0.561977
						140.5	0.561977
						140.5	0.921175
						139.75	0.921175
						139.75	1.69686
						138.875	1.69686
						138.875	3.89824
						143.688	3.89824
						143.688	1.79703
						142.5	1.79703
						142.5	0.805461
						142	0.805461
						142	0
						142	0.805461
						143	0.805461
						143	0
						143	0.805461
						142.5	0.805461
						142.5	1.79703
						144.875	1.79703
						144.875	0.993177
						144	0.993177
						144	0
						144	0.993177
						145.75	0.993177
						145.75	0.512736
						145	0.512736
						145	0
						145	0.512736
						146.5	0.512736
						146.5	0.332483
						146	0.332483
						146	0
						146	0.332483
						147	0.332483
						147	0
						147	0.332483
						146.5	0.332483
						146.5	0.512736
						145.75	0.512736
						145.75	0.993177
						144.875	0.993177
						144.875	1.79703
						143.688	1.79703
						143.688	3.89824
						141.281	3.89824
						141.281	6.57476
						137.594	6.57476
						137.594	8.28483
						130.75	8.28483
						130.75	38.4886
						163.695	38.4886
						163.695	15.5116
						157.359	15.5116
						157.359	7.81389
						152.094	7.81389
						152.094	5.49748
						149.5	5.49748
						149.5	1.96237
						148.5	1.96237
						148.5	0.588356
						148	0.588356
						148	0
						148	0.588356
						149	0.588356
						149	0
						149	0.588356
						148.5	0.588356
						148.5	1.96237
						150.5	1.96237
						150.5	1.2084
						150	1.2084
						150	0
						150	1.2084
						151	1.2084
						151	0
						151	1.2084
						150.5	1.2084
						150.5	1.96237
						149.5	1.96237
						149.5	5.49748
						154.688	5.49748
						154.688	2.92864
						152.75	2.92864
						152.75	1.60442
						152	1.60442
						152	0
						152	1.60442
						153.5	1.60442
						153.5	0.555746
						153	0.555746
						153	0
						153	0.555746
						154	0.555746
						154	0
						154	0.555746
						153.5	0.555746
						153.5	1.60442
						152.75	1.60442
						152.75	2.92864
						156.625	2.92864
						156.625	2.37661
						155.5	2.37661
						155.5	0.615225
						155	0.615225
						155	0
						155	0.615225
						156	0.615225
						156	0
						156	0.615225
						155.5	0.615225
						155.5	2.37661
						157.75	2.37661
						157.75	1.93988
						157	1.93988
						157	0
						157	1.93988
						158.5	1.93988
						158.5	0.750496
						158	0.750496
						158	0
						158	0.750496
						159	0.750496
						159	0
						159	0.750496
						158.5	0.750496
						158.5	1.93988
						157.75	1.93988
						157.75	2.37661
						156.625	2.37661
						156.625	2.92864
						154.688	2.92864
						154.688	5.49748
						152.094	5.49748
						152.094	7.81389
						162.625	7.81389
						162.625	6.01159
						160.75	6.01159
						160.75	1.64764
						160	1.64764
						160	0
						160	1.64764
						161.5	1.64764
						161.5	0.85726
						161	0.85726
						161	0
						161	0.85726
						162	0.85726
						162	0
						162	0.85726
						161.5	0.85726
						161.5	1.64764
						160.75	1.64764
						160.75	6.01159
						164.5	6.01159
						164.5	2.03273
						163.5	2.03273
						163.5	0.80754
						163	0.80754
						163	0
						163	0.80754
						164	0.80754
						164	0
						164	0.80754
						163.5	0.80754
						163.5	2.03273
						165.5	2.03273
						165.5	1.2521
						165	1.2521
						165	0
						165	1.2521
						166	1.2521
						166	0
						166	1.2521
						165.5	1.2521
						165.5	2.03273
						164.5	2.03273
						164.5	6.01159
						162.625	6.01159
						162.625	7.81389
						157.359	7.81389
						157.359	15.5116
						170.031	15.5116
						170.031	11.1977
						167.75	11.1977
						167.75	4.20456
						167	4.20456
						167	0
						167	4.20456
						168.5	4.20456
						168.5	2.30872
						168	2.30872
						168	0
						168	2.30872
						169	2.30872
						169	0
						169	2.30872
						168.5	2.30872
						168.5	4.20456
						167.75	4.20456
						167.75	11.1977
						172.312	11.1977
						172.312	6.31001
						170.5	6.31001
						170.5	1.33975
						170	1.33975
						170	0
						170	1.33975
						171	1.33975
						171	0
						171	1.33975
						170.5	1.33975
						170.5	6.31001
						174.125	6.31001
						174.125	5.09387
						172.75	5.09387
						172.75	2.03243
						172	2.03243
						172	0
						172	2.03243
						173.5	2.03243
						173.5	0.357304
						173	0.357304
						173	0
						173	0.357304
						174	0.357304
						174	0
						174	0.357304
						173.5	0.357304
						173.5	2.03243
						172.75	2.03243
						172.75	5.09387
						175.5	5.09387
						175.5	2.28345
						175	2.28345
						175	0
						175	2.28345
						176	2.28345
						176	0
						176	2.28345
						175.5	2.28345
						175.5	5.09387
						174.125	5.09387
						174.125	6.31001
						172.312	6.31001
						172.312	11.1977
						170.031	11.1977
						170.031	15.5116
						163.695	15.5116
						163.695	38.4886
						147.223	38.4886
						147.223	77.8057
						119.432	77.8057
						119.432	86.6648
						88.6396	86.6648
						88.6396	327.448
						52.4429	327.448
						52.4429	4226.86
						289.77	4226.86
						289.77	719.452
						210.053	719.452
						210.053	207.719
						187.945	207.719
						187.945	121.891
						180.328	121.891
						180.328	17.8111
						177.875	17.8111
						177.875	3.57908
						177	3.57908
						177	0
						177	3.57908
						178.75	3.57908
						178.75	0.926354
						178	0.926354
						178	0
						178	0.926354
						179.5	0.926354
						179.5	0.686865
						179	0.686865
						179	0
						179	0.686865
						180	0.686865
						180	0
						180	0.686865
						179.5	0.686865
						179.5	0.926354
						178.75	0.926354
						178.75	3.57908
						177.875	3.57908
						177.875	17.8111
						182.781	17.8111
						182.781	3.97402
						181.5	3.97402
						181.5	0.392945
						181	0.392945
						181	0
						181	0.392945
						182	0.392945
						182	0
						182	0.392945
						181.5	0.392945
						181.5	3.97402
						184.062	3.97402
						184.062	2.35682
						183	2.35682
						183	0
						183	2.35682
						185.125	2.35682
						185.125	1.77783
						184	1.77783
						184	0
						184	1.77783
						186.25	1.77783
						186.25	0.542723
						185	0.542723
						185	0
						185	0.542723
						187.5	0.542723
						187.5	0.111564
						186.5	0.111564
						186.5	0.0344407
						186	0.0344407
						186	0
						186	0.0344407
						187	0.0344407
						187	0
						187	0.0344407
						186.5	0.0344407
						186.5	0.111564
						188.5	0.111564
						188.5	0.0929532
						188	0.0929532
						188	0
						188	0.0929532
						189	0.0929532
						189	0
						189	0.0929532
						188.5	0.0929532
						188.5	0.111564
						187.5	0.111564
						187.5	0.542723
						186.25	0.542723
						186.25	1.77783
						185.125	1.77783
						185.125	2.35682
						184.062	2.35682
						184.062	3.97402
						182.781	3.97402
						182.781	17.8111
						180.328	17.8111
						180.328	121.891
						195.562	121.891
						195.562	34.4977
						192	34.4977
						192	13.2917
						190.5	13.2917
						190.5	1.89474
						190	1.89474
						190	0
						190	1.89474
						191	1.89474
						191	0
						191	1.89474
						190.5	1.89474
						190.5	13.2917
						193.5	13.2917
						193.5	2.28725
						192.5	2.28725
						192.5	1.12912
						192	1.12912
						192	0
						192	1.12912
						193	1.12912
						193	0
						193	1.12912
						192.5	1.12912
						192.5	2.28725
						194.5	2.28725
						194.5	1.70598
						194	1.70598
						194	0
						194	1.70598
						195	1.70598
						195	0
						195	1.70598
						194.5	1.70598
						194.5	2.28725
						193.5	2.28725
						193.5	13.2917
						192	13.2917
						192	34.4977
						199.125	34.4977
						199.125	21.5053
						197.5	21.5053
						197.5	2.87849
						196.5	2.87849
						196.5	1.20602
						196	1.20602
						196	0
						196	1.20602
						197	1.20602
						197	0
						197	1.20602
						196.5	1.20602
						196.5	2.87849
						198.5	2.87849
						198.5	1.93674
						198	1.93674
						198	0
						198	1.93674
						199	1.93674
						199	0
						199	1.93674
						198.5	1.93674
						198.5	2.87849
						197.5	2.87849
						197.5	21.5053
						200.75	21.5053
						200.75	5.56296
						200	5.56296
						200	0
						200	5.56296
						201.5	5.56296
						201.5	3.38276
						201	3.38276
						201	0
						201	3.38276
						202	3.38276
						202	0
						202	3.38276
						201.5	3.38276
						201.5	5.56296
						200.75	5.56296
						200.75	21.5053
						199.125	21.5053
						199.125	34.4977
						195.562	34.4977
						195.562	121.891
						187.945	121.891
						187.945	207.719
						232.16	207.719
						232.16	174.256
						212.039	174.256
						212.039	51.4283
						206.188	51.4283
						206.188	14.0196
						203.875	14.0196
						203.875	3.03844
						203	3.03844
						203	0
						203	3.03844
						204.75	3.03844
						204.75	1.95943
						204	1.95943
						204	0
						204	1.95943
						205.5	1.95943
						205.5	0.518656
						205	0.518656
						205	0
						205	0.518656
						206	0.518656
						206	0
						206	0.518656
						205.5	0.518656
						205.5	1.95943
						204.75	1.95943
						204.75	3.03844
						203.875	3.03844
						203.875	14.0196
						208.5	14.0196
						208.5	13.2183
						207.5	13.2183
						207.5	2.28456
						207	2.28456
						207	0
						207	2.28456
						208	2.28456
						208	0
						208	2.28456
						207.5	2.28456
						207.5	13.2183
						209.5	13.2183
						209.5	2.41022
						209	2.41022
						209	0
						209	2.41022
						210	2.41022
						210	0
						210	2.41022
						209.5	2.41022
						209.5	13.2183
						208.5	13.2183
						208.5	14.0196
						206.188	14.0196
						206.188	51.4283
						217.891	51.4283
						217.891	25.9849
						213.312	25.9849
						213.312	5.98288
						211.75	5.98288
						211.75	3.30252
						211	3.30252
						211	0
						211	3.30252
						212.5	3.30252
						212.5	2.43212
						212	2.43212
						212	0
						212	2.43212
						213	2.43212
						213	0
						213	2.43212
						212.5	2.43212
						212.5	3.30252
						211.75	3.30252
						211.75	5.98288
						214.875	5.98288
						214.875	4.01018
						214	4.01018
						214	0
						214	4.01018
						215.75	4.01018
						215.75	0.661239
						215	0.661239
						215	0
						215	0.661239
						216.5	0.661239
						216.5	0.553709
						216	0.553709
						216	0
						216	0.553709
						217	0.553709
						217	0
						217	0.553709
						216.5	0.553709
						216.5	0.661239
						215.75	0.661239
						215.75	4.01018
						214.875	4.01018
						214.875	5.98288
						213.312	5.98288
						213.312	25.9849
						222.469	25.9849
						222.469	14.5898
						218.875	14.5898
						218.875	5.4672
						218	5.4672
						218	0
						218	5.4672
						219.75	5.4672
						219.75	4.08039
						219	4.08039
						219	0
						219	4.08039
						220.5	4.08039
						220.5	1.45962
						220	1.45962
						220	0
						220	1.45962
						221	1.45962
						221	0
						221	1.45962
						220.5	1.45962
						220.5	4.08039
						219.75	4.08039
						219.75	5.4672
						218.875	5.4672
						218.875	14.5898
						226.062	14.5898
						226.062	8.85178
						223.625	8.85178
						223.625	3.20303
						222.5	3.20303
						222.5	0.617739
						222	0.617739
						222	0
						222	0.617739
						223	0.617739
						223	0
						223	0.617739
						222.5	0.617739
						222.5	3.20303
						224.75	3.20303
						224.75	1.46213
						224	1.46213
						224	0
						224	1.46213
						225.5	1.46213
						225.5	0.525822
						225	0.525822
						225	0
						225	0.525822
						226	0.525822
						226	0
						226	0.525822
						225.5	0.525822
						225.5	1.46213
						224.75	1.46213
						224.75	3.20303
						223.625	3.20303
						223.625	8.85178
						228.5	8.85178
						228.5	6.62136
						227.5	6.62136
						227.5	1.6204
						227	1.6204
						227	0
						227	1.6204
						228	1.6204
						228	0
						228	1.6204
						227.5	1.6204
						227.5	6.62136
						229.5	6.62136
						229.5	2.59464
						229	2.59464
						229	0
						229	2.59464
						230	2.59464
						230	0
						230	2.59464
						229.5	2.59464
						229.5	6.62136
						228.5	6.62136
						228.5	8.85178
						226.062	8.85178
						226.062	14.5898
						222.469	14.5898
						222.469	25.9849
						217.891	25.9849
						217.891	51.4283
						212.039	51.4283
						212.039	174.256
						252.281	174.256
						252.281	98.9152
						241.656	98.9152
						241.656	45.8315
						236.844	45.8315
						236.844	9.67728
						233.938	9.67728
						233.938	3.94217
						231.75	3.94217
						231.75	2.09863
						231	2.09863
						231	0
						231	2.09863
						232.5	2.09863
						232.5	1.59824
						232	1.59824
						232	0
						232	1.59824
						233	1.59824
						233	0
						233	1.59824
						232.5	1.59824
						232.5	2.09863
						231.75	2.09863
						231.75	3.94217
						236.125	3.94217
						236.125	3.42572
						234.75	3.42572
						234.75	0.973337
						234	0.973337
						234	0
						234	0.973337
						235.5	0.973337
						235.5	0.745524
						235	0.745524
						235	0
						235	0.745524
						236	0.745524
						236	0
						236	0.745524
						235.5	0.745524
						235.5	0.973337
						234.75	0.973337
						234.75	3.42572
						237.5	3.42572
						237.5	1.3549
						237	1.3549
						237	0
						237	1.3549
						238	1.3549
						238	0
						238	1.3549
						237.5	1.3549
						237.5	3.42572
						236.125	3.42572
						236.125	3.94217
						233.938	3.94217
						233.938	9.67728
						239.75	9.67728
						239.75	5.95881
						239	5.95881
						239	0
						239	5.95881
						240.5	5.95881
						240.5	1.55335
						240	1.55335
						240	0
						240	1.55335
						241	1.55335
						241	0
						241	1.55335
						240.5	1.55335
						240.5	5.95881
						239.75	5.95881
						239.75	9.67728
						236.844	9.67728
						236.844	45.8315
						246.469	45.8315
						246.469	15.3141
						243.625	15.3141
						243.625	4.27344
						242.5	4.27344
						242.5	1.34036
						242	1.34036
						242	0
						242	1.34036
						243	1.34036
						243	0
						243	1.34036
						242.5	1.34036
						242.5	4.27344
						244.75	4.27344
						244.75	2.83747
						244	2.83747
						244	0
						244	2.83747
						245.5	2.83747
						245.5	1.06987
						245	1.06987
						245	0
						245	1.06987
						246	1.06987
						246	0
						246	1.06987
						245.5	1.06987
						245.5	2.83747
						244.75	2.83747
						244.75	4.27344
						243.625	4.27344
						243.625	15.3141
						249.312	15.3141
						249.312	9.86045
						247.75	9.86045
						247.75	2.42104
						247	2.42104
						247	0
						247	2.42104
						248.5	2.42104
						248.5	1.83603
						248	1.83603
						248	0
						248	1.83603
						249	1.83603
						249	0
						249	1.83603
						248.5	1.83603
						248.5	2.42104
						247.75	2.42104
						247.75	9.86045
						250.875	9.86045
						250.875	6.00543
						250	6.00543
						250	0
						250	6.00543
						251.75	6.00543
						251.75	2.0648
						251	2.0648
						251	0
						251	2.0648
						252.5	2.0648
						252.5	1.93752
						252	1.93752
						252	0
						252	1.93752
						253	1.93752
						253	0
						253	1.93752
						252.5	1.93752
						252.5	2.0648
						251.75	2.0648
						251.75	6.00543
						250.875	6.00543
						250.875	9.86045
						249.312	9.86045
						249.312	15.3141
						246.469	15.3141
						246.469	45.8315
						241.656	45.8315
						241.656	98.9152
						262.906	98.9152
						262.906	48.7586
						256.875	48.7586
						256.875	13.7152
						254.75	13.7152
						254.75	5.09345
						254	5.09345
						254	0
						254	5.09345
						255.5	5.09345
						255.5	3.00697
						255	3.00697
						255	0
						255	3.00697
						256	3.00697
						256	0
						256	3.00697
						255.5	3.00697
						255.5	5.09345
						254.75	5.09345
						254.75	13.7152
						259	13.7152
						259	8.51139
						257.5	8.51139
						257.5	2.65244
						257	2.65244
						257	0
						257	2.65244
						258	2.65244
						258	0
						258	2.65244
						257.5	2.65244
						257.5	8.51139
						260.5	8.51139
						260.5	3.34786
						259.5	3.34786
						259.5	0.974331
						259	0.974331
						259	0
						259	0.974331
						260	0.974331
						260	0
						260	0.974331
						259.5	0.974331
						259.5	3.34786
						261.5	3.34786
						261.5	1.84197
						261	1.84197
						261	0
						261	1.84197
						262	1.84197
						262	0
						262	1.84197
						261.5	1.84197
						261.5	3.34786
						260.5	3.34786
						260.5	8.51139
						259	8.51139
						259	13.7152
						256.875	13.7152
						256.875	48.7586
						268.938	48.7586
						268.938	30.441
						265.375	30.441
						265.375	7.24177
						263.5	7.24177
						263.5	4.72149
						263	4.72149
						263	0
						263	4.72149
						264	4.72149
						264	0
						264	4.72149
						263.5	4.72149
						263.5	7.24177
						267.25	7.24177
						267.25	6.06223
						265.75	6.06223
						265.75	1.77939
						265	1.77939
						265	0
						265	1.77939
						266.5	1.77939
						266.5	0.878325
						266	0.878325
						266	0
						266	0.878325
						267	0.878325
						267	0
						267	0.878325
						266.5	0.878325
						266.5	1.77939
						265.75	1.77939
						265.75	6.06223
						268.75	6.06223
						268.75	2.54698
						268	2.54698
						268	0
						268	2.54698
						269.5	2.54698
						269.5	1.24813
						269	1.24813
						269	0
						269	1.24813
						270	1.24813
						270	0
						270	1.24813
						269.5	1.24813
						269.5	2.54698
						268.75	2.54698
						268.75	6.06223
						267.25	6.06223
						267.25	7.24177
						265.375	7.24177
						265.375	30.441
						272.5	30.441
						272.5	10.8725
						271.5	10.8725
						271.5	3.37932
						271	3.37932
						271	0
						271	3.37932
						272	3.37932
						272	0
						272	3.37932
						271.5	3.37932
						271.5	10.8725
						273.5	10.8725
						273.5	4.47113
						273	4.47113
						273	0
						273	4.47113
						274	4.47113
						274	0
						274	4.47113
						273.5	4.47113
						273.5	10.8725
						272.5	10.8725
						272.5	30.441
						268.938	30.441
						268.938	48.7586
						262.906	48.7586
						262.906	98.9152
						252.281	98.9152
						252.281	174.256
						232.16	174.256
						232.16	207.719
						210.053	207.719
						210.053	719.452
						369.487	719.452
						369.487	410.743
						323.615	410.743
						323.615	56.0311
						292.52	56.0311
						292.52	27.8417
						277.75	27.8417
						277.75	6.64103
						275.5	6.64103
						275.5	0.703189
						275	0.703189
						275	0
						275	0.703189
						276	0.703189
						276	0
						276	0.703189
						275.5	0.703189
						275.5	6.64103
						280	6.64103
						280	3.54743
						277.875	3.54743
						277.875	1.87479
						277	1.87479
						277	0
						277	1.87479
						278.75	1.87479
						278.75	0.544977
						278	0.544977
						278	0
						278	0.544977
						279.5	0.544977
						279.5	0.0816137
						279	0.0816137
						279	0
						279	0.0816137
						280	0.0816137
						280	0
						280	0.0816137
						279.5	0.0816137
						279.5	0.544977
						278.75	0.544977
						278.75	1.87479
						277.875	1.87479
						277.875	3.54743
						282.125	3.54743
						282.125	2.17465
						281	2.17465
						281	0
						281	2.17465
						283.25	2.17465
						283.25	1.10867
						282	1.10867
						282	0
						282	1.10867
						284.5	1.10867
						284.5	0.709504
						283.5	0.709504
						283.5	0.215408
						283	0.215408
						283	0
						283	0.215408
						284	0.215408
						284	0
						284	0.215408
						283.5	0.215408
						283.5	0.709504
						285.5	0.709504
						285.5	0.393301
						285	0.393301
						285	0
						285	0.393301
						286	0.393301
						286	0
						286	0.393301
						285.5	0.393301
						285.5	0.709504
						284.5	0.709504
						284.5	1.10867
						283.25	1.10867
						283.25	2.17465
						282.125	2.17465
						282.125	3.54743
						280	3.54743
						280	6.64103
						277.75	6.64103
						277.75	27.8417
						307.289	27.8417
[truncated: 1,494 more rows]

## Sheet: Heat maps2_HID19
	WT_HFD1	WT_HFD3	WT_STD2	WT_STD3	WT_STD1	WT_HFD2	KO_STD2	KO_STD1	KO_STD3	KO_HFD3	KO_HFD1	KO_HFD2
Spata13	1	1	1	1	1	1	1	1	1	1	1	1
Hr	1	1	1	1	1	1	1	1	1	1	1	1
Avil	1	1	1	1	1	1	1	1	1	1	1	1
Tead3	1	1	1	1	1	1	1	1	1	1	1	1
Rnf39	1	1	1	1	1	1	1	1	1	1	1	1
Flrt3	1	1	1	1	1	1	1	1	1	1	1	1
Gsta4	1	1	1	1	1	1	1	1	1	1	1	1
Klf5	1	1	1	1	1	1	1	1	1	1	1	1
Igkj2	1	1	1	1	1	1	1	1	1	1	1	1
Inava	1	1	1	1	1	1	1	1	1	1	1	1
Ptch2	1	1	1	1	1	1	1	1	1	1	1	1
Dok7	1	1	1	1	1	1	1	1	1	1	1	1
Pappa2	1	1	1	1	1	1	1	1	1	1	1	1
Dpp10	1	1	1	1	1	1	1	1	1	1	1	1
Aatk	1	1	1	1	1	1	1	1	1	1	1	1
Adora1	1	1	1	1	1	1	1	1	1	1	1	1
Kalrn	1	1	1	1	1	1	1	1	1	1	1	1
Galnt4	1	1	1	1	1	1	1	1	1	1	1	1
Cldn4	1	1	1	1	1	1	1	1	1	1	1	1
Ugt2b34	1	1	1	1	1	1	1	1	1	1	1	1
Ror1	1	1	1	1	1	1	1	1	1	1	1	1
Baiap2	1	1	1	1	1	1	1	1	1	1	1	1
Nynrin	1	1	1	1	1	1	1	1	1	1	1	1
Lrp5	1	1	1	1	1	1	1	1	1	1	1	1
Itpr3	1	1	1	1	1	1	1	1	1	1	1	1
Ephb2	1	1	1	1	1	1	1	1	1	1	1	1
Gng7	1	1	1	1	1	1	1	1	1	1	1	1
Egflam	1	1	1	1	1	1	1	1	1	1	1	1
Mamld1	1	1	1	1	1	1	1	1	1	1	1	1
Rab38	1	1	1	1	1	1	1	1	1	1	1	1
Prom2	1	1	1	1	1	1	1	1	1	1	1	1
Col9a2	1	1	1	1	1	1	1	1	1	1	1	1
Hspb8	1	1	1	1	1	1	1	1	1	1	1	1
Sfrp5	1	1	1	1	1	1	1	1	1	1	1	1
Upk3a	1	1	1	1	1	1	1	1	1	1	1	1
Gm42902	1	1	1	1	1	1	1	1	1	1	1	1
Aard	1	1	1	1	1	1	1	1	1	1	1	1
Heg1	1	1	1	1	1	1	1	1	1	1	1	1
Usp29	1	1	1	1	1	1	1	1	1	1	1	1
Nrcam	1	1	1	1	1	1	1	1	1	1	1	1
Myo10	1	1	1	1	1	1	1	1	1	1	1	1
Tnik	1	1	1	1	1	1	1	1	1	1	1	1
St8sia1	1	1	1	1	1	1	1	1	1	1	1	1
Nr3c2	1	1	1	1	1	1	1	1	1	1	1	1
Prkca	1	1	1	1	1	1	1	1	1	1	1	1
Hmgcr	1	1	1	1	1	1	1	1	1	1	1	1
Unc80	1	1	1	1	1	1	1	1	1	1	1	1
Ret	1	1	1	1	1	1	1	1	1	1	1	1
Pcsk6	1	1	1	1	1	1	1	1	1	1	1	1
Emid1	1	1	1	1	1	1	1	1	1	1	1	1
H3f3aos	1	1	1	1	1	1	1	1	1	1	1	1
Carmil3	1	1	1	1	1	1	1	1	1	1	1	1
Srebf2	1	1	1	1	1	1	1	1	1	1	1	1
Trp53i11	1	1	1	1	1	1	1	1	1	1	1	1
Apc2	1	1	1	1	1	1	1	1	1	1	1	1
Rnf157	1	1	1	1	1	1	1	1	1	1	1	1
B4galnt4	1	1	1	1	1	1	1	1	1	1	1	1
Tox	1	1	1	1	1	1	1	1	1	1	1	1
Satb1	1	1	1	1	1	1	1	1	1	1	1	1
Asb16	1	1	1	1	1	1	1	1	1	1	1	1
Ntm	1	1	1	1	1	1	1	1	1	1	1	1
Myo15b	1	1	1	1	1	1	1	1	1	1	1	1
Cabp7	1	1	1	1	1	1	1	1	1	1	1	1
AC151284.1	1	1	1	1	1	1	1	1	1	1	1	1
Trim66	1	1	1	1	1	1	1	1	1	1	1	1
Kcnh1	1	1	1	1	1	1	1	1	1	1	1	1
Cntn1	1	1	1	1	1	1	1	1	1	1	1	1
Dock3	1	1	1	1	1	1	1	1	1	1	1	1
Slc4a10	1	1	1	1	1	1	1	1	1	1	1	1
Efcab9	1	1	1	1	1	1	1	1	1	1	1	1
Sez6l	1	1	1	1	1	1	1	1	1	1	1	1
Gad1	1	1	1	1	1	1	1	1	1	1	1	1
Ky	1	1	1	1	1	1	1	1	1	1	1	1
Fhod3	1	1	1	1	1	1	1	1	1	1	1	1
Abcb4	1	1	1	1	1	1	1	1	1	1	1	1
Fras1	1	1	1	1	1	1	1	1	1	1	1	1
Loxl2	1	1	1	1	1	1	1	1	1	1	1	1
Sdk1	1	1	1	1	1	1	1	1	1	1	1	1
Greb1l	1	1	1	1	1	1	1	1	1	1	1	1
Hapln1	1	1	1	1	1	1	1	1	1	1	1	1
Gm17733	1	1	1	1	1	1	1	1	1	1	1	1
Meltf	1	1	1	1	1	1	1	1	1	1	1	1
Nxph1	1	1	1	1	1	1	1	1	1	1	1	1
Rad51ap2	1	1	1	1	1	1	1	1	1	1	1	1
Sgcz	1	1	1	1	1	1	1	1	1	1	1	1
Hapln2	1	1	1	1	1	1	1	1	1	1	1	1
Tmem35a	1	1	1	1	1	1	1	1	1	1	1	1
Jam2	1	1	1	1	1	1	1	1	1	1	1	1
Otud7a	1	1	1	1	1	1	1	1	1	1	1	1
Il1r1	1	1	1	1	1	1	1	1	1	1	1	1
Ush2a	1	1	1	1	1	1	1	1	1	1	1	1
Vipr2	1	1	1	1	1	1	1	1	1	1	1	1
Slc4a7	1	1	1	1	1	1	1	1	1	1	1	1
Pde1c	1	1	1	1	1	1	1	1	1	1	1	1
St3gal1	1	1	1	1	1	1	1	1	1	1	1	1
Gpd2	1	1	1	1	1	1	1	1	1	1	1	1
Syt2	1	1	1	1	1	1	1	1	1	1	1	1
Slc12a7	1	1	1	1	1	1	1	1	1	1	1	1
Itpr2	1	1	1	1	1	1	1	1	1	1	1	1
Lmx1b	1	1	1	1	1	1	1	1	1	1	1	1
Slc6a19os	1	1	1	1	1	1	1	1	1	1	1	1
Sv2b	1	1	1	1	1	1	1	1	1	1	1	1
Baiap2l2	1	1	1	1	1	1	1	1	1	1	1	1
Slc6a19	1	1	1	1	1	1	1	1	1	1	1	1
Shisa2	1	1	1	1	1	1	1	1	1	1	1	1
Eya1	1	1	1	1	1	1	1	1	1	1	1	1
Slitrk6	1	1	1	1	1	1	1	1	1	1	1	1
Epha7	1	1	1	1	1	1	1	1	1	1	1	1
Nptx1	1	1	1	1	1	1	1	1	1	1	1	1
Slc35d3	1	1	1	1	1	1	1	1	1	1	1	1
Paupar	1	1	1	1	1	1	1	1	1	1	1	1
Ffar3	1	1	1	1	1	1	1	1	1	1	1	1
Adh1	1	1	1	1	1	1	1	1	1	1	1	1
Vwa5b1	1	1	1	1	1	1	1	1	1	1	1	1
2019-09-03	1	1	1	1	1	1	1	1	1	1	1	1
Bmpr1b	1	1	1	1	1	1	1	1	1	1	1	1
Pcsk9	1	1	1	1	1	1	1	1	1	1	1	1
Prrt3	1	1	1	1	1	1	1	1	1	1	1	1
Prob1	1	1	1	1	1	1	1	1	1	1	1	1
Rbfox3	1	1	1	1	1	1	1	1	1	1	1	1
St6galnac6	1	1	1	1	1	1	1	1	1	1	1	1
Abcd2	1	1	1	1	1	1	1	1	1	1	1	1
Jag2	1	1	1	1	1	1	1	1	1	1	1	1
Insrr	1	1	1	1	1	1	1	1	1	1	1	1
Mreg	1	1	1	1	1	1	1	1	1	1	1	1
Neurl1a	1	1	1	1	1	1	1	1	1	1	1	1
Lix1l	1	1	1	1	1	1	1	1	1	1	1	1
Kcnh8	1	1	1	1	1	1	1	1	1	1	1	1
Sptb	1	1	1	1	1	1	1	1	1	1	1	1
Slc24a2	1	1	1	1	1	1	1	1	1	1	1	1
Ptprt	1	1	1	1	1	1	1	1	1	1	1	1
Cib3	1	1	1	1	1	1	1	1	1	1	1	1
Kcnn2	1	1	1	1	1	1	1	1	1	1	1	1
Kcnip2	1	1	1	1	1	1	1	1	1	1	1	1
Cplx3	1	1	1	1	1	1	1	1	1	1	1	1
Podxl2	1	1	1	1	1	1	1	1	1	1	1	1
Ucn3	1	1	1	1	1	1	1	1	1	1	1	1
Trpm5	1	1	1	1	1	1	1	1	1	1	1	1
Fxyd6	1	1	1	1	1	1	1	1	1	1	1	1
Nt5dc2	1	1	1	1	1	1	1	1	1	1	1	1
Msi1	1	1	1	1	1	1	1	1	1	1	1	1
Stk33	1	1	1	1	1	1	1	1	1	1	1	1
Kirrel2	1	1	1	1	1	1	1	1	1	1	1	1
Clip4	1	1	1	1	1	1	1	1	1	1	1	1
Ttll11	1	1	1	1	1	1	1	1	1	1	1	1
Dact3	1	1	1	1	1	1	1	1	1	1	1	1
Gm16702	1	1	1	1	1	1	1	1	1	1	1	1
Tiparp	1	1	1	1	1	1	1	1	1	1	1	1
Mapk15	1	1	1	1	1	1	1	1	1	1	1	1
Rem2	1	1	1	1	1	1	1	1	1	1	1	1
Crhr1	1	1	1	1	1	1	1	1	1	1	1	1
B3gnt9	1	1	1	1	1	1	1	1	1	1	1	1
Csdc2	1	1	1	1	1	1	1	1	1	1	1	1
Dhcr24	1	1	1	1	1	1	1	1	1	1	1	1
Acot4	1	1	1	1	1	1	1	1	1	1	1	1
Tat	1	1	1	1	1	1	1	1	1	1	1	1
Akr1d1	1	1	1	1	1	1	1	1	1	1	1	1
Acot12	1	1	1	1	1	1	1	1	1	1	1	1
Fmo5	1	1	1	1	1	1	1	1	1	1	1	1
Proc	1	1	1	1	1	1	1	1	1	1	1	1
Rgn	1	1	1	1	1	1	1	1	1	1	1	1
Thrsp	1	1	1	1	1	1	1	1	1	1	1	1
Serpina1d	1	1	1	1	1	1	1	1	1	1	1	1
Ifi47	1	1	1	1	1	1	1	1	1	1	1	1
Adrb2	1	1	1	1	1	1	1	1	1	1	1	1
Nsg2	1	1	1	1	1	1	1	1	1	1	1	1
Ifi208	1	1	1	1	1	1	1	1	1	1	1	1
Sidt1	1	1	1	1	1	1	1	1	1	1	1	1
ccdc198	1	1	1	1	1	1	1	1	1	1	1	1
Pf4	1	1	1	1	1	1	1	1	1	1	1	1
Ighv5-12	1	1	1	1	1	1	1	1	1	1	1	1
Ighv4-1	1	1	1	1	1	1	1	1	1	1	1	1
Adhfe1	1	1	1	1	1	1	1	1	1	1	1	1
Nox4	1	1	1	1	1	1	1	1	1	1	1	1
Ak4	1	1	1	1	1	1	1	1	1	1	1	1
Cytl1	1	1	1	1	1	1	1	1	1	1	1	1
Bmp4	1	1	1	1	1	1	1	1	1	1	1	1
Ccl8	1	1	1	1	1	1	1	1	1	1	1	1
Emp1	1	1	1	1	1	1	1	1	1	1	1	1
Dcn	1	1	1	1	1	1	1	1	1	1	1	1
Dpep1	1	1	1	1	1	1	1	1	1	1	1	1
Cygb	1	1	1	1	1	1	1	1	1	1	1	1
Cdh11	1	1	1	1	1	1	1	1	1	1	1	1
Rtn4rl2	1	1	1	1	1	1	1	1	1	1	1	1
Lepr	1	1	1	1	1	1	1	1	1	1	1	1
Abi3bp	1	1	1	1	1	1	1	1	1	1	1	1
Reln	1	1	1	1	1	1	1	1	1	1	1	1
Col23a1	1	1	1	1	1	1	1	1	1	1	1	1
Adgrg3	1	1	1	1	1	1	1	1	1	1	1	1
Igkv13-85	1	1	1	1	1	1	1	1	1	1	1	1
Slpi	1	1	1	1	1	1	1	1	1	1	1	1
Igkv4-86	1	1	1	1	1	1	1	1	1	1	1	1
Cend1	1	1	1	1	1	1	1	1	1	1	1	1
Htr3a	1	1	1	1	1	1	1	1	1	1	1	1
Vip	1	1	1	1	1	1	1	1	1	1	1	1
Npy	1	1	1	1	1	1	1	1	1	1	1	1
Tac1	1	1	1	1	1	1	1	1	1	1	1	1
Stmn2	1	1	1	1	1	1	1	1	1	1	1	1
Sv2c	1	1	1	1	1	1	1	1	1	1	1	1
Hspa1b	1	1	1	1	1	1	1	1	1	1	1	1
Dpysl5	1	1	1	1	1	1	1	1	1	1	1	1
Gnai1	1	1	1	1	1	1	1	1	1	1	1	1
Slc30a1	1	1	1	1	1	1	1	1	1	1	1	1
Ffar4	1	1	1	1	1	1	1	1	1	1	1	1
Stxbp5l	1	1	1	1	1	1	1	1	1	1	1	1
Lpl	1	1	1	1	1	1	1	1	1	1	1	1
Ndst4	1	1	1	1	1	1	1	1	1	1	1	1
Cfh	1	1	1	1	1	1	1	1	1	1	1	1
Adcy5	1	1	1	1	1	1	1	1	1	1	1	1
Col8a2	1	1	1	1	1	1	1	1	1	1	1	1
C2cd4a	1	1	1	1	1	1	1	1	1	1	1	1
Peg10	1	1	1	1	1	1	1	1	1	1	1	1
Il6	1	1	1	1	1	1	1	1	1	1	1	1
Irx1	1	1	1	1	1	1	1	1	1	1	1	1
Hcar2	1	1	1	1	1	1	1	1	1	1	1	1
Apold1	1	1	1	1	1	1	1	1	1	1	1	1
Nr4a2	1	1	1	1	1	1	1	1	1	1	1	1
Serpine1	1	1	1	1	1	1	1	1	1	1	1	1
Cxcl10	1	1	1	1	1	1	1	1	1	1	1	1
Kcnip3	1	1	1	1	1	1	1	1	1	1	1	1
Oas1g	1	1	1	1	1	1	1	1	1	1	1	1
Socs3	1	1	1	1	1	1	1	1	1	1	1	1
Egr1	1	1	1	1	1	1	1	1	1	1	1	1
Fos	1	1	1	1	1	1	1	1	1	1	1	1
Nr4a1	1	1	1	1	1	1	1	1	1	1	1	1
Nr1d1	1	1	1	1	1	1	1	1	1	1	1	1
Pcdh8	1	1	1	1	1	1	1	1	1	1	1	1
Nr4a3	1	1	1	1	1	1	1	1	1	1	1	1
Mt1	1	1	1	1	1	1	1	1	1	1	1	1
Hlf	1	1	1	1	1	1	1	1	1	1	1	1
Disp2	1	1	1	1	1	1	1	1	1	1	1	1
Dlgap1	1	1	1	1	1	1	1	1	1	1	1	1
Trpm2	1	1	1	1	1	1	1	1	1	1	1	1
Dhcr7	1	1	1	1	1	1	1	1	1	1	1	1
Bmp1	1	1	1	1	1	1	1	1	1	1	1	1
Sptbn2	1	1	1	1	1	1	1	1	1	1	1	1
Serinc5	1	1	1	1	1	1	1	1	1	1	1	1
Pde7b	1	1	1	1	1	1	1	1	1	1	1	1
Tmem255a	1	1	1	1	1	1	1	1	1	1	1	1
Palld	1	1	1	1	1	1	1	1	1	1	1	1
Dglucy	1	1	1	1	1	1	1	1	1	1	1	1
Cftr	1	1	1	1	1	1	1	1	1	1	1	1
Adgrf1	1	1	1	1	1	1	1	1	1	1	1	1
Akap17b	1	1	1	1	1	1	1	1	1	1	1	1
Penk	1	1	1	1	1	1	1	1	1	1	1	1
Gpm6a	1	1	1	1	1	1	1	1	1	1	1	1
Rasgrp1	1	1	1	1	1	1	1	1	1	1	1	1
Ehhadh	1	1	1	1	1	1	1	1	1	1	1	1
Acss2	1	1	1	1	1	1	1	1	1	1	1	1
Slc40a1	1	1	1	1	1	1	1	1	1	1	1	1
Gm47431	1	1	1	1	1	1	1	1	1	1	1	1
Sh3gl2	1	1	1	1	1	1	1	1	1	1	1	1
Efcab5	1	1	1	1	1	1	1	1	1	1	1	1
Fam155a	1	1	1	1	1	1	1	1	1	1	1	1
Il1rap	1	1	1	1	1	1	1	1	1	1	1	1
Dnm3	1	1	1	1	1	1	1	1	1	1	1	1
Scn9a	1	1	1	1	1	1	1	1	1	1	1	1
Grhl1	1	1	1	1	1	1	1	1	1	1	1	1
Slc26a3	1	1	1	1	1	1	1	1	1	1	1	1
Osbpl6	1	1	1	1	1	1	1	1	1	1	1	1
Dnah8	1	1	1	1	1	1	1	1	1	1	1	1
Rnf182	1	1	1	1	1	1	1	1	1	1	1	1
Lonrf3	1	1	1	1	1	1	1	1	1	1	1	1
Id4	1	1	1	1	1	1	1	1	1	1	1	1
Nebl	1	1	1	1	1	1	1	1	1	1	1	1
Map6	1	1	1	1	1	1	1	1	1	1	1	1
Chac1	1	1	1	1	1	1	1	1	1	1	1	1
Amigo2	1	1	1	1	1	1	1	1	1	1	1	1
Ikzf4	1	1	1	1	1	1	1	1	1	1	1	1
Ctxn1	1	1	1	1	1	1	1	1	1	1	1	1
Slc7a11	1	1	1	1	1	1	1	1	1	1	1	1
Reep1	1	1	1	1	1	1	1	1	1	1	1	1
Cemip2	1	1	1	1	1	1	1	1	1	1	1	1
Garnl3	1	1	1	1	1	1	1	1	1	1	1	1
Cpxm2	1	1	1	1	1	1	1	1	1	1	1	1
Sertm1	1	1	1	1	1	1	1	1	1	1	1	1
Ifitm1	1	1	1	1	1	1	1	1	1	1	1	1
Pilra	1	1	1	1	1	1	1	1	1	1	1	1
Capn9	1	1	1	1	1	1	1	1	1	1	1	1
Matn2	1	1	1	1	1	1	1	1	1	1	1	1
Exo5	1	1	1	1	1	1	1	1	1	1	1	1
Esr1	1	1	1	1	1	1	1	1	1	1	1	1
Gm27167	1	1	1	1	1	1	1	1	1	1	1	1
Stk32b	1	1	1	1	1	1	1	1	1	1	1	1
Cish	1	1	1	1	1	1	1	1	1	1	1	1
Ivd	1	1	1	1	1	1	1	1	1	1	1	1
Rph3a	1	1	1	1	1	1	1	1	1	1	1	1
Rtl10	1	1	1	1	1	1	1	1	1	1	1	1
Kcnk10	1	1	1	1	1	1	1	1	1	1	1	1
Ogdhl	1	1	1	1	1	1	1	1	1	1	1	1
B3galt1	1	1	1	1	1	1	1	1	1	1	1	1
Cspg5	1	1	1	1	1	1	1	1	1	1	1	1
A630076J17Rik	1	1	1	1	1	1	1	1	1	1	1	1
Lrrc55	1	1	1	1	1	1	1	1	1	1	1	1
Gpr26	1	1	1	1	1	1	1	1	1	1	1	1
Retnlg	1	1	1	1	1	1	1	1	1	1	1	1
Ceacam10	1	1	1	1	1	1	1	1	1	1	1	1
Rps6ka5	1	1	1	1	1	1	1	1	1	1	1	1
Kcnj5	1	1	1	1	1	1	1	1	1	1	1	1
Myo3a	1	1	1	1	1	1	1	1	1	1	1	1
Aqp4	1	1	1	1	1	1	1	1	1	1	1	1
Mrap2	1	1	1	1	1	1	1	1	1	1	1	1
Mpst	1	1	1	1	1	1	1	1	1	1	1	1
Rarres2	1	1	1	1	1	1	1	1	1	1	1	1
Pik3c2g	1	1	1	1	1	1	1	1	1	1	1	1
Epb41l4a	1	1	1	1	1	1	1	1	1	1	1	1
Psd4	1	1	1	1	1	1	1	1	1	1	1	1
Cit	1	1	1	1	1	1	1	1	1	1	1	1
Vgll4	1	1	1	1	1	1	1	1	1	1	1	1
Adgrg6	1	1	1	1	1	1	1	1	1	1	1	1
Phox2a	1	1	1	1	1	1	1	1	1	1	1	1
Olfr330	1	1	1	1	1	1	1	1	1	1	1	1
Igkv4-90	1	1	1	1	1	1	1	1	1	1	1	1
Insl6	1	1	1	1	1	1	1	1	1	1	1	1
Reg3b	1	1	1	1	1	1	1	1	1	1	1	1
Areg	1	1	1	1	1	1	1	1	1	1	1	1
Hspb1	1	1	1	1	1	1	1	1	1	1	1	1
Krtap17-1	1	1	1	1	1	1	1	1	1	1	1	1
Rmdn1	1	1	1	1	1	1	1	1	1	1	1	1
Acot9	1	1	1	1	1	1	1	1	1	1	1	1
Tyrobp	1	1	1	1	1	1	1	1	1	1	1	1
Clec12a	1	1	1	1	1	1	1	1	1	1	1	1
Gpx1	1	1	1	1	1	1	1	1	1	1	1	1
Ift20	1	1	1	1	1	1	1	1	1	1	1	1
Serpinb6a	1	1	1	1	1	1	1	1	1	1	1	1
Acyp2	1	1	1	1	1	1	1	1	1	1	1	1
Snhg11	1	1	1	1	1	1	1	1	1	1	1	1
Dynlt1a	1	1	1	1	1	1	1	1	1	1	1	1
Srp14	1	1	1	1	1	1	1	1	1	1	1	1
Rcbtb2	1	1	1	1	1	1	1	1	1	1	1	1
Dct	1	1	1	1	1	1	1	1	1	1	1	1
Cd300c2	1	1	1	1	1	1	1	1	1	1	1	1
Gm49542	1	1	1	1	1	1	1	1	1	1	1	1
Junos	1	1	1	1	1	1	1	1	1	1	1	1
Spc25	1	1	1	1	1	1	1	1	1	1	1	1
Copz2	1	1	1	1	1	1	1	1	1	1	1	1
Gatm	1	1	1	1	1	1	1	1	1	1	1	1
Tmem40	1	1	1	1	1	1	1	1	1	1	1	1
Gm38413	1	1	1	1	1	1	1	1	1	1	1	1
Hopx	1	1	1	1	1	1	1	1	1	1	1	1
Nostrin	1	1	1	1	1	1	1	1	1	1	1	1
Arhgap10	1	1	1	1	1	1	1	1	1	1	1	1
Tshb	1	1	1	1	1	1	1	1	1	1	1	1
Actn3	1	1	1	1	1	1	1	1	1	1	1	1
Hemk1	1	1	1	1	1	1	1	1	1	1	1	1
Fcgr1	1	1	1	1	1	1	1	1	1	1	1	1
Fbxw15	1	1	1	1	1	1	1	1	1	1	1	1
Dnajb3	1	1	1	1	1	1	1	1	1	1	1	1
Fhit	1	1	1	1	1	1	1	1	1	1	1	1
Slc50a1	1	1	1	1	1	1	1	1	1	1	1	1
Gpx3	1	1	1	1	1	1	1	1	1	1	1	1
Pimreg	1	1	1	1	1	1	1	1	1	1	1	1
Gas2	1	1	1	1	1	1	1	1	1	1	1	1
Sytl3	1	1	1	1	1	1	1	1	1	1	1	1
Nkx6-2	1	1	1	1	1	1	1	1	1	1	1	1
Syce2	1	1	1	1	1	1	1	1	1	1	1	1
Sugct	1	1	1	1	1	1	1	1	1	1	1	1
Trnp1	1	1	1	1	1	1	1	1	1	1	1	1
Gbp11	1	1	1	1	1	1	1	1	1	1	1	1
Slit1	1	1	1	1	1	1	1	1	1	1	1	1
Rsph1	1	1	1	1	1	1	1	1	1	1	1	1
Apobec1	1	1	1	1	1	1	1	1	1	1	1	1
Tph2	1	1	1	1	1	1	1	1	1	1	1	1
Trpm1	1	1	1	1	1	1	1	1	1	1	1	1
Slc14a2	1	1	1	1	1	1	1	1	1	1	1	1
B3galnt1	1	1	1	1	1	1	1	1	1	1	1	1
Spic	1	1	1	1	1	1	1	1	1	1	1	1
Pde8b	1	1	1	1	1	1	1	1	1	1	1	1
Ggact	1	1	1	1	1	1	1	1	1	1	1	1
Ifrd1	1	1	1	1	1	1	1	1	1	1	1	1
Dnmt3bos	1	1	1	1	1	1	1	1	1	1	1	1
Rbmx2	1	1	1	1	1	1	1	1	1	1	1	1
Nxph3	1	1	1	1	1	1	1	1	1	1	1	1
Sycn	1	1	1	1	1	1	1	1	1	1	1	1
Slc35f4	1	1	1	1	1	1	1	1	1	1	1	1
Aldh1a3	1	1	1	1	1	1	1	1	1	1	1	1
Cd36	1	1	1	1	1	1	1	1	1	1	1	1
Abca4	1	1	1	1	1	1	1	1	1	1	1	1
P3h2	1	1	1	1	1	1	1	1	1	1	1	1
Sval2	1	1	1	1	1	1	1	1	1	1	1	1
Ndufs2	1	1	1	1	1	1	1	1	1	1	1	1
Tpd52l1	1	1	1	1	1	1	1	1	1	1	1	1
Gsto2	1	1	1	1	1	1	1	1	1	1	1	1
Platr26	1	1	1	1	1	1	1	1	1	1	1	1
Ccl9	1	1	1	1	1	1	1	1	1	1	1	1
Dach2	1	1	1	1	1	1	1	1	1	1	1	1
Cthrc1	1	1	1	1	1	1	1	1	1	1	1	1
Gm5294	1	1	1	1	1	1	1	1	1	1	1	1
Abcg2	1	1	1	1	1	1	1	1	1	1	1	1
C1qb	1	1	1	1	1	1	1	1	1	1	1	1
Fcgr3	1	1	1	1	1	1	1	1	1	1	1	1
Clec12b	1	1	1	1	1	1	1	1	1	1	1	1
Nucb2	1	1	1	1	1	1	1	1	1	1	1	1
Mt3	1	1	1	1	1	1	1	1	1	1	1	1
Frmd5	1	1	1	1	1	1	1	1	1	1	1	1
Dlg2	1	1	1	1	1	1	1	1	1	1	1	1
Clec4a3	1	1	1	1	1	1	1	1	1	1	1	1
Slc39a11	1	1	1	1	1	1	1	1	1	1	1	1
Slc41a3	1	1	1	1	1	1	1	1	1	1	1	1
Prss16	1	1	1	1	1	1	1	1	1	1	1	1
Inka2	1	1	1	1	1	1	1	1	1	1	1	1
Hpgds	1	1	1	1	1	1	1	1	1	1	1	1
Pcsk1	1	1	1	1	1	1	1	1	1	1	1	1
Pstpip2	1	1	1	1	1	1	1	1	1	1	1	1
Tmem47	1	1	1	1	1	1	1	1	1	1	1	1
Gpc6	1	1	1	1	1	1	1	1	1	1	1	1
Tph1	1	1	1	1	1	1	1	1	1	1	1	1
Mcfd2	1	1	1	1	1	1	1	1	1	1	1	1
Gbp8	1	1	1	1	1	1	1	1	1	1	1	1
Ctnna2	1	1	1	1	1	1	1	1	1	1	1	1
Cd200	1	1	1	1	1	1	1	1	1	1	1	1
Isg20	1	1	1	1	1	1	1	1	1	1	1	1
Slc2a6	1	1	1	1	1	1	1	1	1	1	1	1
Moxd1	1	1	1	1	1	1	1	1	1	1	1	1
Slc10a6	1	1	1	1	1	1	1	1	1	1	1	1
Ms4a6d	1	1	1	1	1	1	1	1	1	1	1	1
Odc1	1	1	1	1	1	1	1	1	1	1	1	1
Gbp4	1	1	1	1	1	1	1	1	1	1	1	1
Kcnj8	1	1	1	1	1	1	1	1	1	1	1	1
Rgs4	1	1	1	1	1	1	1	1	1	1	1	1
Nefm	1	1	1	1	1	1	1	1	1	1	1	1
Rpl36al	1	1	1	1	1	1	1	1	1	1	1	1
Ccl2	1	1	1	1	1	1	1	1	1	1	1	1
Txnip	1	1	1	1	1	1	1	1	1	1	1	1
Mlkl	1	1	1	1	1	1	1	1	1	1	1	1
Dclk1	1	1	1	1	1	1	1	1	1	1	1	1
Il18bp	1	1	1	1	1	1	1	1	1	1	1	1
Mylk	1	1	1	1	1	1	1	1	1	1	1	1
Tmem273	1	1	1	1	1	1	1	1	1	1	1	1
Tbxas1	1	1	1	1	1	1	1	1	1	1	1	1
Rtkn2	1	1	1	1	1	1	1	1	1	1	1	1
Prkd1	1	1	1	1	1	1	1	1	1	1	1	1
Washc5	1	1	1	1	1	1	1	1	1	1	1	1
Igfals	1	1	1	1	1	1	1	1	1	1	1	1
Mctp1	1	1	1	1	1	1	1	1	1	1	1	1
Wdr86	1	1	1	1	1	1	1	1	1	1	1	1
Pdzrn3	1	1	1	1	1	1	1	1	1	1	1	1
Tmem132e	1	1	1	1	1	1	1	1	1	1	1	1
Grem2	1	1	1	1	1	1	1	1	1	1	1	1
Pros1	1	1	1	1	1	1	1	1	1	1	1	1
Cebpd	1	1	1	1	1	1	1	1	1	1	1	1
Cyp2j12	1	1	1	1	1	1	1	1	1	1	1	1
Nbl1	1	1	1	1	1	1	1	1	1	1	1	1
Mapk4	1	1	1	1	1	1	1	1	1	1	1	1
Jhy	1	1	1	1	1	1	1	1	1	1	1	1
Adgre1	1	1	1	1	1	1	1	1	1	1	1	1
Retnla	1	1	1	1	1	1	1	1	1	1	1	1
Mfap3l	1	1	1	1	1	1	1	1	1	1	1	1

## Sheet: Heat maps_HID
6	14923.4					227.913	12207.5
3	14923.4					99.2415	12207.5
3	3072.23					99.2415	1862.15
1.5	3072.23					39.0596	1862.15
1.5	819.47					39.0596	405.46
1	819.47					18.3457	405.46
1	0					18.3457	120.361
1	819.47					8.57812	120.361
2	819.47					8.57812	60.6901
2	0					3.71875	60.6901
2	819.47					3.71875	22.9644
1.5	819.47					1.75	22.9644
1.5	3072.23					1.75	8.35977
4.5	3072.23					1	8.35977
4.5	2315.01					1	0
3.5	2315.01					1	8.35977
3.5	1436.27					2.5	8.35977
3	1436.27					2.5	3.60191
3	0					2	3.60191
3	1436.27					2	0
4	1436.27					2	3.60191
4	0					3	3.60191
4	1436.27					3	0
3.5	1436.27					3	3.60191
3.5	2315.01					2.5	3.60191
5.5	2315.01					2.5	8.35977
5.5	1495.27					1.75	8.35977
5	1495.27					1.75	22.9644
5	0					5.6875	22.9644
5	1495.27					5.6875	13.6714
6	1495.27					4.5	13.6714
6	0					4.5	4.77243
6	1495.27					4	4.77243
5.5	1495.27					4	0
5.5	2315.01					4	4.77243
4.5	2315.01					5	4.77243
4.5	3072.23					5	0
3	3072.23					5	4.77243
3	14923.4					4.5	4.77243
9	14923.4					4.5	13.6714
9	9140.18					6.875	13.6714
7.5	9140.18					6.875	8.00597
7.5	1590.86					6	8.00597
7	1590.86					6	0
7	0					6	8.00597
7	1590.86					7.75	8.00597
8	1590.86					7.75	5.53087
8	0					7	5.53087
8	1590.86					7	0
7.5	1590.86					7	5.53087
7.5	9140.18					8.5	5.53087
10.5	9140.18					8.5	2.8084
10.5	2754.68					8	2.8084
9.5	2754.68					8	0
9.5	1044.99					8	2.8084
9	1044.99					9	2.8084
9	0					9	0
9	1044.99					9	2.8084
10	1044.99					8.5	2.8084
10	0					8.5	5.53087
10	1044.99					7.75	5.53087
9.5	1044.99					7.75	8.00597
9.5	2754.68					6.875	8.00597
11.5	2754.68					6.875	13.6714
11.5	2041.62					5.6875	13.6714
11	2041.62					5.6875	22.9644
11	0					3.71875	22.9644
11	2041.62					3.71875	60.6901
12	2041.62					13.4375	60.6901
12	0					13.4375	35.0586
12	2041.62					10.75	35.0586
11.5	2041.62					10.75	9.0252
11.5	2754.68					10	9.0252
10.5	2754.68					10	0
10.5	9140.18					10	9.0252
9	9140.18					11.5	9.0252
9	14923.4					11.5	4.32903
6	14923.4					11	4.32903
						11	0
						11	4.32903
						12	4.32903
						12	0
						12	4.32903
						11.5	4.32903
						11.5	9.0252
						10.75	9.0252
						10.75	35.0586
						16.125	35.0586
						16.125	11.3729
						14.5	11.3729
						14.5	6.07438
						13.5	6.07438
						13.5	2.22205
						13	2.22205
						13	0
						13	2.22205
						14	2.22205
						14	0
						14	2.22205
						13.5	2.22205
						13.5	6.07438
						15.5	6.07438
						15.5	3.27593
						15	3.27593
						15	0
						15	3.27593
						16	3.27593
						16	0
						16	3.27593
						15.5	3.27593
						15.5	6.07438
						14.5	6.07438
						14.5	11.3729
						17.75	11.3729
						17.75	10.6927
						17	10.6927
						17	0
						17	10.6927
						18.5	10.6927
						18.5	4.23843
						18	4.23843
						18	0
						18	4.23843
						19	4.23843
						19	0
						19	4.23843
						18.5	4.23843
						18.5	10.6927
						17.75	10.6927
						17.75	11.3729
						16.125	11.3729
						16.125	35.0586
						13.4375	35.0586
						13.4375	60.6901
						8.57812	60.6901
						8.57812	120.361
						28.1133	120.361
						28.1133	84.9315
						22.625	84.9315
						22.625	21.5816
						20.75	21.5816
						20.75	10.877
						20	10.877
						20	0
						20	10.877
						21.5	10.877
						21.5	1.9412
						21	1.9412
						21	0
						21	1.9412
						22	1.9412
						22	0
						22	1.9412
						21.5	1.9412
						21.5	10.877
						20.75	10.877
						20.75	21.5816
						24.5	21.5816
						24.5	15.6646
						23.5	15.6646
						23.5	6.80985
						23	6.80985
						23	0
						23	6.80985
						24	6.80985
						24	0
						24	6.80985
						23.5	6.80985
						23.5	15.6646
						25.5	15.6646
						25.5	7.07721
						25	7.07721
						25	0
						25	7.07721
						26	7.07721
						26	0
						26	7.07721
						25.5	7.07721
						25.5	15.6646
						24.5	15.6646
						24.5	21.5816
						22.625	21.5816
						22.625	84.9315
						33.6016	84.9315
						33.6016	55.427
						28.625	55.427
						28.625	21.5078
						27.5	21.5078
						27.5	6.2173
						27	6.2173
						27	0
						27	6.2173
						28	6.2173
						28	0
						28	6.2173
						27.5	6.2173
						27.5	21.5078
						29.75	21.5078
						29.75	16.0528
						29	16.0528
						29	0
						29	16.0528
						30.5	16.0528
						30.5	9.83305
						30	9.83305
						30	0
						30	9.83305
						31	9.83305
						31	0
						31	9.83305
						30.5	9.83305
						30.5	16.0528
						29.75	16.0528
						29.75	21.5078
						28.625	21.5078
						28.625	55.427
						38.5781	55.427
						38.5781	41.276
						34.4375	41.276
						34.4375	17.8664
						32.75	17.8664
						32.75	5.15999
						32	5.15999
						32	0
						32	5.15999
						33.5	5.15999
						33.5	2.98498
						33	2.98498
						33	0
						33	2.98498
						34	2.98498
						34	0
						34	2.98498
						33.5	2.98498
						33.5	5.15999
						32.75	5.15999
						32.75	17.8664
						36.125	17.8664
						36.125	14.6489
						35	14.6489
						35	0
						35	14.6489
						37.25	14.6489
						37.25	7.70029
						36	7.70029
						36	0
						36	7.70029
						38.5	7.70029
						38.5	5.6876
						37.5	5.6876
						37.5	2.0862
						37	2.0862
						37	0
						37	2.0862
						38	2.0862
						38	0
						38	2.0862
						37.5	2.0862
						37.5	5.6876
						39.5	5.6876
						39.5	2.64578
						39	2.64578
						39	0
						39	2.64578
						40	2.64578
						40	0
						40	2.64578
						39.5	2.64578
						39.5	5.6876
						38.5	5.6876
						38.5	7.70029
						37.25	7.70029
						37.25	14.6489
						36.125	14.6489
						36.125	17.8664
						34.4375	17.8664
						34.4375	41.276
						42.7188	41.276
						42.7188	23.9908
						41.5	23.9908
						41.5	9.90782
						41	9.90782
						41	0
						41	9.90782
						42	9.90782
						42	0
						42	9.90782
						41.5	9.90782
						41.5	23.9908
						43.9375	23.9908
						43.9375	10.0922
						43	10.0922
						43	0
						43	10.0922
						44.875	10.0922
						44.875	8.31383
						44	8.31383
						44	0
						44	8.31383
						45.75	8.31383
						45.75	6.6337
						45	6.6337
						45	0
						45	6.6337
						46.5	6.6337
						46.5	1.1587
						46	1.1587
						46	0
						46	1.1587
						47	1.1587
						47	0
						47	1.1587
						46.5	1.1587
						46.5	6.6337
						45.75	6.6337
						45.75	8.31383
						44.875	8.31383
						44.875	10.0922
						43.9375	10.0922
						43.9375	23.9908
						42.7188	23.9908
						42.7188	41.276
						38.5781	41.276
						38.5781	55.427
						33.6016	55.427
						33.6016	84.9315
						28.1133	84.9315
						28.1133	120.361
						18.3457	120.361
						18.3457	405.46
						59.7734	405.46
						59.7734	149.862
						55.0625	149.862
						55.0625	47.645
						52.375	47.645
						52.375	16.1569
						50	16.1569
						50	9.5917
						48.5	9.5917
						48.5	5.85817
						48	5.85817
						48	0
						48	5.85817
						49	5.85817
						49	0
						49	5.85817
						48.5	5.85817
						48.5	9.5917
						51.5	9.5917
						51.5	6.8173
						50.5	6.8173
						50.5	3.0352
						50	3.0352
						50	0
						50	3.0352
						51	3.0352
						51	0
						51	3.0352
						50.5	3.0352
						50.5	6.8173
						52.5	6.8173
						52.5	4.69901
						52	4.69901
						52	0
						52	4.69901
						53	4.69901
						53	0
						53	4.69901
						52.5	4.69901
						52.5	6.8173
						51.5	6.8173
						51.5	9.5917
						50	9.5917
						50	16.1569
						54.75	16.1569
						54.75	10.7343
						54	10.7343
						54	0
						54	10.7343
						55.5	10.7343
						55.5	6.7835
						55	6.7835
						55	0
						55	6.7835
						56	6.7835
						56	0
						56	6.7835
						55.5	6.7835
						55.5	10.7343
						54.75	10.7343
						54.75	16.1569
						52.375	16.1569
						52.375	47.645
						57.75	47.645
						57.75	20.5599
						57	20.5599
						57	0
						57	20.5599
						58.5	20.5599
						58.5	14.4707
						58	14.4707
						58	0
						58	14.4707
						59	14.4707
						59	0
						59	14.4707
						58.5	14.4707
						58.5	20.5599
						57.75	20.5599
						57.75	47.645
						55.0625	47.645
						55.0625	149.862
						64.4844	149.862
						64.4844	55.9795
						61.625	55.9795
						61.625	18.2459
						60.5	18.2459
						60.5	4.89752
						60	4.89752
						60	0
						60	4.89752
						61	4.89752
						61	0
						61	4.89752
						60.5	4.89752
						60.5	18.2459
						62.75	18.2459
						62.75	15.3786
						62	15.3786
						62	0
						62	15.3786
						63.5	15.3786
						63.5	4.40513
						63	4.40513
						63	0
						63	4.40513
						64	4.40513
						64	0
						64	4.40513
						63.5	4.40513
						63.5	15.3786
						62.75	15.3786
						62.75	18.2459
						61.625	18.2459
						61.625	55.9795
						67.3438	55.9795
						67.3438	23.5208
						65.75	23.5208
						65.75	7.21455
						65	7.21455
						65	0
						65	7.21455
						66.5	7.21455
						66.5	2.4113
						66	2.4113
						66	0
						66	2.4113
						67	2.4113
						67	0
						67	2.4113
						66.5	2.4113
						66.5	7.21455
						65.75	7.21455
						65.75	23.5208
						68.9375	23.5208
						68.9375	8.28143
						68	8.28143
						68	0
						68	8.28143
						69.875	8.28143
						69.875	6.00249
						69	6.00249
						69	0
						69	6.00249
						70.75	6.00249
						70.75	3.53741
						70	3.53741
						70	0
						70	3.53741
						71.5	3.53741
						71.5	2.5453
						71	2.5453
						71	0
						71	2.5453
						72	2.5453
						72	0
						72	2.5453
						71.5	2.5453
						71.5	3.53741
						70.75	3.53741
						70.75	6.00249
						69.875	6.00249
						69.875	8.28143
						68.9375	8.28143
						68.9375	23.5208
						67.3438	23.5208
						67.3438	55.9795
						64.4844	55.9795
						64.4844	149.862
						59.7734	149.862
						59.7734	405.46
						39.0596	405.46
						39.0596	1862.15
						159.423	1862.15
						159.423	1069.14
						111.771	1069.14
						111.771	464.678
						87.6328	464.678
						87.6328	146.068
						80.9531	146.068
						80.9531	39.2978
						76.0312	39.2978
						76.0312	26.9507
						73.75	26.9507
						73.75	8.08215
						73	8.08215
						73	0
						73	8.08215
						74.5	8.08215
						74.5	5.16812
						74	5.16812
						74	0
						74	5.16812
						75	5.16812
						75	0
						75	5.16812
						74.5	5.16812
						74.5	8.08215
						73.75	8.08215
						73.75	26.9507
						78.3125	26.9507
						78.3125	10.525
						76.5	10.525
						76.5	4.78915
						76	4.78915
						76	0
						76	4.78915
						77	4.78915
						77	0
						77	4.78915
						76.5	4.78915
						76.5	10.525
						80.125	10.525
						80.125	5.16304
						78.75	5.16304
						78.75	2.44473
						78	2.44473
						78	0
						78	2.44473
						79.5	2.44473
						79.5	1.82859
						79	1.82859
						79	0
						79	1.82859
						80	1.82859
						80	0
						80	1.82859
						79.5	1.82859
						79.5	2.44473
						78.75	2.44473
						78.75	5.16304
						81.5	5.16304
						81.5	5.0164
						81	5.0164
						81	0
						81	5.0164
						82	5.0164
						82	0
						82	5.0164
						81.5	5.0164
						81.5	5.16304
						80.125	5.16304
						80.125	10.525
						78.3125	10.525
						78.3125	26.9507
						76.0312	26.9507
						76.0312	39.2978
						85.875	39.2978
						85.875	29.462
						83.75	29.462
						83.75	10.3954
						83	10.3954
						83	0
						83	10.3954
						84.5	10.3954
						84.5	4.53986
						84	4.53986
						84	0
						84	4.53986
						85	4.53986
						85	0
						85	4.53986
						84.5	4.53986
						84.5	10.3954
						83.75	10.3954
						83.75	29.462
						88	29.462
						88	15.2655
						86.5	15.2655
						86.5	3.37411
						86	3.37411
						86	0
						86	3.37411
						87	3.37411
						87	0
						87	3.37411
						86.5	3.37411
						86.5	15.2655
						89.5	15.2655
						89.5	6.30602
						88.5	6.30602
						88.5	3.64548
						88	3.64548
						88	0
						88	3.64548
						89	3.64548
						89	0
						89	3.64548
						88.5	3.64548
						88.5	6.30602
						90.5	6.30602
						90.5	3.81677
						90	3.81677
						90	0
						90	3.81677
						91	3.81677
						91	0
						91	3.81677
						90.5	3.81677
						90.5	6.30602
						89.5	6.30602
						89.5	15.2655
						88	15.2655
						88	29.462
						85.875	29.462
						85.875	39.2978
						80.9531	39.2978
						80.9531	146.068
						94.3125	146.068
						94.3125	40.2191
						92.75	40.2191
						92.75	9.03477
						92	9.03477
						92	0
						92	9.03477
						93.5	9.03477
						93.5	3.76431
						93	3.76431
						93	0
						93	3.76431
						94	3.76431
						94	0
						94	3.76431
						93.5	3.76431
						93.5	9.03477
						92.75	9.03477
						92.75	40.2191
						95.875	40.2191
						95.875	19.0728
						95	19.0728
						95	0
						95	19.0728
						96.75	19.0728
						96.75	9.0151
						96	9.0151
						96	0
						96	9.0151
						97.5	9.0151
						97.5	7.8349
						97	7.8349
						97	0
						97	7.8349
						98	7.8349
						98	0
						98	7.8349
						97.5	7.8349
						97.5	9.0151
						96.75	9.0151
						96.75	19.0728
						95.875	19.0728
						95.875	40.2191
						94.3125	40.2191
						94.3125	146.068
						87.6328	146.068
						87.6328	464.678
						135.91	464.678
						135.91	245.698
						118.93	245.698
						118.93	163.287
						106.781	163.287
						106.781	72.5283
						101.5	72.5283
						101.5	22.7866
						99.75	22.7866
						99.75	8.01578
						99	8.01578
						99	0
						99	8.01578
						100.5	8.01578
						100.5	1.96748
						100	1.96748
						100	0
						100	1.96748
						101	1.96748
						101	0
						101	1.96748
						100.5	1.96748
						100.5	8.01578
						99.75	8.01578
						99.75	22.7866
						103.25	22.7866
						103.25	13.1881
						102	13.1881
						102	0
						102	13.1881
						104.5	13.1881
						104.5	8.1577
						103.5	8.1577
						103.5	3.7478
						103	3.7478
						103	0
						103	3.7478
						104	3.7478
						104	0
						104	3.7478
						103.5	3.7478
						103.5	8.1577
						105.5	8.1577
						105.5	4.08849
						105	4.08849
						105	0
						105	4.08849
						106	4.08849
						106	0
						106	4.08849
						105.5	4.08849
						105.5	8.1577
						104.5	8.1577
						104.5	13.1881
						103.25	13.1881
						103.25	22.7866
						101.5	22.7866
						101.5	72.5283
						112.062	72.5283
						112.062	53.4963
						109.25	53.4963
						109.25	18.3181
						107.75	18.3181
						107.75	5.19718
						107	5.19718
						107	0
						107	5.19718
						108.5	5.19718
						108.5	1.63428
						108	1.63428
						108	0
						108	1.63428
						109	1.63428
						109	0
						109	1.63428
						108.5	1.63428
						108.5	5.19718
						107.75	5.19718
						107.75	18.3181
						110.75	18.3181
						110.75	10.5317
						110	10.5317
						110	0
						110	10.5317
						111.5	10.5317
						111.5	5.51521
						111	5.51521
						111	0
						111	5.51521
						112	5.51521
						112	0
						112	5.51521
						111.5	5.51521
						111.5	10.5317
						110.75	10.5317
						110.75	18.3181
						109.25	18.3181
						109.25	53.4963
						114.875	53.4963
						114.875	33.9811
						113.5	33.9811
						113.5	2.60904
						113	2.60904
						113	0
						113	2.60904
						114	2.60904
						114	0
						114	2.60904
						113.5	2.60904
						113.5	33.9811
						116.25	33.9811
						116.25	22.4006
						115	22.4006
						115	0
						115	22.4006
						117.5	22.4006
						117.5	8.14081
						116.5	8.14081
						116.5	3.02688
						116	3.02688
						116	0
						116	3.02688
						117	3.02688
						117	0
						117	3.02688
						116.5	3.02688
						116.5	8.14081
						118.5	8.14081
						118.5	5.37366
						118	5.37366
						118	0
						118	5.37366
						119	5.37366
						119	0
						119	5.37366
						118.5	5.37366
						118.5	8.14081
						117.5	8.14081
						117.5	22.4006
						116.25	22.4006
						116.25	33.9811
						114.875	33.9811
						114.875	53.4963
						112.062	53.4963
						112.062	72.5283
						106.781	72.5283
						106.781	163.287
						131.078	163.287
						131.078	130.577
						124.344	130.577
						124.344	35.9427
						121.625	35.9427
						121.625	15.5729
						120.5	15.5729
						120.5	5.82897
						120	5.82897
						120	0
						120	5.82897
						121	5.82897
						121	0
						121	5.82897
						120.5	5.82897
						120.5	15.5729
						122.75	15.5729
						122.75	10.5682
						122	10.5682
						122	0
						122	10.5682
						123.5	10.5682
						123.5	4.80684
						123	4.80684
						123	0
						123	4.80684
						124	4.80684
						124	0
						124	4.80684
						123.5	4.80684
						123.5	10.5682
						122.75	10.5682
						122.75	15.5729
						121.625	15.5729
						121.625	35.9427
						127.062	35.9427
						127.062	22.9078
						125.5	22.9078
						125.5	5.32058
						125	5.32058
						125	0
						125	5.32058
						126	5.32058
						126	0
						126	5.32058
						125.5	5.32058
						125.5	22.9078
						128.625	22.9078
						128.625	15.0492
						127.5	15.0492
						127.5	7.48903
						127	7.48903
						127	0
						127	7.48903
						128	7.48903
						128	0
						128	7.48903
						127.5	7.48903
						127.5	15.0492
						129.75	15.0492
						129.75	8.27413
						129	8.27413
						129	0
						129	8.27413
						130.5	8.27413
						130.5	3.21968
						130	3.21968
						130	0
						130	3.21968
						131	3.21968
						131	0
						131	3.21968
						130.5	3.21968
						130.5	8.27413
						129.75	8.27413
						129.75	15.0492
						128.625	15.0492
						128.625	22.9078
						127.062	22.9078
						127.062	35.9427
						124.344	35.9427
						124.344	130.577
						137.812	130.577
						137.812	77.0431
						134.625	77.0431
						134.625	30.4645
						132.75	30.4645
						132.75	10.688
						132	10.688
						132	0
						132	10.688
						133.5	10.688
						133.5	2.8584
						133	2.8584
						133	0
						133	2.8584
						134	2.8584
						134	0
						134	2.8584
						133.5	2.8584
						133.5	10.688
						132.75	10.688
						132.75	30.4645
						136.5	30.4645
						136.5	13.6198
						135.5	13.6198
						135.5	3.4243
						135	3.4243
						135	0
						135	3.4243
						136	3.4243
						136	0
						136	3.4243
						135.5	3.4243
						135.5	13.6198
						137.5	13.6198
						137.5	9.00379
						137	9.00379
						137	0
						137	9.00379
						138	9.00379
						138	0
						138	9.00379
						137.5	9.00379
						137.5	13.6198
						136.5	13.6198
						136.5	30.4645
						134.625	30.4645
						134.625	77.0431
						141	77.0431
						141	32.1222
						139.5	32.1222
						139.5	12.6637
						139	12.6637
						139	0
						139	12.6637
						140	12.6637
						140	0
						140	12.6637
						139.5	12.6637
						139.5	32.1222
						142.5	32.1222
						142.5	14.4082
						141.5	14.4082
						141.5	2.78034
						141	2.78034
						141	0
						141	2.78034
						142	2.78034
						142	0
						142	2.78034
						141.5	2.78034
						141.5	14.4082
						143.5	14.4082
						143.5	7.44689
						143	7.44689
						143	0
						143	7.44689
						144	7.44689
						144	0
						144	7.44689
						143.5	7.44689
						143.5	14.4082
						142.5	14.4082
						142.5	32.1222
						141	32.1222
						141	77.0431
						137.812	77.0431
						137.812	130.577
						131.078	130.577
						131.078	163.287
						118.93	163.287
						118.93	245.698
						152.891	245.698
						152.891	181.166
						147.625	181.166
						147.625	30.6564
						145.75	30.6564
						145.75	12.6767
						145	12.6767
						145	0
						145	12.6767
						146.5	12.6767
						146.5	3.75576
						146	3.75576
						146	0
						146	3.75576
						147	3.75576
						147	0
						147	3.75576
						146.5	3.75576
						146.5	12.6767
						145.75	12.6767
						145.75	30.6564
						149.5	30.6564
						149.5	13.911
						148.5	13.911
						148.5	3.7173
						148	3.7173
						148	0
						148	3.7173
						149	3.7173
						149	0
						149	3.7173
						148.5	3.7173
						148.5	13.911
						150.5	13.911
						150.5	8.26944
						150	8.26944
						150	0
						150	8.26944
						151	8.26944
						151	0
						151	8.26944
						150.5	8.26944
						150.5	13.911
						149.5	13.911
						149.5	30.6564
						147.625	30.6564
						147.625	181.166
						158.156	181.166
						158.156	67.7999
						152.875	67.7999
						152.875	13.5516
						152	13.5516
						152	0
						152	13.5516
						153.75	13.5516
						153.75	7.07942
						153	7.07942
						153	0
						153	7.07942
						154.5	7.07942
						154.5	4.23886
						154	4.23886
						154	0
						154	4.23886
						155	4.23886
						155	0
						155	4.23886
						154.5	4.23886
						154.5	7.07942
						153.75	7.07942
						153.75	13.5516
						152.875	13.5516
						152.875	67.7999
						163.438	67.7999
						163.438	59.632
						159.5	59.632
						159.5	20.7549
						157.5	20.7549
						157.5	9.61298
						156.5	9.61298
						156.5	1.36458
						156	1.36458
						156	0
						156	1.36458
						157	1.36458
						157	0
						157	1.36458
						156.5	1.36458
						156.5	9.61298
						158.5	9.61298
						158.5	1.92726
						158	1.92726
						158	0
						158	1.92726
						159	1.92726
						159	0
						159	1.92726
						158.5	1.92726
						158.5	9.61298
						157.5	9.61298
						157.5	20.7549
						161.5	20.7549
						161.5	9.85766
						160.5	9.85766
						160.5	4.28423
						160	4.28423
						160	0
						160	4.28423
						161	4.28423
						161	0
						161	4.28423
						160.5	4.28423
						160.5	9.85766
						162.5	9.85766
						162.5	4.60074
						162	4.60074
						162	0
						162	4.60074
						163	4.60074
						163	0
						163	4.60074
						162.5	4.60074
						162.5	9.85766
						161.5	9.85766
						161.5	20.7549
						159.5	20.7549
						159.5	59.632
						167.375	59.632
						167.375	29.6225
						165.5	29.6225
						165.5	12.0946
						164.5	12.0946
						164.5	6.40331
						164	6.40331
						164	0
						164	6.40331
						165	6.40331
						165	0
						165	6.40331
						164.5	6.40331
						164.5	12.0946
						166.5	12.0946
						166.5	6.65896
						166	6.65896
						166	0
						166	6.65896
						167	6.65896
						167	0
						167	6.65896
						166.5	6.65896
						166.5	12.0946
						165.5	12.0946
						165.5	29.6225
						169.25	29.6225
						169.25	15.1624
						168	15.1624
						168	0
						168	15.1624
						170.5	15.1624
						170.5	8.64294
						169.5	8.64294
						169.5	1.93042
						169	1.93042
						169	0
						169	1.93042
						170	1.93042
						170	0
						170	1.93042
						169.5	1.93042
						169.5	8.64294
						171.5	8.64294
						171.5	3.89289
						171	3.89289
						171	0
						171	3.89289
						172	3.89289
						172	0
						172	3.89289
						171.5	3.89289
						171.5	8.64294
						170.5	8.64294
						170.5	15.1624
						169.25	15.1624
						169.25	29.6225
						167.375	29.6225
						167.375	59.632
						163.438	59.632
						163.438	67.7999
						158.156	67.7999
						158.156	181.166
						152.891	181.166
						152.891	245.698
						135.91	245.698
						135.91	464.678
						111.771	464.678
						111.771	1069.14
						207.075	1069.14
						207.075	647.074
						187.844	647.074
						187.844	243.58
						178.344	243.58
						178.344	43.2029
						174.688	43.2029
						174.688	19.7468
						173.5	19.7468
						173.5	5.1219
						173	5.1219
						173	0
						173	5.1219
						174	5.1219
						174	0
						174	5.1219
						173.5	5.1219
						173.5	19.7468
						175.875	19.7468
						175.875	12.2815
						175	12.2815
						175	0
						175	12.2815
						176.75	12.2815
						176.75	8.1399
						176	8.1399
						176	0
						176	8.1399
						177.5	8.1399
						177.5	4.85376
						177	4.85376
						177	0
						177	4.85376
						178	4.85376
						178	0
						178	4.85376
						177.5	4.85376
						177.5	8.1399
						176.75	8.1399
						176.75	12.2815
						175.875	12.2815
						175.875	19.7468
						174.688	19.7468
						174.688	43.2029
						182	43.2029
						182	34.4613
						179.75	34.4613
						179.75	14.3251
						179	14.3251
						179	0
						179	14.3251
						180.5	14.3251
						180.5	4.94107
						180	4.94107
						180	0
						180	4.94107
						181	4.94107
						181	0
						181	4.94107
						180.5	4.94107
						180.5	14.3251
						179.75	14.3251
						179.75	34.4613
						184.25	34.4613
						184.25	23.088
						182	23.088
						182	0
						182	23.088
						186.5	23.088
						186.5	18.0598
						184.5	18.0598
						184.5	7.14502
						183.5	7.14502
						183.5	2.68476
						183	2.68476
						183	0
						183	2.68476
						184	2.68476
						184	0
						184	2.68476
						183.5	2.68476
						183.5	7.14502
						185.5	7.14502
						185.5	5.66546
						185	5.66546
						185	0
						185	5.66546
						186	5.66546
						186	0
						186	5.66546
						185.5	5.66546
						185.5	7.14502
						184.5	7.14502
						184.5	18.0598
						188.5	18.0598
						188.5	10.303
						187.5	10.303
						187.5	2.59318
						187	2.59318
						187	0
						187	2.59318
						188	2.59318
						188	0
						188	2.59318
						187.5	2.59318
						187.5	10.303
						189.5	10.303
						189.5	4.95064
						189	4.95064
						189	0
						189	4.95064
						190	4.95064
						190	0
						190	4.95064
						189.5	4.95064
						189.5	10.303
						188.5	10.303
						188.5	18.0598
						186.5	18.0598
						186.5	23.088
						184.25	23.088
						184.25	34.4613
						182	34.4613
						182	43.2029
						178.344	43.2029
						178.344	243.58
						197.344	243.58
						197.344	142.877
						191.938	142.877
						191.938	24.4725
						191	24.4725
						191	0
						191	24.4725
						192.875	24.4725
						192.875	12.8972
						192	12.8972
						192	0
						192	12.8972
						193.75	12.8972
						193.75	9.14523
						193	9.14523
						193	0
						193	9.14523
						194.5	9.14523
						194.5	2.57213
						194	2.57213
						194	0
						194	2.57213
						195	2.57213
						195	0
						195	2.57213
						194.5	2.57213
						194.5	9.14523
						193.75	9.14523
						193.75	12.8972
						192.875	12.8972
						192.875	24.4725
						191.938	24.4725
						191.938	142.877
						202.75	142.877
						202.75	44.1992
						198.875	44.1992
						198.875	22.9245
						196.875	22.9245
						196.875	3.77088
						196	3.77088
						196	0
						196	3.77088
						197.75	3.77088
						197.75	3.10418
						197	3.10418
						197	0
						197	3.10418
						198.5	3.10418
						198.5	1.94079
						198	1.94079
						198	0
						198	1.94079
						199	1.94079
						199	0
						199	1.94079
						198.5	1.94079
						198.5	3.10418
						197.75	3.10418
						197.75	3.77088
						196.875	3.77088
						196.875	22.9245
						200.875	22.9245
						200.875	18.3089
						200	18.3089
						200	0
						200	18.3089
						201.75	18.3089
						201.75	14.199
						201	14.199
						201	0
						201	14.199
						202.5	14.199
						202.5	7.07868
						202	7.07868
						202	0
						202	7.07868
						203	7.07868
						203	0
						203	7.07868
						202.5	7.07868
						202.5	14.199
						201.75	14.199
						201.75	18.3089
						200.875	18.3089
						200.875	22.9245
						198.875	22.9245
						198.875	44.1992
						206.625	44.1992
						206.625	28.9559
						204.75	28.9559
						204.75	9.17007
						204	9.17007
						204	0
						204	9.17007
						205.5	9.17007
						205.5	7.77233
						205	7.77233
						205	0
						205	7.77233
						206	7.77233
						206	0
						206	7.77233
						205.5	7.77233
						205.5	9.17007
						204.75	9.17007
						204.75	28.9559
						208.5	28.9559
						208.5	10.7435
						207.5	10.7435
						207.5	4.14326
						207	4.14326
						207	0
						207	4.14326
						208	4.14326
						208	0
						208	4.14326
						207.5	4.14326
						207.5	10.7435
						209.5	10.7435
						209.5	7.51379
						209	7.51379
						209	0
						209	7.51379
						210	7.51379
						210	0
						210	7.51379
						209.5	7.51379
						209.5	10.7435
						208.5	10.7435
						208.5	28.9559
						206.625	28.9559
						206.625	44.1992
						202.75	44.1992
						202.75	142.877
						197.344	142.877
						197.344	243.58
						187.844	243.58
						187.844	647.074
						226.307	647.074
						226.307	345.347
						215.562	345.347
						215.562	64.2205
						212.5	64.2205
						212.5	7.41322
						211.5	7.41322
						211.5	2.59367
						211	2.59367
						211	0
						211	2.59367
						212	2.59367
						212	0
						212	2.59367
						211.5	2.59367
						211.5	7.41322
						213.5	7.41322
						213.5	4.98422
						213	4.98422
						213	0
						213	4.98422
						214	4.98422
						214	0
						214	4.98422
						213.5	4.98422
						213.5	7.41322
						212.5	7.41322
						212.5	64.2205
						218.625	64.2205
						218.625	38.2749
						215.75	38.2749
						215.75	15.2982
						215	15.2982
						215	0
						215	15.2982
						216.5	15.2982
						216.5	2.72343
						216	2.72343
						216	0
						216	2.72343
						217	2.72343
						217	0
						217	2.72343
						216.5	2.72343
						216.5	15.2982
						215.75	15.2982
						215.75	38.2749
						221.5	38.2749
						221.5	29.3105
						219.5	29.3105
						219.5	8.19964
						218.5	8.19964
						218.5	2.08069
						218	2.08069
						218	0
						218	2.08069
						219	2.08069
						219	0
						219	2.08069
						218.5	2.08069
						218.5	8.19964
						220.5	8.19964
						220.5	3.4061
						220	3.4061
						220	0
						220	3.4061
						221	3.4061
						221	0
						221	3.4061
						220.5	3.4061
						220.5	8.19964
						219.5	8.19964
						219.5	29.3105
						223.5	29.3105
						223.5	11.7895
						222.5	11.7895
						222.5	4.02107
						222	4.02107
						222	0
						222	4.02107
						223	4.02107
						223	0
						223	4.02107
						222.5	4.02107
						222.5	11.7895
						224.5	11.7895
						224.5	7.22835
						224	7.22835
						224	0
						224	7.22835
						225	7.22835
						225	0
						225	7.22835
						224.5	7.22835
						224.5	11.7895
						223.5	11.7895
						223.5	29.3105
						221.5	29.3105
						221.5	38.2749
						218.625	38.2749
						218.625	64.2205
						215.562	64.2205
						215.562	345.347
						237.051	345.347
						237.051	122.065
						230.531	122.065
						230.531	49.0137
						227.5	49.0137
						227.5	10.9686
						226.5	10.9686
						226.5	5.75809
						226	5.75809
						226	0
						226	5.75809
						227	5.75809
						227	0
						227	5.75809
						226.5	5.75809
						226.5	10.9686
						228.5	10.9686
						228.5	8.73707
						228	8.73707
						228	0
						228	8.73707
						229	8.73707
						229	0
						229	8.73707
						228.5	8.73707
						228.5	10.9686
						227.5	10.9686
						227.5	49.0137
						233.562	49.0137
						233.562	24.7667
						231.625	24.7667
						231.625	6.07277
						230.5	6.07277
						230.5	1.68803
						230	1.68803
						230	0
						230	1.68803
						231	1.68803
						231	0
						231	1.68803
						230.5	1.68803
						230.5	6.07277
						232.75	6.07277
						232.75	5.33812
						232	5.33812
						232	0
						232	5.33812
						233.5	5.33812
						233.5	3.88568
						233	3.88568
						233	0
						233	3.88568
						234	3.88568
						234	0
						234	3.88568
						233.5	3.88568
						233.5	5.33812
						232.75	5.33812
						232.75	6.07277
						231.625	6.07277
						231.625	24.7667
						235.5	24.7667
						235.5	11.7719
						235	11.7719
						235	0
						235	11.7719
						236	11.7719
						236	0
						236	11.7719
						235.5	11.7719
						235.5	24.7667
						233.562	24.7667
						233.562	49.0137
						230.531	49.0137
						230.531	122.065
						243.57	122.065
						243.57	60.6224
						239.25	60.6224
						239.25	26.7683
						237.75	26.7683
						237.75	4.00771
						237	4.00771
						237	0
						237	4.00771
						238.5	4.00771
						238.5	2.16683
						238	2.16683
						238	0
						238	2.16683
						239	2.16683
						239	0
						239	2.16683
						238.5	2.16683
						238.5	4.00771
						237.75	4.00771
						237.75	26.7683
						240.75	26.7683
						240.75	7.07849
						240	7.07849
						240	0
						240	7.07849
						241.5	7.07849
						241.5	3.78481
						241	3.78481
						241	0
						241	3.78481
						242	3.78481
						242	0
						242	3.78481
						241.5	3.78481
						241.5	7.07849
						240.75	7.07849
						240.75	26.7683
						239.25	26.7683
						239.25	60.6224
						247.891	60.6224
						247.891	42.9127
						245	42.9127
						245	12.5302
						243.5	12.5302
						243.5	1.54907
						243	1.54907
						243	0
						243	1.54907
						244	1.54907
						244	0
						244	1.54907
						243.5	1.54907
						243.5	12.5302
						246.5	12.5302
						246.5	8.01815
						245.5	8.01815
						245.5	2.3941
						245	2.3941
						245	0
						245	2.3941
						246	2.3941
						246	0
						246	2.3941
						245.5	2.3941
						245.5	8.01815
						247.5	8.01815
						247.5	4.00538
						247	4.00538
						247	0
						247	4.00538
						248	4.00538
						248	0
						248	4.00538
						247.5	4.00538
						247.5	8.01815
						246.5	8.01815
						246.5	12.5302
						245	12.5302
						245	42.9127
						250.781	42.9127
						250.781	34.151
						249	34.151
						249	0
						249	34.151
						252.562	34.151
						252.562	18.3717
						250.5	18.3717
						250.5	5.00144
						250	5.00144
						250	0
						250	5.00144
						251	5.00144
						251	0
						251	5.00144
						250.5	5.00144
						250.5	18.3717
						254.625	18.3717
						254.625	12.5437
						252.75	12.5437
						252.75	6.46662
						252	6.46662
						252	0
						252	6.46662
						253.5	6.46662
						253.5	4.277
						253	4.277
						253	0
						253	4.277
						254	4.277
						254	0
						254	4.277
						253.5	4.277
						253.5	6.46662
						252.75	6.46662
						252.75	12.5437
						256.5	12.5437
						256.5	10.9842
						255.5	10.9842
						255.5	2.62061
						255	2.62061
						255	0
						255	2.62061
						256	2.62061
						256	0
						256	2.62061
						255.5	2.62061
						255.5	10.9842
						257.5	10.9842
						257.5	6.71087
						257	6.71087
						257	0
						257	6.71087
						258	6.71087
						258	0
						258	6.71087
						257.5	6.71087
						257.5	10.9842
						256.5	10.9842
						256.5	12.5437
						254.625	12.5437
						254.625	18.3717
						252.562	18.3717
						252.562	34.151
						250.781	34.151
						250.781	42.9127
						247.891	42.9127
						247.891	60.6224
						243.57	60.6224
						243.57	122.065
						237.051	122.065
						237.051	345.347
						226.307	345.347
						226.307	647.074
						207.075	647.074
						207.075	1069.14
						159.423	1069.14
						159.423	1862.15
						99.2415	1862.15
						99.2415	12207.5
						356.585	12207.5
						356.585	2811.58
						295.557	2811.58
						295.557	578.808
						274.078	578.808
						274.078	148.867
						267.25	148.867
						267.25	35.4836
						262.875	35.4836
						262.875	19.9617
						260.5	19.9617
						260.5	7.05556
						259.5	7.05556
						259.5	2.34387
						259	2.34387
						259	0
						259	2.34387
						260	2.34387
						260	0
						260	2.34387
						259.5	2.34387
						259.5	7.05556
						261.5	7.05556
						261.5	5.29283
						261	5.29283
						261	0
						261	5.29283
						262	5.29283
						262	0
						262	5.29283
						261.5	5.29283
						261.5	7.05556
						260.5	7.05556
						260.5	19.9617
						265.25	19.9617
						265.25	7.9128
						263.75	7.9128
						263.75	3.43115
						263	3.43115
						263	0
						263	3.43115
						264.5	3.43115
						264.5	1.88405
						264	1.88405
						264	0
						264	1.88405
						265	1.88405
						265	0
						265	1.88405
						264.5	1.88405
						264.5	3.43115
						263.75	3.43115
						263.75	7.9128
						266.75	7.9128
						266.75	4.71263
						266	4.71263
						266	0
						266	4.71263
						267.5	4.71263
						267.5	1.48756
						267	1.48756
						267	0
						267	1.48756
						268	1.48756
						268	0
						268	1.48756
						267.5	1.48756
						267.5	4.71263
						266.75	4.71263
						266.75	7.9128
						265.25	7.9128
						265.25	19.9617
						262.875	19.9617
						262.875	35.4836
						271.625	35.4836
						271.625	22.2165
						269.75	22.2165
						269.75	8.19406
						269	8.19406
						269	0
						269	8.19406
						270.5	8.19406
						270.5	3.02873
						270	3.02873
						270	0
						270	3.02873
						271	3.02873
						271	0
						271	3.02873
						270.5	3.02873
						270.5	8.19406
						269.75	8.19406
						269.75	22.2165
						273.5	22.2165
						273.5	8.65657
						272.5	8.65657
						272.5	5.02084
						272	5.02084
						272	0
						272	5.02084
						273	5.02084
						273	0
						273	5.02084
						272.5	5.02084
						272.5	8.65657
						274.5	8.65657
						274.5	5.0553
						274	5.0553
						274	0
						274	5.0553
						275	5.0553
						275	0
						275	5.0553
						274.5	5.0553
						274.5	8.65657
						273.5	8.65657
						273.5	22.2165
						271.625	22.2165
						271.625	35.4836
						267.25	35.4836
						267.25	148.867
						280.906	148.867
						280.906	55.8997
						277.625	55.8997
						277.625	23.2055
						276.5	23.2055
						276.5	5.18917
						276	5.18917
						276	0
						276	5.18917
						277	5.18917
						277	0
						277	5.18917
						276.5	5.18917
						276.5	23.2055
						278.75	23.2055
						278.75	11.9619
						278	11.9619
						278	0
						278	11.9619
						279.5	11.9619
						279.5	2.89866
						279	2.89866
						279	0
						279	2.89866
						280	2.89866
						280	0
						280	2.89866
						279.5	2.89866
						279.5	11.9619
						278.75	11.9619
						278.75	23.2055
						277.625	23.2055
						277.625	55.8997
						284.188	55.8997
						284.188	30.5557
						282.5	30.5557
						282.5	14.7592
						281.5	14.7592
						281.5	3.23149
						281	3.23149
						281	0
						281	3.23149
						282	3.23149
						282	0
						282	3.23149
						281.5	3.23149
						281.5	14.7592
						283.5	14.7592
						283.5	10.6236
						283	10.6236
						283	0
						283	10.6236
						284	10.6236
						284	0
						284	10.6236
						283.5	10.6236
						283.5	14.7592
						282.5	14.7592
						282.5	30.5557
						285.875	30.5557
						285.875	19.1833
						285	19.1833
						285	0
						285	19.1833
						286.75	19.1833
						286.75	9.58741
						286	9.58741
						286	0
						286	9.58741
						287.5	9.58741
						287.5	2.46151
						287	2.46151
						287	0
						287	2.46151
						288	2.46151
						288	0
[truncated: 1,494 more rows]

## Sheet: Heat maps_HID1
	S3891	S3895	S3931	combine1	S3918	S3892	S3906	combine3	S3927	S3947	combine2	S3919
Pappa2	1	1	1	1	1	1	1	1	1	1	1	1
Rprml	1	1	1	1	1	1	1	1	1	1	1	1
Tmem144	1	1	1	1	1	1	1	1	1	1	1	1
Aard	1	1	1	1	1	1	1	1	1	1	1	1
Tspoap1	1	1	1	1	1	1	1	1	1	1	1	1
Aldoa	1	1	1	1	1	1	1	1	1	1	1	1
Card19	1	1	1	1	1	1	1	1	1	1	1	1
Serpina10	1	1	1	1	1	1	1	1	1	1	1	1
Kcnip4	1	1	1	1	1	1	1	1	1	1	1	1
Gm16702	1	1	1	1	1	1	1	1	1	1	1	1
Nt5dc2	1	1	1	1	1	1	1	1	1	1	1	1
Clip4	1	1	1	1	1	1	1	1	1	1	1	1
Ttll11	1	1	1	1	1	1	1	1	1	1	1	1
Depdc7	1	1	1	1	1	1	1	1	1	1	1	1
Sez6l	1	1	1	1	1	1	1	1	1	1	1	1
Ky	1	1	1	1	1	1	1	1	1	1	1	1
Kif19a	1	1	1	1	1	1	1	1	1	1	1	1
Greb1l	1	1	1	1	1	1	1	1	1	1	1	1
Tmem179	1	1	1	1	1	1	1	1	1	1	1	1
Kcnn2	1	1	1	1	1	1	1	1	1	1	1	1
Zfp454	1	1	1	1	1	1	1	1	1	1	1	1
Pex5l	1	1	1	1	1	1	1	1	1	1	1	1
Ppp4r4	1	1	1	1	1	1	1	1	1	1	1	1
Tmem229b	1	1	1	1	1	1	1	1	1	1	1	1
Rnf141	1	1	1	1	1	1	1	1	1	1	1	1
C1galt1	1	1	1	1	1	1	1	1	1	1	1	1
Aqp11	1	1	1	1	1	1	1	1	1	1	1	1
Cnot7	1	1	1	1	1	1	1	1	1	1	1	1
Insm1	1	1	1	1	1	1	1	1	1	1	1	1
Fbxw4	1	1	1	1	1	1	1	1	1	1	1	1
Dact3	1	1	1	1	1	1	1	1	1	1	1	1
Sgpp2	1	1	1	1	1	1	1	1	1	1	1	1
Hdac6	1	1	1	1	1	1	1	1	1	1	1	1
Ache	1	1	1	1	1	1	1	1	1	1	1	1
Cbs	1	1	1	1	1	1	1	1	1	1	1	1
Clstn3	1	1	1	1	1	1	1	1	1	1	1	1
Pde1c	1	1	1	1	1	1	1	1	1	1	1	1
Pepd	1	1	1	1	1	1	1	1	1	1	1	1
Ythdc2	1	1	1	1	1	1	1	1	1	1	1	1
Apc2	1	1	1	1	1	1	1	1	1	1	1	1
Kcnn1	1	1	1	1	1	1	1	1	1	1	1	1
Cdhr1	1	1	1	1	1	1	1	1	1	1	1	1
Fgf9	1	1	1	1	1	1	1	1	1	1	1	1
Cyb5rl	1	1	1	1	1	1	1	1	1	1	1	1
Podxl2	1	1	1	1	1	1	1	1	1	1	1	1
Kcnh2	1	1	1	1	1	1	1	1	1	1	1	1
Barhl1	1	1	1	1	1	1	1	1	1	1	1	1
Ulk4	1	1	1	1	1	1	1	1	1	1	1	1
Neurl1b	1	1	1	1	1	1	1	1	1	1	1	1
Zfp354b	1	1	1	1	1	1	1	1	1	1	1	1
Rwdd3	1	1	1	1	1	1	1	1	1	1	1	1
Mrln	1	1	1	1	1	1	1	1	1	1	1	1
Enho	1	1	1	1	1	1	1	1	1	1	1	1
Rad51ap2	1	1	1	1	1	1	1	1	1	1	1	1
Mir186	1	1	1	1	1	1	1	1	1	1	1	1
Camkk1	1	1	1	1	1	1	1	1	1	1	1	1
Atp2b2	1	1	1	1	1	1	1	1	1	1	1	1
Otoa	1	1	1	1	1	1	1	1	1	1	1	1
Prelid1	1	1	1	1	1	1	1	1	1	1	1	1
Tbc1d4	1	1	1	1	1	1	1	1	1	1	1	1
Rab40c	1	1	1	1	1	1	1	1	1	1	1	1
Pms1	1	1	1	1	1	1	1	1	1	1	1	1
Ppp3ca	1	1	1	1	1	1	1	1	1	1	1	1
Hps1	1	1	1	1	1	1	1	1	1	1	1	1
Trmt1	1	1	1	1	1	1	1	1	1	1	1	1
Mks1	1	1	1	1	1	1	1	1	1	1	1	1
Agbl5	1	1	1	1	1	1	1	1	1	1	1	1
Cnot9	1	1	1	1	1	1	1	1	1	1	1	1
Cfl1	1	1	1	1	1	1	1	1	1	1	1	1
Trp53	1	1	1	1	1	1	1	1	1	1	1	1
Fmnl3	1	1	1	1	1	1	1	1	1	1	1	1
Bcl11b	1	1	1	1	1	1	1	1	1	1	1	1
Hnrnpa0	1	1	1	1	1	1	1	1	1	1	1	1
Aldoc	1	1	1	1	1	1	1	1	1	1	1	1
Zfpm1	1	1	1	1	1	1	1	1	1	1	1	1
Tead3	1	1	1	1	1	1	1	1	1	1	1	1
Slc2a3	1	1	1	1	1	1	1	1	1	1	1	1
Wdr46	1	1	1	1	1	1	1	1	1	1	1	1
Hivep3	1	1	1	1	1	1	1	1	1	1	1	1
Lpl	1	1	1	1	1	1	1	1	1	1	1	1
Zfp994	1	1	1	1	1	1	1	1	1	1	1	1
Cda	1	1	1	1	1	1	1	1	1	1	1	1
Tspan9	1	1	1	1	1	1	1	1	1	1	1	1
Zfx	1	1	1	1	1	1	1	1	1	1	1	1
Adcy5	1	1	1	1	1	1	1	1	1	1	1	1
Usp53	1	1	1	1	1	1	1	1	1	1	1	1
Kap	1	1	1	1	1	1	1	1	1	1	1	1
Zfp426	1	1	1	1	1	1	1	1	1	1	1	1
Krr1	1	1	1	1	1	1	1	1	1	1	1	1
Zfp212	1	1	1	1	1	1	1	1	1	1	1	1
Lrrc1	1	1	1	1	1	1	1	1	1	1	1	1
Kcnk3	1	1	1	1	1	1	1	1	1	1	1	1
Dbpht2	1	1	1	1	1	1	1	1	1	1	1	1
Med1	1	1	1	1	1	1	1	1	1	1	1	1
Tuft1	1	1	1	1	1	1	1	1	1	1	1	1
Letmd1	1	1	1	1	1	1	1	1	1	1	1	1
Usp21	1	1	1	1	1	1	1	1	1	1	1	1
Szrd1	1	1	1	1	1	1	1	1	1	1	1	1
Dbp	1	1	1	1	1	1	1	1	1	1	1	1
1500015A07Rik	1	1	1	1	1	1	1	1	1	1	1	1
Irx1	1	1	1	1	1	1	1	1	1	1	1	1
Prox1os	1	1	1	1	1	1	1	1	1	1	1	1
Zfp821	1	1	1	1	1	1	1	1	1	1	1	1
Slc25a17	1	1	1	1	1	1	1	1	1	1	1	1
Kcnip3	1	1	1	1	1	1	1	1	1	1	1	1
Rab38	1	1	1	1	1	1	1	1	1	1	1	1
Sgce	1	1	1	1	1	1	1	1	1	1	1	1
Gls2	1	1	1	1	1	1	1	1	1	1	1	1
Paqr9	1	1	1	1	1	1	1	1	1	1	1	1
Gnai1	1	1	1	1	1	1	1	1	1	1	1	1
Slc1a2	1	1	1	1	1	1	1	1	1	1	1	1
Pax6	1	1	1	1	1	1	1	1	1	1	1	1
Lrrc61	1	1	1	1	1	1	1	1	1	1	1	1
Ube2l3	1	1	1	1	1	1	1	1	1	1	1	1
Naa35	1	1	1	1	1	1	1	1	1	1	1	1
Arx	1	1	1	1	1	1	1	1	1	1	1	1
Mcoln3	1	1	1	1	1	1	1	1	1	1	1	1
Ube2r2	1	1	1	1	1	1	1	1	1	1	1	1
Ffar4	1	1	1	1	1	1	1	1	1	1	1	1
Rnf114	1	1	1	1	1	1	1	1	1	1	1	1
Sf3a2	1	1	1	1	1	1	1	1	1	1	1	1
Ldb1	1	1	1	1	1	1	1	1	1	1	1	1
Tex264	1	1	1	1	1	1	1	1	1	1	1	1
Cacng4	1	1	1	1	1	1	1	1	1	1	1	1
Lrfn4	1	1	1	1	1	1	1	1	1	1	1	1
Vstm2l	1	1	1	1	1	1	1	1	1	1	1	1
Iscu	1	1	1	1	1	1	1	1	1	1	1	1
Psd	1	1	1	1	1	1	1	1	1	1	1	1
Pdx1	1	1	1	1	1	1	1	1	1	1	1	1
Chga	1	1	1	1	1	1	1	1	1	1	1	1
Blcap	1	1	1	1	1	1	1	1	1	1	1	1
Per3	1	1	1	1	1	1	1	1	1	1	1	1
Rab2b	1	1	1	1	1	1	1	1	1	1	1	1
Vdac1	1	1	1	1	1	1	1	1	1	1	1	1
Acly	1	1	1	1	1	1	1	1	1	1	1	1
Man2b2	1	1	1	1	1	1	1	1	1	1	1	1
Ube2o	1	1	1	1	1	1	1	1	1	1	1	1
Fbxl17	1	1	1	1	1	1	1	1	1	1	1	1
Nalcn	1	1	1	1	1	1	1	1	1	1	1	1
Bap1	1	1	1	1	1	1	1	1	1	1	1	1
Kdm5c	1	1	1	1	1	1	1	1	1	1	1	1
Helq	1	1	1	1	1	1	1	1	1	1	1	1
Tdrp	1	1	1	1	1	1	1	1	1	1	1	1
Csnk1g2	1	1	1	1	1	1	1	1	1	1	1	1
Btbd2	1	1	1	1	1	1	1	1	1	1	1	1
Ctdnep1	1	1	1	1	1	1	1	1	1	1	1	1
Fancf	1	1	1	1	1	1	1	1	1	1	1	1
Rnf41	1	1	1	1	1	1	1	1	1	1	1	1
Ranbp3	1	1	1	1	1	1	1	1	1	1	1	1
Tbc1d22a	1	1	1	1	1	1	1	1	1	1	1	1
Vat1	1	1	1	1	1	1	1	1	1	1	1	1
Ap3s2	1	1	1	1	1	1	1	1	1	1	1	1
Tsnax	1	1	1	1	1	1	1	1	1	1	1	1
Calm3	1	1	1	1	1	1	1	1	1	1	1	1
Chd7	1	1	1	1	1	1	1	1	1	1	1	1
Pla2g2f	1	1	1	1	1	1	1	1	1	1	1	1
Kctd13	1	1	1	1	1	1	1	1	1	1	1	1
Lsr	1	1	1	1	1	1	1	1	1	1	1	1
Klf5	1	1	1	1	1	1	1	1	1	1	1	1
Ugt2b35	1	1	1	1	1	1	1	1	1	1	1	1
Itpr3	1	1	1	1	1	1	1	1	1	1	1	1
Acsl3	1	1	1	1	1	1	1	1	1	1	1	1
Mansc1	1	1	1	1	1	1	1	1	1	1	1	1
Comp	1	1	1	1	1	1	1	1	1	1	1	1
Sephs2	1	1	1	1	1	1	1	1	1	1	1	1
Dok7	1	1	1	1	1	1	1	1	1	1	1	1
Tmem98	1	1	1	1	1	1	1	1	1	1	1	1
Nynrin	1	1	1	1	1	1	1	1	1	1	1	1
Kmt5a	1	1	1	1	1	1	1	1	1	1	1	1
Flrt1	1	1	1	1	1	1	1	1	1	1	1	1
Slc44a1	1	1	1	1	1	1	1	1	1	1	1	1
Siae	1	1	1	1	1	1	1	1	1	1	1	1
Nectin3	1	1	1	1	1	1	1	1	1	1	1	1
Rnf2	1	1	1	1	1	1	1	1	1	1	1	1
Dync2h1	1	1	1	1	1	1	1	1	1	1	1	1
Relt	1	1	1	1	1	1	1	1	1	1	1	1
Hmgcr	1	1	1	1	1	1	1	1	1	1	1	1
St8sia1	1	1	1	1	1	1	1	1	1	1	1	1
Tspan2	1	1	1	1	1	1	1	1	1	1	1	1
Bmt2	1	1	1	1	1	1	1	1	1	1	1	1
Mark2	1	1	1	1	1	1	1	1	1	1	1	1
Jade2	1	1	1	1	1	1	1	1	1	1	1	1
Anp32e	1	1	1	1	1	1	1	1	1	1	1	1
Inppl1	1	1	1	1	1	1	1	1	1	1	1	1
Fam20b	1	1	1	1	1	1	1	1	1	1	1	1
Znrf3	1	1	1	1	1	1	1	1	1	1	1	1
Galnt9	1	1	1	1	1	1	1	1	1	1	1	1
Mier1	1	1	1	1	1	1	1	1	1	1	1	1
Crebbp	1	1	1	1	1	1	1	1	1	1	1	1
Dhcr24	1	1	1	1	1	1	1	1	1	1	1	1
Etl4	1	1	1	1	1	1	1	1	1	1	1	1
Klf15	1	1	1	1	1	1	1	1	1	1	1	1
Nbas	1	1	1	1	1	1	1	1	1	1	1	1
Lrpprc	1	1	1	1	1	1	1	1	1	1	1	1
Rptor	1	1	1	1	1	1	1	1	1	1	1	1
Abcc4	1	1	1	1	1	1	1	1	1	1	1	1
Anxa11	1	1	1	1	1	1	1	1	1	1	1	1
Faah	1	1	1	1	1	1	1	1	1	1	1	1
Ep400	1	1	1	1	1	1	1	1	1	1	1	1
Ncoa2	1	1	1	1	1	1	1	1	1	1	1	1
Arid2	1	1	1	1	1	1	1	1	1	1	1	1
Wdr44	1	1	1	1	1	1	1	1	1	1	1	1
Zbtb40	1	1	1	1	1	1	1	1	1	1	1	1
Arid1a	1	1	1	1	1	1	1	1	1	1	1	1
Ceacam1	1	1	1	1	1	1	1	1	1	1	1	1
Jrkl	1	1	1	1	1	1	1	1	1	1	1	1
Cdh11	1	1	1	1	1	1	1	1	1	1	1	1
Ms4a4d	1	1	1	1	1	1	1	1	1	1	1	1
Slco2b1	1	1	1	1	1	1	1	1	1	1	1	1
Serping1	1	1	1	1	1	1	1	1	1	1	1	1
Sgk1	1	1	1	1	1	1	1	1	1	1	1	1
Mapk8	1	1	1	1	1	1	1	1	1	1	1	1
Il1b	1	1	1	1	1	1	1	1	1	1	1	1
Nlrp3	1	1	1	1	1	1	1	1	1	1	1	1
Mir1938	1	1	1	1	1	1	1	1	1	1	1	1
Thbs3	1	1	1	1	1	1	1	1	1	1	1	1
Mrpl47	1	1	1	1	1	1	1	1	1	1	1	1
Thap7	1	1	1	1	1	1	1	1	1	1	1	1
Riok3	1	1	1	1	1	1	1	1	1	1	1	1
Fos	1	1	1	1	1	1	1	1	1	1	1	1
Sstr2	1	1	1	1	1	1	1	1	1	1	1	1
Tbxas1	1	1	1	1	1	1	1	1	1	1	1	1
Cdkn2b	1	1	1	1	1	1	1	1	1	1	1	1
Rbbp7	1	1	1	1	1	1	1	1	1	1	1	1
Ocrl	1	1	1	1	1	1	1	1	1	1	1	1
Cops2	1	1	1	1	1	1	1	1	1	1	1	1
Chpt1	1	1	1	1	1	1	1	1	1	1	1	1
Ctps2	1	1	1	1	1	1	1	1	1	1	1	1
Gba	1	1	1	1	1	1	1	1	1	1	1	1
Unkl	1	1	1	1	1	1	1	1	1	1	1	1
Tap2	1	1	1	1	1	1	1	1	1	1	1	1
Ggt5	1	1	1	1	1	1	1	1	1	1	1	1
Mkrn2os	1	1	1	1	1	1	1	1	1	1	1	1
Ocel1	1	1	1	1	1	1	1	1	1	1	1	1
Stard3	1	1	1	1	1	1	1	1	1	1	1	1
Nptn	1	1	1	1	1	1	1	1	1	1	1	1
Amph	1	1	1	1	1	1	1	1	1	1	1	1
Glce	1	1	1	1	1	1	1	1	1	1	1	1
Grhl1	1	1	1	1	1	1	1	1	1	1	1	1
Rps6kl1	1	1	1	1	1	1	1	1	1	1	1	1
Hadha	1	1	1	1	1	1	1	1	1	1	1	1
Stk32a	1	1	1	1	1	1	1	1	1	1	1	1
Rapgef5	1	1	1	1	1	1	1	1	1	1	1	1
Dgkg	1	1	1	1	1	1	1	1	1	1	1	1
Lrp8	1	1	1	1	1	1	1	1	1	1	1	1
Aqp4	1	1	1	1	1	1	1	1	1	1	1	1
Lonrf3	1	1	1	1	1	1	1	1	1	1	1	1
Adgrd1	1	1	1	1	1	1	1	1	1	1	1	1
Sqor	1	1	1	1	1	1	1	1	1	1	1	1
Poli	1	1	1	1	1	1	1	1	1	1	1	1
Efcab5	1	1	1	1	1	1	1	1	1	1	1	1
Faap20	1	1	1	1	1	1	1	1	1	1	1	1
Chac1	1	1	1	1	1	1	1	1	1	1	1	1
Reep1	1	1	1	1	1	1	1	1	1	1	1	1
Ctsd	1	1	1	1	1	1	1	1	1	1	1	1
Fndc5	1	1	1	1	1	1	1	1	1	1	1	1
Hspa1b	1	1	1	1	1	1	1	1	1	1	1	1
Zc3h3	1	1	1	1	1	1	1	1	1	1	1	1
Cplx1	1	1	1	1	1	1	1	1	1	1	1	1
Wdr25	1	1	1	1	1	1	1	1	1	1	1	1
Grb10	1	1	1	1	1	1	1	1	1	1	1	1
Prpf38b	1	1	1	1	1	1	1	1	1	1	1	1
Galnt14	1	1	1	1	1	1	1	1	1	1	1	1
Gpr137b	1	1	1	1	1	1	1	1	1	1	1	1
Asb8	1	1	1	1	1	1	1	1	1	1	1	1
Gnb1	1	1	1	1	1	1	1	1	1	1	1	1
Bend7	1	1	1	1	1	1	1	1	1	1	1	1
Ptger3	1	1	1	1	1	1	1	1	1	1	1	1
Map4	1	1	1	1	1	1	1	1	1	1	1	1
Nacc2	1	1	1	1	1	1	1	1	1	1	1	1
Tmem184a	1	1	1	1	1	1	1	1	1	1	1	1
Nrbf2	1	1	1	1	1	1	1	1	1	1	1	1
Slc16a12	1	1	1	1	1	1	1	1	1	1	1	1
St6galnac5	1	1	1	1	1	1	1	1	1	1	1	1
Tmem127	1	1	1	1	1	1	1	1	1	1	1	1
Man1c1	1	1	1	1	1	1	1	1	1	1	1	1
Nfe2l1	1	1	1	1	1	1	1	1	1	1	1	1
Ptpn11	1	1	1	1	1	1	1	1	1	1	1	1
Syn1	1	1	1	1	1	1	1	1	1	1	1	1
Sh3bp5l	1	1	1	1	1	1	1	1	1	1	1	1
Kdm1a	1	1	1	1	1	1	1	1	1	1	1	1
Bcl2l13	1	1	1	1	1	1	1	1	1	1	1	1
Ern1	1	1	1	1	1	1	1	1	1	1	1	1
Pde4dip	1	1	1	1	1	1	1	1	1	1	1	1
Cdc23	1	1	1	1	1	1	1	1	1	1	1	1
Cdkl2	1	1	1	1	1	1	1	1	1	1	1	1
Hsdl2	1	1	1	1	1	1	1	1	1	1	1	1
Ighv5-12	1	1	1	1	1	1	1	1	1	1	1	1
Glb1	1	1	1	1	1	1	1	1	1	1	1	1
Igkv4-86	1	1	1	1	1	1	1	1	1	1	1	1
Ergic1	1	1	1	1	1	1	1	1	1	1	1	1
Napg	1	1	1	1	1	1	1	1	1	1	1	1
P3h1	1	1	1	1	1	1	1	1	1	1	1	1
Srp72	1	1	1	1	1	1	1	1	1	1	1	1
Bsdc1	1	1	1	1	1	1	1	1	1	1	1	1
Prmt2	1	1	1	1	1	1	1	1	1	1	1	1
Nub1	1	1	1	1	1	1	1	1	1	1	1	1
Rsph3a	1	1	1	1	1	1	1	1	1	1	1	1
Tor1b	1	1	1	1	1	1	1	1	1	1	1	1
Zfp697	1	1	1	1	1	1	1	1	1	1	1	1
Plod3	1	1	1	1	1	1	1	1	1	1	1	1
Zfp69	1	1	1	1	1	1	1	1	1	1	1	1
Fam219a	1	1	1	1	1	1	1	1	1	1	1	1
Igkv5-37	1	1	1	1	1	1	1	1	1	1	1	1
Gng11	1	1	1	1	1	1	1	1	1	1	1	1
Nupr1	1	1	1	1	1	1	1	1	1	1	1	1
Guf1	1	1	1	1	1	1	1	1	1	1	1	1
Rhoa	1	1	1	1	1	1	1	1	1	1	1	1
Zwilch	1	1	1	1	1	1	1	1	1	1	1	1
Suclg1	1	1	1	1	1	1	1	1	1	1	1	1
Hacd1	1	1	1	1	1	1	1	1	1	1	1	1
Mrpl44	1	1	1	1	1	1	1	1	1	1	1	1
Adsl	1	1	1	1	1	1	1	1	1	1	1	1
Pycrl	1	1	1	1	1	1	1	1	1	1	1	1
Rida	1	1	1	1	1	1	1	1	1	1	1	1
Capza2	1	1	1	1	1	1	1	1	1	1	1	1
Prpf39	1	1	1	1	1	1	1	1	1	1	1	1
Ccnc	1	1	1	1	1	1	1	1	1	1	1	1
Pelo	1	1	1	1	1	1	1	1	1	1	1	1
Clec12a	1	1	1	1	1	1	1	1	1	1	1	1
Ecsit	1	1	1	1	1	1	1	1	1	1	1	1
Rft1	1	1	1	1	1	1	1	1	1	1	1	1
Psmb7	1	1	1	1	1	1	1	1	1	1	1	1
Odf2l	1	1	1	1	1	1	1	1	1	1	1	1
Tada1	1	1	1	1	1	1	1	1	1	1	1	1
Mdh1	1	1	1	1	1	1	1	1	1	1	1	1
Syt5	1	1	1	1	1	1	1	1	1	1	1	1
Tmem40	1	1	1	1	1	1	1	1	1	1	1	1
Klhdc2	1	1	1	1	1	1	1	1	1	1	1	1
Gatm	1	1	1	1	1	1	1	1	1	1	1	1
Gstt4	1	1	1	1	1	1	1	1	1	1	1	1
Tgds	1	1	1	1	1	1	1	1	1	1	1	1
Lamtor3	1	1	1	1	1	1	1	1	1	1	1	1
Orc5	1	1	1	1	1	1	1	1	1	1	1	1
Zdhhc22	1	1	1	1	1	1	1	1	1	1	1	1
Nck1	1	1	1	1	1	1	1	1	1	1	1	1
Arl2	1	1	1	1	1	1	1	1	1	1	1	1
Bex3	1	1	1	1	1	1	1	1	1	1	1	1
Vmp1	1	1	1	1	1	1	1	1	1	1	1	1
Slc35g2	1	1	1	1	1	1	1	1	1	1	1	1
Timm17a	1	1	1	1	1	1	1	1	1	1	1	1
Mycbp	1	1	1	1	1	1	1	1	1	1	1	1
Psmc1	1	1	1	1	1	1	1	1	1	1	1	1
Clpp	1	1	1	1	1	1	1	1	1	1	1	1
Ppp2r2d	1	1	1	1	1	1	1	1	1	1	1	1
Ppox	1	1	1	1	1	1	1	1	1	1	1	1
Tmem14a	1	1	1	1	1	1	1	1	1	1	1	1
Atat1	1	1	1	1	1	1	1	1	1	1	1	1
Selenom	1	1	1	1	1	1	1	1	1	1	1	1
Pin4	1	1	1	1	1	1	1	1	1	1	1	1
Rpl36al	1	1	1	1	1	1	1	1	1	1	1	1
Mrps18b	1	1	1	1	1	1	1	1	1	1	1	1
Rpf1	1	1	1	1	1	1	1	1	1	1	1	1
Sec11c	1	1	1	1	1	1	1	1	1	1	1	1
Ociad1	1	1	1	1	1	1	1	1	1	1	1	1
2019-09-07	1	1	1	1	1	1	1	1	1	1	1	1
Cdk7	1	1	1	1	1	1	1	1	1	1	1	1
Phospho2	1	1	1	1	1	1	1	1	1	1	1	1
Rbx1	1	1	1	1	1	1	1	1	1	1	1	1
Rabepk	1	1	1	1	1	1	1	1	1	1	1	1
Lamp2	1	1	1	1	1	1	1	1	1	1	1	1
Nudt7	1	1	1	1	1	1	1	1	1	1	1	1
Abracl	1	1	1	1	1	1	1	1	1	1	1	1
Dynll1	1	1	1	1	1	1	1	1	1	1	1	1
Ccdc28a	1	1	1	1	1	1	1	1	1	1	1	1
Nme1	1	1	1	1	1	1	1	1	1	1	1	1
Polb	1	1	1	1	1	1	1	1	1	1	1	1
Psmc6	1	1	1	1	1	1	1	1	1	1	1	1
Psph	1	1	1	1	1	1	1	1	1	1	1	1
Fam193b	1	1	1	1	1	1	1	1	1	1	1	1
Isg20	1	1	1	1	1	1	1	1	1	1	1	1
Gpr180	1	1	1	1	1	1	1	1	1	1	1	1
Tbc1d7	1	1	1	1	1	1	1	1	1	1	1	1
Snrnp35	1	1	1	1	1	1	1	1	1	1	1	1
Stx5a	1	1	1	1	1	1	1	1	1	1	1	1
Abce1	1	1	1	1	1	1	1	1	1	1	1	1
Nucb2	1	1	1	1	1	1	1	1	1	1	1	1
Tmbim4	1	1	1	1	1	1	1	1	1	1	1	1
Yipf5	1	1	1	1	1	1	1	1	1	1	1	1
Manf	1	1	1	1	1	1	1	1	1	1	1	1
Eef1akmt3	1	1	1	1	1	1	1	1	1	1	1	1
Kctd8	1	1	1	1	1	1	1	1	1	1	1	1
Gpr182	1	1	1	1	1	1	1	1	1	1	1	1
Hars	1	1	1	1	1	1	1	1	1	1	1	1
Tiam1	1	1	1	1	1	1	1	1	1	1	1	1
Lhfp	1	1	1	1	1	1	1	1	1	1	1	1
Pgm5	1	1	1	1	1	1	1	1	1	1	1	1
Eef1a2	1	1	1	1	1	1	1	1	1	1	1	1
P3h2	1	1	1	1	1	1	1	1	1	1	1	1
Hpgds	1	1	1	1	1	1	1	1	1	1	1	1
Tmem273	1	1	1	1	1	1	1	1	1	1	1	1
Psmd12	1	1	1	1	1	1	1	1	1	1	1	1
Rnf11	1	1	1	1	1	1	1	1	1	1	1	1
Zfp874b	1	1	1	1	1	1	1	1	1	1	1	1
Jhy	1	1	1	1	1	1	1	1	1	1	1	1
Ttc8	1	1	1	1	1	1	1	1	1	1	1	1
Hapln4	1	1	1	1	1	1	1	1	1	1	1	1
Fam114a1	1	1	1	1	1	1	1	1	1	1	1	1
Tbc1d19	1	1	1	1	1	1	1	1	1	1	1	1
Calr	1	1	1	1	1	1	1	1	1	1	1	1
Sdcbp	1	1	1	1	1	1	1	1	1	1	1	1
Rsph9	1	1	1	1	1	1	1	1	1	1	1	1
Tmed5	1	1	1	1	1	1	1	1	1	1	1	1
Nudt10	1	1	1	1	1	1	1	1	1	1	1	1
Rasl11b	1	1	1	1	1	1	1	1	1	1	1	1
Pde8b	1	1	1	1	1	1	1	1	1	1	1	1
Gpr19	1	1	1	1	1	1	1	1	1	1	1	1
Pstpip2	1	1	1	1	1	1	1	1	1	1	1	1
Ddo	1	1	1	1	1	1	1	1	1	1	1	1
Igfals	1	1	1	1	1	1	1	1	1	1	1	1
Atxn10	1	1	1	1	1	1	1	1	1	1	1	1
Sntg2	1	1	1	1	1	1	1	1	1	1	1	1
Enox1	1	1	1	1	1	1	1	1	1	1	1	1
Rtkn2	1	1	1	1	1	1	1	1	1	1	1	1
Apobec1	1	1	1	1	1	1	1	1	1	1	1	1
Lrrc55	1	1	1	1	1	1	1	1	1	1	1	1
Penk	1	1	1	1	1	1	1	1	1	1	1	1
Syndig1	1	1	1	1	1	1	1	1	1	1	1	1
Hcn1	1	1	1	1	1	1	1	1	1	1	1	1
Zscan18	1	1	1	1	1	1	1	1	1	1	1	1
Prpf3	1	1	1	1	1	1	1	1	1	1	1	1
Zfp330	1	1	1	1	1	1	1	1	1	1	1	1
Oxnad1	1	1	1	1	1	1	1	1	1	1	1	1
Ifrd1	1	1	1	1	1	1	1	1	1	1	1	1
Chn1	1	1	1	1	1	1	1	1	1	1	1	1
Tubg1	1	1	1	1	1	1	1	1	1	1	1	1
Armc9	1	1	1	1	1	1	1	1	1	1	1	1
Zfp410	1	1	1	1	1	1	1	1	1	1	1	1
Nr1h3	1	1	1	1	1	1	1	1	1	1	1	1
Ube2a	1	1	1	1	1	1	1	1	1	1	1	1
Minar2	1	1	1	1	1	1	1	1	1	1	1	1
Slfn2	1	1	1	1	1	1	1	1	1	1	1	1
Uckl1	1	1	1	1	1	1	1	1	1	1	1	1
Rfc2	1	1	1	1	1	1	1	1	1	1	1	1
Srsf11	1	1	1	1	1	1	1	1	1	1	1	1
Xaf1	1	1	1	1	1	1	1	1	1	1	1	1
Rom1	1	1	1	1	1	1	1	1	1	1	1	1
Ilkap	1	1	1	1	1	1	1	1	1	1	1	1
H2afv	1	1	1	1	1	1	1	1	1	1	1	1
Hnrnpc	1	1	1	1	1	1	1	1	1	1	1	1
Olfr330	1	1	1	1	1	1	1	1	1	1	1	1
Pole3	1	1	1	1	1	1	1	1	1	1	1	1
Cyb5a	1	1	1	1	1	1	1	1	1	1	1	1
Mrpl9	1	1	1	1	1	1	1	1	1	1	1	1
Slc25a4	1	1	1	1	1	1	1	1	1	1	1	1
Dnajb3	1	1	1	1	1	1	1	1	1	1	1	1
Fbxw15	1	1	1	1	1	1	1	1	1	1	1	1
Cwc15	1	1	1	1	1	1	1	1	1	1	1	1
Ripply3	1	1	1	1	1	1	1	1	1	1	1	1
Cym	1	1	1	1	1	1	1	1	1	1	1	1
Eif4a1	1	1	1	1	1	1	1	1	1	1	1	1
Zdhhc16	1	1	1	1	1	1	1	1	1	1	1	1
Prr13	1	1	1	1	1	1	1	1	1	1	1	1
Cops7b	1	1	1	1	1	1	1	1	1	1	1	1
Angptl6	1	1	1	1	1	1	1	1	1	1	1	1
Cxcl2	1	1	1	1	1	1	1	1	1	1	1	1
Eif1	1	1	1	1	1	1	1	1	1	1	1	1
Eva1b	1	1	1	1	1	1	1	1	1	1	1	1
Rpusd4	1	1	1	1	1	1	1	1	1	1	1	1
Ap1s1	1	1	1	1	1	1	1	1	1	1	1	1
Hist1h1c	1	1	1	1	1	1	1	1	1	1	1	1
Wdr83os	1	1	1	1	1	1	1	1	1	1	1	1

## Sheet: Heat maps1_HID
6	14923.4					212.824	12181.8
3	14923.4					97.7966	12181.8
3	3072.23					97.7966	1783.07
1.5	3072.23					47.1738	1783.07
1.5	819.47					47.1738	366.298
1	819.47					22.1465	366.298
1	0					22.1465	273.951
1	819.47					8.67188	273.951
2	819.47					8.67188	98.5989
2	0					3.71875	98.5989
2	819.47					3.71875	33.4204
1.5	819.47					1.75	33.4204
1.5	3072.23					1.75	14.9776
4.5	3072.23					1	14.9776
4.5	2315.01					1	0
3.5	2315.01					1	14.9776
3.5	1436.27					2.5	14.9776
3	1436.27					2.5	10.4469
3	0					2	10.4469
3	1436.27					2	0
4	1436.27					2	10.4469
4	0					3	10.4469
4	1436.27					3	0
3.5	1436.27					3	10.4469
3.5	2315.01					2.5	10.4469
5.5	2315.01					2.5	14.9776
5.5	1495.27					1.75	14.9776
5	1495.27					1.75	33.4204
5	0					5.6875	33.4204
5	1495.27					5.6875	16.5534
6	1495.27					4.5	16.5534
6	0					4.5	2.45
6	1495.27					4	2.45
5.5	1495.27					4	0
5.5	2315.01					4	2.45
4.5	2315.01					5	2.45
4.5	3072.23					5	0
3	3072.23					5	2.45
3	14923.4					4.5	2.45
9	14923.4					4.5	16.5534
9	9140.18					6.875	16.5534
7.5	9140.18					6.875	12.1504
7.5	1590.86					6	12.1504
7	1590.86					6	0
7	0					6	12.1504
7	1590.86					7.75	12.1504
8	1590.86					7.75	6.20607
8	0					7	6.20607
8	1590.86					7	0
7.5	1590.86					7	6.20607
7.5	9140.18					8.5	6.20607
10.5	9140.18					8.5	5.68887
10.5	2754.68					8	5.68887
9.5	2754.68					8	0
9.5	1044.99					8	5.68887
9	1044.99					9	5.68887
9	0					9	0
9	1044.99					9	5.68887
10	1044.99					8.5	5.68887
10	0					8.5	6.20607
10	1044.99					7.75	6.20607
9.5	1044.99					7.75	12.1504
9.5	2754.68					6.875	12.1504
11.5	2754.68					6.875	16.5534
11.5	2041.62					5.6875	16.5534
11	2041.62					5.6875	33.4204
11	0					3.71875	33.4204
11	2041.62					3.71875	98.5989
12	2041.62					13.625	98.5989
12	0					13.625	37.4739
12	2041.62					10.75	37.4739
11.5	2041.62					10.75	12.9492
11.5	2754.68					10	12.9492
10.5	2754.68					10	0
10.5	9140.18					10	12.9492
9	9140.18					11.5	12.9492
9	14923.4					11.5	9.32631
6	14923.4					11	9.32631
						11	0
						11	9.32631
						12	9.32631
						12	0
						12	9.32631
						11.5	9.32631
						11.5	12.9492
						10.75	12.9492
						10.75	37.4739
						16.5	37.4739
						16.5	15.0418
						14.5	15.0418
						14.5	6.26476
						13.5	6.26476
						13.5	1.62416
						13	1.62416
						13	0
						13	1.62416
						14	1.62416
						14	0
						14	1.62416
						13.5	1.62416
						13.5	6.26476
						15.5	6.26476
						15.5	2.42392
						15	2.42392
						15	0
						15	2.42392
						16	2.42392
						16	0
						16	2.42392
						15.5	2.42392
						15.5	6.26476
						14.5	6.26476
						14.5	15.0418
						18.5	15.0418
						18.5	7.33662
						17.5	7.33662
						17.5	3.8554
						17	3.8554
						17	0
						17	3.8554
						18	3.8554
						18	0
						18	3.8554
						17.5	3.8554
						17.5	7.33662
						19.5	7.33662
						19.5	4.30907
						19	4.30907
						19	0
						19	4.30907
						20	4.30907
						20	0
						20	4.30907
						19.5	4.30907
						19.5	7.33662
						18.5	7.33662
						18.5	15.0418
						16.5	15.0418
						16.5	37.4739
						13.625	37.4739
						13.625	98.5989
						8.67188	98.5989
						8.67188	273.951
						35.6211	273.951
						35.6211	128.018
						27.2344	128.018
						27.2344	63.3184
						22.6562	63.3184
						22.6562	16.9561
						21	16.9561
						21	0
						21	16.9561
						24.3125	16.9561
						24.3125	15.7947
						22.5	15.7947
						22.5	3.055
						22	3.055
						22	0
						22	3.055
						23	3.055
						23	0
						23	3.055
						22.5	3.055
						22.5	15.7947
						26.125	15.7947
						26.125	7.42877
						24.75	7.42877
						24.75	3.61086
						24	3.61086
						24	0
						24	3.61086
						25.5	3.61086
						25.5	1.6526
						25	1.6526
						25	0
						25	1.6526
						26	1.6526
						26	0
						26	1.6526
						25.5	1.6526
						25.5	3.61086
						24.75	3.61086
						24.75	7.42877
						27.5	7.42877
						27.5	4.2066
						27	4.2066
						27	0
						27	4.2066
						28	4.2066
						28	0
						28	4.2066
						27.5	4.2066
						27.5	7.42877
						26.125	7.42877
						26.125	15.7947
						24.3125	15.7947
						24.3125	16.9561
						22.6562	16.9561
						22.6562	63.3184
						31.8125	63.3184
						31.8125	22.1734
						29.875	22.1734
						29.875	8.77063
						29	8.77063
						29	0
						29	8.77063
						30.75	8.77063
						30.75	4.55206
						30	4.55206
						30	0
						30	4.55206
						31.5	4.55206
						31.5	2.18332
						31	2.18332
						31	0
						31	2.18332
						32	2.18332
						32	0
						32	2.18332
						31.5	2.18332
						31.5	4.55206
						30.75	4.55206
						30.75	8.77063
						29.875	8.77063
						29.875	22.1734
						33.75	22.1734
						33.75	8.8676
						33	8.8676
						33	0
						33	8.8676
						34.5	8.8676
						34.5	2.70903
						34	2.70903
						34	0
						34	2.70903
						35	2.70903
						35	0
						35	2.70903
						34.5	2.70903
						34.5	8.8676
						33.75	8.8676
						33.75	22.1734
						31.8125	22.1734
						31.8125	63.3184
						27.2344	63.3184
						27.2344	128.018
						44.0078	128.018
						44.0078	81.9854
						38.625	81.9854
						38.625	31.4223
						36.75	31.4223
						36.75	11.8786
						36	11.8786
						36	0
						36	11.8786
						37.5	11.8786
						37.5	5.89684
						37	5.89684
						37	0
						37	5.89684
						38	5.89684
						38	0
						38	5.89684
						37.5	5.89684
						37.5	11.8786
						36.75	11.8786
						36.75	31.4223
						40.5	31.4223
						40.5	12.7278
						39.5	12.7278
						39.5	8.48961
						39	8.48961
						39	0
						39	8.48961
						40	8.48961
						40	0
						40	8.48961
						39.5	8.48961
						39.5	12.7278
						41.5	12.7278
						41.5	9.02331
						41	9.02331
						41	0
						41	9.02331
						42	9.02331
						42	0
						42	9.02331
						41.5	9.02331
						41.5	12.7278
						40.5	12.7278
						40.5	31.4223
						38.625	31.4223
						38.625	81.9854
						49.3906	81.9854
						49.3906	67.6382
						45.875	67.6382
						45.875	12.7571
						43.875	12.7571
						43.875	7.2107
						43	7.2107
						43	0
						43	7.2107
						44.75	7.2107
						44.75	6.15262
						44	6.15262
						44	0
						44	6.15262
						45.5	6.15262
						45.5	3.20236
						45	3.20236
						45	0
						45	3.20236
						46	3.20236
						46	0
						46	3.20236
						45.5	3.20236
						45.5	6.15262
						44.75	6.15262
						44.75	7.2107
						43.875	7.2107
						43.875	12.7571
						47.875	12.7571
						47.875	10.713
						47	10.713
						47	0
						47	10.713
						48.75	10.713
						48.75	6.67942
						48	6.67942
						48	0
						48	6.67942
						49.5	6.67942
						49.5	4.07402
						49	4.07402
						49	0
						49	4.07402
						50	4.07402
						50	0
						50	4.07402
						49.5	4.07402
						49.5	6.67942
						48.75	6.67942
						48.75	10.713
						47.875	10.713
						47.875	12.7571
						45.875	12.7571
						45.875	67.6382
						52.9062	67.6382
						52.9062	18.8905
						51.5	18.8905
						51.5	7.4719
						51	7.4719
						51	0
						51	7.4719
						52	7.4719
						52	0
						52	7.4719
						51.5	7.4719
						51.5	18.8905
						54.3125	18.8905
						54.3125	15.7313
						53	15.7313
						53	0
						53	15.7313
						55.625	15.7313
						55.625	12.8038
						54.5	12.8038
						54.5	0.591564
						54	0.591564
						54	0
						54	0.591564
						55	0.591564
						55	0
						55	0.591564
						54.5	0.591564
						54.5	12.8038
						56.75	12.8038
						56.75	3.85363
						56	3.85363
						56	0
						56	3.85363
						57.5	3.85363
						57.5	1.97117
						57	1.97117
						57	0
						57	1.97117
						58	1.97117
						58	0
						58	1.97117
						57.5	1.97117
						57.5	3.85363
						56.75	3.85363
						56.75	12.8038
						55.625	12.8038
						55.625	15.7313
						54.3125	15.7313
						54.3125	18.8905
						52.9062	18.8905
						52.9062	67.6382
						49.3906	67.6382
						49.3906	81.9854
						44.0078	81.9854
						44.0078	128.018
						35.6211	128.018
						35.6211	273.951
						22.1465	273.951
						22.1465	366.298
						72.2012	366.298
						72.2012	329.278
						62.9062	329.278
						62.9062	57.4676
						60.5	57.4676
						60.5	23.5433
						59.5	23.5433
						59.5	13.0328
						59	13.0328
						59	0
						59	13.0328
						60	13.0328
						60	0
						60	13.0328
						59.5	13.0328
						59.5	23.5433
						61.5	23.5433
						61.5	14.9299
						61	14.9299
						61	0
						61	14.9299
						62	14.9299
						62	0
						62	14.9299
						61.5	14.9299
						61.5	23.5433
						60.5	23.5433
						60.5	57.4676
						65.3125	57.4676
						65.3125	36.5462
						63.75	36.5462
						63.75	16.4728
						63	16.4728
						63	0
						63	16.4728
						64.5	16.4728
						64.5	8.82644
						64	8.82644
						64	0
						64	8.82644
						65	8.82644
						65	0
						65	8.82644
						64.5	8.82644
						64.5	16.4728
						63.75	16.4728
						63.75	36.5462
						66.875	36.5462
						66.875	17.5486
						66	17.5486
						66	0
						66	17.5486
						67.75	17.5486
						67.75	10.1944
						67	10.1944
						67	0
						67	10.1944
						68.5	10.1944
						68.5	3.06052
						68	3.06052
						68	0
						68	3.06052
						69	3.06052
						69	0
						69	3.06052
						68.5	3.06052
						68.5	10.1944
						67.75	10.1944
						67.75	17.5486
						66.875	17.5486
						66.875	36.5462
						65.3125	36.5462
						65.3125	57.4676
						62.9062	57.4676
						62.9062	329.278
						81.4961	329.278
						81.4961	182.094
						73.2188	182.094
						73.2188	70.6351
						70.75	70.6351
						70.75	21.2252
						70	21.2252
						70	0
						70	21.2252
						71.5	21.2252
						71.5	8.4814
						71	8.4814
						71	0
						71	8.4814
						72	8.4814
						72	0
						72	8.4814
						71.5	8.4814
						71.5	21.2252
						70.75	21.2252
						70.75	70.6351
						75.6875	70.6351
						75.6875	37.7345
						73.75	37.7345
						73.75	14.058
						73	14.058
						73	0
						73	14.058
						74.5	14.058
						74.5	10.6126
						74	10.6126
						74	0
						74	10.6126
						75	10.6126
						75	0
						75	10.6126
						74.5	10.6126
						74.5	14.058
						73.75	14.058
						73.75	37.7345
						77.625	37.7345
						77.625	21.0566
						76.5	21.0566
						76.5	3.51055
						76	3.51055
						76	0
						76	3.51055
						77	3.51055
						77	0
						77	3.51055
						76.5	3.51055
						76.5	21.0566
						78.75	21.0566
						78.75	4.67727
						78	4.67727
						78	0
						78	4.67727
						79.5	4.67727
						79.5	1.85271
						79	1.85271
						79	0
						79	1.85271
						80	1.85271
						80	0
						80	1.85271
						79.5	1.85271
						79.5	4.67727
						78.75	4.67727
						78.75	21.0566
						77.625	21.0566
						77.625	37.7345
						75.6875	37.7345
						75.6875	70.6351
						73.2188	70.6351
						73.2188	182.094
						89.7734	182.094
						89.7734	104.688
						83.5625	104.688
						83.5625	39.1194
						81.5	39.1194
						81.5	15.807
						81	15.807
						81	0
						81	15.807
						82	15.807
						82	0
						82	15.807
						81.5	15.807
						81.5	39.1194
						85.625	39.1194
						85.625	23.1234
						83.75	23.1234
						83.75	7.15889
						83	7.15889
						83	0
						83	7.15889
						84.5	7.15889
						84.5	1.95645
						84	1.95645
						84	0
						84	1.95645
						85	1.95645
						85	0
						85	1.95645
						84.5	1.95645
						84.5	7.15889
						83.75	7.15889
						83.75	23.1234
						87.5	23.1234
						87.5	14.5626
						86.5	14.5626
						86.5	6.65445
						86	6.65445
						86	0
						86	6.65445
						87	6.65445
						87	0
						87	6.65445
						86.5	6.65445
						86.5	14.5626
						88.5	14.5626
						88.5	9.64623
						88	9.64623
						88	0
						88	9.64623
						89	9.64623
						89	0
						89	9.64623
						88.5	9.64623
						88.5	14.5626
						87.5	14.5626
						87.5	23.1234
						85.625	23.1234
						85.625	39.1194
						83.5625	39.1194
						83.5625	104.688
						95.9844	104.688
						95.9844	57.4309
						91.625	57.4309
						91.625	23.3162
						90.5	23.3162
						90.5	8.91719
						90	8.91719
						90	0
						90	8.91719
						91	8.91719
						91	0
						91	8.91719
						90.5	8.91719
						90.5	23.3162
						92.75	23.3162
						92.75	10.6772
						92	10.6772
						92	0
						92	10.6772
						93.5	10.6772
						93.5	2.62555
						93	2.62555
						93	0
						93	2.62555
						94	2.62555
						94	0
						94	2.62555
						93.5	2.62555
						93.5	10.6772
						92.75	10.6772
						92.75	23.3162
						91.625	23.3162
						91.625	57.4309
						100.344	57.4309
						100.344	41.7212
						97.0625	41.7212
						97.0625	17.9043
						95.5	17.9043
						95.5	6.20798
						95	6.20798
						95	0
						95	6.20798
						96	6.20798
						96	0
						96	6.20798
						95.5	6.20798
						95.5	17.9043
						98.625	17.9043
						98.625	11.9627
						97.5	11.9627
						97.5	2.97641
						97	2.97641
						97	0
						97	2.97641
						98	2.97641
						98	0
						98	2.97641
						97.5	2.97641
						97.5	11.9627
						99.75	11.9627
						99.75	8.00326
						99	8.00326
						99	0
						99	8.00326
						100.5	8.00326
						100.5	4.70268
						100	4.70268
						100	0
						100	4.70268
						101	4.70268
						101	0
						101	4.70268
						100.5	4.70268
						100.5	8.00326
						99.75	8.00326
						99.75	11.9627
						98.625	11.9627
						98.625	17.9043
						97.0625	17.9043
						97.0625	41.7212
						103.625	41.7212
						103.625	26.2562
						102.5	26.2562
						102.5	9.80104
						102	9.80104
						102	0
						102	9.80104
						103	9.80104
						103	0
						103	9.80104
						102.5	9.80104
						102.5	26.2562
						104.75	26.2562
						104.75	12.7976
						104	12.7976
						104	0
						104	12.7976
						105.5	12.7976
						105.5	6.03848
						105	6.03848
						105	0
						105	6.03848
						106	6.03848
						106	0
						106	6.03848
						105.5	6.03848
						105.5	12.7976
						104.75	12.7976
						104.75	26.2562
						103.625	26.2562
						103.625	41.7212
						100.344	41.7212
						100.344	57.4309
						95.9844	57.4309
						95.9844	104.688
						89.7734	104.688
						89.7734	182.094
						81.4961	182.094
						81.4961	329.278
						72.2012	329.278
						72.2012	366.298
						47.1738	366.298
						47.1738	1783.07
						148.419	1783.07
						148.419	453.264
						119.717	453.264
						119.717	183.738
						111.734	183.738
						111.734	66.1712
						108.25	66.1712
						108.25	23.8487
						107	23.8487
						107	0
						107	23.8487
						109.5	23.8487
						109.5	13.0169
						108.5	13.0169
						108.5	4.47613
						108	4.47613
						108	0
						108	4.47613
						109	4.47613
						109	0
						109	4.47613
						108.5	4.47613
						108.5	13.0169
						110.5	13.0169
						110.5	5.92054
						110	5.92054
						110	0
						110	5.92054
						111	5.92054
						111	0
						111	5.92054
						110.5	5.92054
						110.5	13.0169
						109.5	13.0169
						109.5	23.8487
						108.25	23.8487
						108.25	66.1712
						115.219	66.1712
						115.219	28.8629
						113.5	28.8629
						113.5	9.66913
						112.5	9.66913
						112.5	3.03019
						112	3.03019
						112	0
						112	3.03019
						113	3.03019
						113	0
						113	3.03019
						112.5	3.03019
						112.5	9.66913
						114.5	9.66913
						114.5	6.11306
						114	6.11306
						114	0
						114	6.11306
						115	6.11306
						115	0
						115	6.11306
						114.5	6.11306
						114.5	9.66913
						113.5	9.66913
						113.5	28.8629
						116.938	28.8629
						116.938	18.0564
						116	18.0564
						116	0
						116	18.0564
						117.875	18.0564
						117.875	7.4559
						117	7.4559
						117	0
						117	7.4559
						118.75	7.4559
						118.75	5.33224
						118	5.33224
						118	0
						118	5.33224
						119.5	5.33224
						119.5	2.54089
						119	2.54089
						119	0
						119	2.54089
						120	2.54089
						120	0
						120	2.54089
						119.5	2.54089
						119.5	5.33224
						118.75	5.33224
						118.75	7.4559
						117.875	7.4559
						117.875	18.0564
						116.938	18.0564
						116.938	28.8629
						115.219	28.8629
						115.219	66.1712
						111.734	66.1712
						111.734	183.738
						127.699	183.738
						127.699	104.43
						123.062	104.43
						123.062	36.3936
						121.5	36.3936
						121.5	10.8018
						121	10.8018
						121	0
						121	10.8018
						122	10.8018
						122	0
						122	10.8018
						121.5	10.8018
						121.5	36.3936
						124.625	36.3936
						124.625	22.4466
						123.5	22.4466
						123.5	9.73037
						123	9.73037
						123	0
						123	9.73037
						124	9.73037
						124	0
						124	9.73037
						123.5	9.73037
						123.5	22.4466
						125.75	22.4466
						125.75	16.5476
						125	16.5476
						125	0
						125	16.5476
						126.5	16.5476
						126.5	8.70374
						126	8.70374
						126	0
						126	8.70374
						127	8.70374
						127	0
						127	8.70374
						126.5	8.70374
						126.5	16.5476
						125.75	16.5476
						125.75	22.4466
						124.625	22.4466
						124.625	36.3936
						123.062	36.3936
						123.062	104.43
						132.336	104.43
						132.336	54.1082
						128.875	54.1082
						128.875	12.93
						128	12.93
						128	0
						128	12.93
						129.75	12.93
						129.75	10.2953
						129	10.2953
						129	0
						129	10.2953
						130.5	10.2953
						130.5	4.6101
						130	4.6101
						130	0
						130	4.6101
						131	4.6101
						131	0
						131	4.6101
						130.5	4.6101
						130.5	10.2953
						129.75	10.2953
						129.75	12.93
						128.875	12.93
						128.875	54.1082
						135.797	54.1082
						135.797	46.6886
						133.625	46.6886
						133.625	19.9199
						132.5	19.9199
						132.5	6.15447
						132	6.15447
						132	0
						132	6.15447
						133	6.15447
						133	0
						133	6.15447
						132.5	6.15447
						132.5	19.9199
						134.75	19.9199
						134.75	16.6302
						134	16.6302
						134	0
						134	16.6302
						135.5	16.6302
						135.5	12.5473
						135	12.5473
						135	0
						135	12.5473
						136	12.5473
						136	0
						136	12.5473
						135.5	12.5473
						135.5	16.6302
						134.75	16.6302
						134.75	19.9199
						133.625	19.9199
						133.625	46.6886
						137.969	46.6886
						137.969	21.5829
						137	21.5829
						137	0
						137	21.5829
						138.938	21.5829
						138.938	11.7473
						138	11.7473
						138	0
						138	11.7473
						139.875	11.7473
						139.875	6.9092
						139	6.9092
						139	0
						139	6.9092
						140.75	6.9092
						140.75	3.59425
						140	3.59425
						140	0
						140	3.59425
						141.5	3.59425
						141.5	1.44001
						141	1.44001
						141	0
						141	1.44001
						142	1.44001
						142	0
						142	1.44001
						141.5	1.44001
						141.5	3.59425
						140.75	3.59425
						140.75	6.9092
						139.875	6.9092
						139.875	11.7473
						138.938	11.7473
						138.938	21.5829
						137.969	21.5829
						137.969	46.6886
						135.797	46.6886
						135.797	54.1082
						132.336	54.1082
						132.336	104.43
						127.699	104.43
						127.699	183.738
						119.717	183.738
						119.717	453.264
						177.122	453.264
						177.122	414.895
						155.25	414.895
						155.25	137.308
						148.25	137.308
						148.25	53.3038
						145.25	53.3038
						145.25	19.1155
						143.75	19.1155
						143.75	13.8807
						143	13.8807
						143	0
						143	13.8807
						144.5	13.8807
						144.5	8.59204
						144	8.59204
						144	0
						144	8.59204
						145	8.59204
						145	0
						145	8.59204
						144.5	8.59204
						144.5	13.8807
						143.75	13.8807
						143.75	19.1155
						146.75	19.1155
						146.75	14.6412
						146	14.6412
						146	0
						146	14.6412
						147.5	14.6412
						147.5	10.0671
						147	10.0671
						147	0
						147	10.0671
						148	10.0671
						148	0
						148	10.0671
						147.5	10.0671
						147.5	14.6412
						146.75	14.6412
						146.75	19.1155
						145.25	19.1155
						145.25	53.3038
						151.25	53.3038
						151.25	28.2005
						149.75	28.2005
						149.75	7.49438
						149	7.49438
						149	0
						149	7.49438
						150.5	7.49438
						150.5	3.08516
						150	3.08516
						150	0
						150	3.08516
						151	3.08516
						151	0
						151	3.08516
						150.5	3.08516
						150.5	7.49438
						149.75	7.49438
						149.75	28.2005
						152.75	28.2005
						152.75	11.1049
						152	11.1049
						152	0
						152	11.1049
						153.5	11.1049
						153.5	3.6979
						153	3.6979
						153	0
						153	3.6979
						154	3.6979
						154	0
						154	3.6979
						153.5	3.6979
						153.5	11.1049
						152.75	11.1049
						152.75	28.2005
						151.25	28.2005
						151.25	53.3038
						148.25	53.3038
						148.25	137.308
						162.25	137.308
						162.25	65.59
						156.625	65.59
						156.625	29.0908
						155.5	29.0908
						155.5	6.87424
						155	6.87424
						155	0
						155	6.87424
						156	6.87424
						156	0
						156	6.87424
						155.5	6.87424
						155.5	29.0908
						157.75	29.0908
						157.75	15.2305
						157	15.2305
						157	0
						157	15.2305
						158.5	15.2305
						158.5	2.55611
						158	2.55611
						158	0
						158	2.55611
						159	2.55611
						159	0
						159	2.55611
						158.5	2.55611
						158.5	15.2305
						157.75	15.2305
						157.75	29.0908
						156.625	29.0908
						156.625	65.59
						167.875	65.59
						167.875	59.6598
						163.562	59.6598
						163.562	15.6814
						161.5	15.6814
						161.5	8.25429
						160.5	8.25429
						160.5	2.31477
						160	2.31477
						160	0
						160	2.31477
						161	2.31477
						161	0
						161	2.31477
						160.5	2.31477
						160.5	8.25429
						162.5	8.25429
						162.5	3.56779
						162	3.56779
						162	0
						162	3.56779
						163	3.56779
						163	0
						163	3.56779
						162.5	3.56779
						162.5	8.25429
						161.5	8.25429
						161.5	15.6814
						165.625	15.6814
						165.625	11.2478
						164.5	11.2478
						164.5	7.73687
						164	7.73687
						164	0
						164	7.73687
						165	7.73687
						165	0
						165	7.73687
						164.5	7.73687
						164.5	11.2478
						166.75	11.2478
						166.75	8.87932
						166	8.87932
						166	0
						166	8.87932
						167.5	8.87932
						167.5	4.2487
						167	4.2487
						167	0
						167	4.2487
						168	4.2487
						168	0
						168	4.2487
						167.5	4.2487
						167.5	8.87932
						166.75	8.87932
						166.75	11.2478
						165.625	11.2478
						165.625	15.6814
						163.562	15.6814
						163.562	59.6598
						172.188	59.6598
						172.188	20.9541
						170.5	20.9541
						170.5	8.03455
						169.5	8.03455
						169.5	3.4217
						169	3.4217
						169	0
						169	3.4217
						170	3.4217
						170	0
						170	3.4217
						169.5	3.4217
						169.5	8.03455
						171.5	8.03455
						171.5	5.80178
						171	5.80178
						171	0
						171	5.80178
						172	5.80178
						172	0
						172	5.80178
						171.5	5.80178
						171.5	8.03455
						170.5	8.03455
						170.5	20.9541
						173.875	20.9541
						173.875	12.7425
						173	12.7425
						173	0
						173	12.7425
						174.75	12.7425
						174.75	6.08423
						174	6.08423
						174	0
						174	6.08423
						175.5	6.08423
						175.5	4.89591
						175	4.89591
						175	0
						175	4.89591
						176	4.89591
						176	0
						176	4.89591
						175.5	4.89591
						175.5	6.08423
						174.75	6.08423
						174.75	12.7425
						173.875	12.7425
						173.875	20.9541
						172.188	20.9541
						172.188	59.6598
						167.875	59.6598
						167.875	65.59
						162.25	65.59
						162.25	137.308
						155.25	137.308
						155.25	414.895
						198.994	414.895
						198.994	227.182
						188.113	227.182
						188.113	78.4211
						180.984	78.4211
						180.984	55.9309
						178.625	55.9309
						178.625	23.0192
						177.5	23.0192
						177.5	2.48308
						177	2.48308
						177	0
						177	2.48308
						178	2.48308
						178	0
						178	2.48308
						177.5	2.48308
						177.5	23.0192
						179.75	23.0192
						179.75	7.75103
						179	7.75103
						179	0
						179	7.75103
						180.5	7.75103
						180.5	5.75867
						180	5.75867
						180	0
						180	5.75867
						181	5.75867
						181	0
						181	5.75867
						180.5	5.75867
						180.5	7.75103
						179.75	7.75103
						179.75	23.0192
						178.625	23.0192
						178.625	55.9309
						183.344	55.9309
						183.344	26.4551
						182	26.4551
						182	0
						182	26.4551
						184.688	26.4551
						184.688	15.0881
						183.5	15.0881
						183.5	4.07766
						183	4.07766
						183	0
						183	4.07766
						184	4.07766
						184	0
						184	4.07766
						183.5	4.07766
						183.5	15.0881
						185.875	15.0881
						185.875	11.1104
						185	11.1104
						185	0
						185	11.1104
						186.75	11.1104
						186.75	7.31127
						186	7.31127
						186	0
						186	7.31127
						187.5	7.31127
						187.5	4.67399
						187	4.67399
						187	0
						187	4.67399
						188	4.67399
						188	0
						188	4.67399
						187.5	4.67399
						187.5	7.31127
						186.75	7.31127
						186.75	11.1104
						185.875	11.1104
						185.875	15.0881
						184.688	15.0881
						184.688	26.4551
						183.344	26.4551
						183.344	55.9309
						180.984	55.9309
						180.984	78.4211
						195.242	78.4211
						195.242	63.7625
						192.125	63.7625
						192.125	16.9559
						190.5	16.9559
						190.5	5.72382
						189.5	5.72382
						189.5	3.52549
						189	3.52549
						189	0
						189	3.52549
						190	3.52549
						190	0
						190	3.52549
						189.5	3.52549
						189.5	5.72382
						191.5	5.72382
						191.5	4.11236
						191	4.11236
						191	0
						191	4.11236
						192	4.11236
						192	0
						192	4.11236
						191.5	4.11236
						191.5	5.72382
						190.5	5.72382
						190.5	16.9559
						193.75	16.9559
						193.75	10.9344
						193	10.9344
						193	0
						193	10.9344
						194.5	10.9344
						194.5	2.35499
						194	2.35499
						194	0
						194	2.35499
						195	2.35499
						195	0
						195	2.35499
						194.5	2.35499
						194.5	10.9344
						193.75	10.9344
						193.75	16.9559
						192.125	16.9559
						192.125	63.7625
						198.359	63.7625
						198.359	41.0627
						196.75	41.0627
						196.75	7.83828
						196	7.83828
						196	0
						196	7.83828
						197.5	7.83828
						197.5	6.4003
						197	6.4003
						197	0
						197	6.4003
						198	6.4003
						198	0
						198	6.4003
						197.5	6.4003
						197.5	7.83828
						196.75	7.83828
						196.75	41.0627
						199.969	41.0627
						199.969	22.9523
						199	22.9523
						199	0
						199	22.9523
						200.938	22.9523
						200.938	14.7582
						200	14.7582
						200	0
						200	14.7582
						201.875	14.7582
						201.875	7.73056
						201	7.73056
						201	0
						201	7.73056
						202.75	7.73056
						202.75	5.86661
						202	5.86661
						202	0
						202	5.86661
						203.5	5.86661
						203.5	2.9004
						203	2.9004
						203	0
						203	2.9004
						204	2.9004
						204	0
						204	2.9004
						203.5	2.9004
						203.5	5.86661
						202.75	5.86661
						202.75	7.73056
						201.875	7.73056
						201.875	14.7582
						200.938	14.7582
						200.938	22.9523
						199.969	22.9523
						199.969	41.0627
						198.359	41.0627
						198.359	63.7625
						195.242	63.7625
						195.242	78.4211
						188.113	78.4211
						188.113	227.182
						209.875	227.182
						209.875	95.9122
						206.688	95.9122
						206.688	22.7635
						205.5	22.7635
						205.5	11.8763
						205	11.8763
						205	0
						205	11.8763
						206	11.8763
						206	0
						206	11.8763
						205.5	11.8763
						205.5	22.7635
						207.875	22.7635
						207.875	15.6095
						207	15.6095
						207	0
						207	15.6095
						208.75	15.6095
						208.75	10.4576
						208	10.4576
						208	0
						208	10.4576
						209.5	10.4576
						209.5	2.55554
						209	2.55554
						209	0
						209	2.55554
						210	2.55554
						210	0
						210	2.55554
						209.5	2.55554
						209.5	10.4576
						208.75	10.4576
						208.75	15.6095
						207.875	15.6095
						207.875	22.7635
						206.688	22.7635
						206.688	95.9122
						213.062	95.9122
						213.062	46.6696
						211.5	46.6696
						211.5	18.9772
						211	18.9772
						211	0
						211	18.9772
						212	18.9772
						212	0
						212	18.9772
						211.5	18.9772
						211.5	46.6696
						214.625	46.6696
						214.625	20.0149
						213.5	20.0149
						213.5	5.72432
						213	5.72432
						213	0
						213	5.72432
						214	5.72432
						214	0
						214	5.72432
						213.5	5.72432
						213.5	20.0149
						215.75	20.0149
						215.75	9.15676
						215	9.15676
						215	0
						215	9.15676
						216.5	9.15676
						216.5	6.21749
						216	6.21749
						216	0
						216	6.21749
						217	6.21749
						217	0
						217	6.21749
						216.5	6.21749
						216.5	9.15676
						215.75	9.15676
						215.75	20.0149
						214.625	20.0149
						214.625	46.6696
						213.062	46.6696
						213.062	95.9122
						209.875	95.9122
						209.875	227.182
						198.994	227.182
						198.994	414.895
						177.122	414.895
						177.122	453.264
						148.419	453.264
						148.419	1783.07
						97.7966	1783.07
						97.7966	12181.8
						327.852	12181.8
						327.852	2861.29
						243.805	2861.29
						243.805	831.043
						224.078	831.043
						224.078	170.518
						219.312	170.518
						219.312	27.4828
						218	27.4828
						218	0
						218	27.4828
						220.625	27.4828
						220.625	19.1197
						219.5	19.1197
						219.5	5.69988
						219	5.69988
						219	0
						219	5.69988
						220	5.69988
						220	0
						220	5.69988
						219.5	5.69988
						219.5	19.1197
						221.75	19.1197
						221.75	14.9906
						221	14.9906
						221	0
						221	14.9906
						222.5	14.9906
						222.5	10.6507
						222	10.6507
						222	0
						222	10.6507
						223	10.6507
						223	0
						223	10.6507
						222.5	10.6507
						222.5	14.9906
						221.75	14.9906
						221.75	19.1197
						220.625	19.1197
						220.625	27.4828
						219.312	27.4828
						219.312	170.518
						228.844	170.518
						228.844	54.3174
						225.688	54.3174
						225.688	32.8313
						224.5	32.8313
						224.5	9.23258
						224	9.23258
						224	0
						224	9.23258
						225	9.23258
						225	0
						225	9.23258
						224.5	9.23258
						224.5	32.8313
						226.875	32.8313
						226.875	13.1967
						226	13.1967
						226	0
						226	13.1967
						227.75	13.1967
						227.75	7.45612
						227	7.45612
						227	0
						227	7.45612
						228.5	7.45612
						228.5	6.19263
						228	6.19263
						228	0
						228	6.19263
						229	6.19263
						229	0
						229	6.19263
						228.5	6.19263
						228.5	7.45612
						227.75	7.45612
						227.75	13.1967
						226.875	13.1967
						226.875	32.8313
						225.688	32.8313
						225.688	54.3174
						232	54.3174
						232	32.9903
						230.5	32.9903
						230.5	9.28949
						230	9.28949
						230	0
						230	9.28949
						231	9.28949
						231	0
						231	9.28949
						230.5	9.28949
						230.5	32.9903
						233.5	32.9903
						233.5	16.6611
						232.5	16.6611
						232.5	9.43641
						232	9.43641
						232	0
						232	9.43641
						233	9.43641
						233	0
						233	9.43641
						232.5	9.43641
						232.5	16.6611
						234.5	16.6611
						234.5	11.9866
						234	11.9866
						234	0
						234	11.9866
						235	11.9866
						235	0
						235	11.9866
						234.5	11.9866
						234.5	16.6611
						233.5	16.6611
						233.5	32.9903
						232	32.9903
						232	54.3174
						228.844	54.3174
						228.844	170.518
						224.078	170.518
						224.078	831.043
						263.532	831.043
						263.532	380.505
						245.141	380.505
						245.141	139.296
						240.188	139.296
						240.188	45.8191
						237.5	45.8191
						237.5	8.58527
						236.5	8.58527
						236.5	3.54545
						236	3.54545
						236	0
						236	3.54545
						237	3.54545
						237	0
						237	3.54545
						236.5	3.54545
						236.5	8.58527
						238.5	8.58527
						238.5	3.70101
						238	3.70101
						238	0
						238	3.70101
						239	3.70101
						239	0
						239	3.70101
						238.5	3.70101
						238.5	8.58527
						237.5	8.58527
						237.5	45.8191
						242.875	45.8191
						242.875	39.779
						240.875	39.779
						240.875	10.4027
						240	10.4027
						240	0
						240	10.4027
						241.75	10.4027
						241.75	6.569
						241	6.569
						241	0
						241	6.569
						242.5	6.569
						242.5	0.547029
						242	0.547029
						242	0
						242	0.547029
						243	0.547029
						243	0
						243	0.547029
						242.5	0.547029
						242.5	6.569
						241.75	6.569
						241.75	10.4027
						240.875	10.4027
						240.875	39.779
						244.875	39.779
						244.875	21.0575
						244	21.0575
						244	0
						244	21.0575
						245.75	21.0575
						245.75	12.2846
						245	12.2846
						245	0
						245	12.2846
						246.5	12.2846
						246.5	4.935
						246	4.935
						246	0
						246	4.935
						247	4.935
						247	0
						247	4.935
						246.5	4.935
						246.5	12.2846
						245.75	12.2846
						245.75	21.0575
						244.875	21.0575
						244.875	39.779
						242.875	39.779
						242.875	45.8191
						240.188	45.8191
						240.188	139.296
						250.094	139.296
						250.094	48.4792
						248.5	48.4792
						248.5	7.71042
						248	7.71042
						248	0
						248	7.71042
						249	7.71042
						249	0
						249	7.71042
						248.5	7.71042
						248.5	48.4792
						251.688	48.4792
						251.688	16.6323
						250.5	16.6323
						250.5	6.9137
						250	6.9137
						250	0
						250	6.9137
						251	6.9137
						251	0
						251	6.9137
						250.5	6.9137
						250.5	16.6323
						252.875	16.6323
						252.875	9.51346
						252	9.51346
						252	0
						252	9.51346
						253.75	9.51346
						253.75	6.55665
						253	6.55665
						253	0
						253	6.55665
						254.5	6.55665
						254.5	3.52827
						254	3.52827
						254	0
						254	3.52827
						255	3.52827
						255	0
						255	3.52827
						254.5	3.52827
						254.5	6.55665
						253.75	6.55665
						253.75	9.51346
						252.875	9.51346
						252.875	16.6323
						251.688	16.6323
						251.688	48.4792
						250.094	48.4792
						250.094	139.296
						245.141	139.296
						245.141	380.505
						281.924	380.505
						281.924	261.782
						261.5	261.782
						261.5	65.2334
						258	65.2334
						258	22.7845
						256.5	22.7845
						256.5	7.60337
						256	7.60337
						256	0
						256	7.60337
						257	7.60337
						257	0
						257	7.60337
						256.5	7.60337
						256.5	22.7845
						259.5	22.7845
						259.5	10.6246
						258.5	10.6246
						258.5	3.7898
						258	3.7898
						258	0
						258	3.7898
						259	3.7898
						259	0
						259	3.7898
						258.5	3.7898
						258.5	10.6246
						260.5	10.6246
						260.5	5.15865
						260	5.15865
						260	0
						260	5.15865
						261	5.15865
						261	0
						261	5.15865
						260.5	5.15865
						260.5	10.6246
						259.5	10.6246
						259.5	22.7845
						258	22.7845
						258	65.2334
						265	65.2334
						265	32.1465
						262.875	32.1465
						262.875	13.9981
						262	13.9981
						262	0
						262	13.9981
						263.75	13.9981
						263.75	8.14378
						263	8.14378
						263	0
						263	8.14378
						264.5	8.14378
						264.5	2.09002
						264	2.09002
						264	0
						264	2.09002
						265	2.09002
						265	0
						265	2.09002
						264.5	2.09002
						264.5	8.14378
						263.75	8.14378
						263.75	13.9981
						262.875	13.9981
						262.875	32.1465
						267.125	32.1465
						267.125	26.2014
						266	26.2014
						266	0
						266	26.2014
						268.25	26.2014
						268.25	22.8379
						267	22.8379
						267	0
						267	22.8379
						269.5	22.8379
						269.5	17.6125
						268.5	17.6125
						268.5	3.2581
						268	3.2581
						268	0
						268	3.2581
						269	3.2581
						269	0
						269	3.2581
						268.5	3.2581
						268.5	17.6125
						270.5	17.6125
						270.5	8.23626
						270	8.23626
						270	0
						270	8.23626
						271	8.23626
						271	0
						271	8.23626
						270.5	8.23626
						270.5	17.6125
						269.5	17.6125
						269.5	22.8379
						268.25	22.8379
						268.25	26.2014
						267.125	26.2014
						267.125	32.1465
						265	32.1465
						265	65.2334
						261.5	65.2334
						261.5	261.782
						302.348	261.782
						302.348	204.876
						284.621	204.876
						284.621	104.64
						277.188	104.64
						277.188	31.8442
						274.25	31.8442
						274.25	15.5954
						272.75	15.5954
						272.75	6.19851
						272	6.19851
						272	0
						272	6.19851
						273.5	6.19851
						273.5	2.88636
						273	2.88636
						273	0
						273	2.88636
						274	2.88636
						274	0
						274	2.88636
						273.5	2.88636
						273.5	6.19851
						272.75	6.19851
						272.75	15.5954
						275.75	15.5954
						275.75	7.64739
						275	7.64739
						275	0
						275	7.64739
						276.5	7.64739
						276.5	5.56198
						276	5.56198
						276	0
						276	5.56198
						277	5.56198
						277	0
						277	5.56198
						276.5	5.56198
						276.5	7.64739
						275.75	7.64739
						275.75	15.5954
						274.25	15.5954
						274.25	31.8442
						280.125	31.8442
						280.125	26.3704
						278.75	26.3704
						278.75	9.19043
						278	9.19043
						278	0
						278	9.19043
						279.5	9.19043
						279.5	8.09927
						279	8.09927
						279	0
						279	8.09927
						280	8.09927
						280	0
						280	8.09927
						279.5	8.09927
						279.5	9.19043
						278.75	9.19043
						278.75	26.3704
						281.5	26.3704
						281.5	10.4667
						281	10.4667
						281	0
						281	10.4667
						282	10.4667
						282	0
						282	10.4667
						281.5	10.4667
						281.5	26.3704
						280.125	26.3704
						280.125	31.8442
						277.188	31.8442
						277.188	104.64
						292.055	104.64
						292.055	96.1
						286	96.1
						286	31.0379
						283.75	31.0379
						283.75	10.2122
						283	10.2122
						283	0
						283	10.2122
						284.5	10.2122
						284.5	5.11058
						284	5.11058
						284	0
						284	5.11058
						285	5.11058
						285	0
						285	5.11058
						284.5	5.11058
						284.5	10.2122
						283.75	10.2122
						283.75	31.0379
						288.25	31.0379
						288.25	14.7237
						286.75	14.7237
						286.75	4.40706
						286	4.40706
						286	0
						286	4.40706
						287.5	4.40706
						287.5	1.99551
						287	1.99551
						287	0
						287	1.99551
[truncated: 1,494 more rows]

## Sheet: Heat maps1_HID1
	S3891	S3895	S3931	combine1	S3918	S3892	S3906	combine3	S3927	S3947	combine2	S3919
Pcsk1	1	1	1	1	1	1	1	1	1	1	1	1
Ciao1	1	1	1	1	1	1	1	1	1	1	1	1
Scoc	1	1	1	1	1	1	1	1	1	1	1	1
Calr	1	1	1	1	1	1	1	1	1	1	1	1
Mettl7a1	1	1	1	1	1	1	1	1	1	1	1	1
Ccng1	1	1	1	1	1	1	1	1	1	1	1	1
Gpc6	1	1	1	1	1	1	1	1	1	1	1	1
Slc30a6	1	1	1	1	1	1	1	1	1	1	1	1
Eif5	1	1	1	1	1	1	1	1	1	1	1	1
Tmem273	1	1	1	1	1	1	1	1	1	1	1	1
Laptm4a	1	1	1	1	1	1	1	1	1	1	1	1
Sgk2	1	1	1	1	1	1	1	1	1	1	1	1
Frmd5	1	1	1	1	1	1	1	1	1	1	1	1
Ttc14	1	1	1	1	1	1	1	1	1	1	1	1
Tmed2	1	1	1	1	1	1	1	1	1	1	1	1
Ppa1	1	1	1	1	1	1	1	1	1	1	1	1
Gm5294	1	1	1	1	1	1	1	1	1	1	1	1
Slc25a3	1	1	1	1	1	1	1	1	1	1	1	1
Trappc2	1	1	1	1	1	1	1	1	1	1	1	1
Ear2	1	1	1	1	1	1	1	1	1	1	1	1
C1galt1c1	1	1	1	1	1	1	1	1	1	1	1	1
Platr26	1	1	1	1	1	1	1	1	1	1	1	1
Otoa	1	1	1	1	1	1	1	1	1	1	1	1
Arl6	1	1	1	1	1	1	1	1	1	1	1	1
Nox4	1	1	1	1	1	1	1	1	1	1	1	1
Hoxb7	1	1	1	1	1	1	1	1	1	1	1	1
Sgcd	1	1	1	1	1	1	1	1	1	1	1	1
Ift57	1	1	1	1	1	1	1	1	1	1	1	1
Ssb	1	1	1	1	1	1	1	1	1	1	1	1
Txn1	1	1	1	1	1	1	1	1	1	1	1	1
Zfp825	1	1	1	1	1	1	1	1	1	1	1	1
Gpx8	1	1	1	1	1	1	1	1	1	1	1	1
Sh3bgrl	1	1	1	1	1	1	1	1	1	1	1	1
Gm32856	1	1	1	1	1	1	1	1	1	1	1	1
Slc27a3	1	1	1	1	1	1	1	1	1	1	1	1
ccdc198	1	1	1	1	1	1	1	1	1	1	1	1
Osgepl1	1	1	1	1	1	1	1	1	1	1	1	1
Tmem17	1	1	1	1	1	1	1	1	1	1	1	1
Mir7b	1	1	1	1	1	1	1	1	1	1	1	1
Shisal2b	1	1	1	1	1	1	1	1	1	1	1	1
Hopx	1	1	1	1	1	1	1	1	1	1	1	1
Uba3	1	1	1	1	1	1	1	1	1	1	1	1
Gm38413	1	1	1	1	1	1	1	1	1	1	1	1
Slc25a20	1	1	1	1	1	1	1	1	1	1	1	1
Spc25	1	1	1	1	1	1	1	1	1	1	1	1
Yif1a	1	1	1	1	1	1	1	1	1	1	1	1
Mrpl49	1	1	1	1	1	1	1	1	1	1	1	1
Srp14	1	1	1	1	1	1	1	1	1	1	1	1
Psmd6	1	1	1	1	1	1	1	1	1	1	1	1
Atp5g1	1	1	1	1	1	1	1	1	1	1	1	1
Jagn1	1	1	1	1	1	1	1	1	1	1	1	1
Mcts1	1	1	1	1	1	1	1	1	1	1	1	1
Atg10	1	1	1	1	1	1	1	1	1	1	1	1
Riiad1	1	1	1	1	1	1	1	1	1	1	1	1
Zfp950	1	1	1	1	1	1	1	1	1	1	1	1
Zfp995	1	1	1	1	1	1	1	1	1	1	1	1
Rcbtb2	1	1	1	1	1	1	1	1	1	1	1	1
Prdx3	1	1	1	1	1	1	1	1	1	1	1	1
Fnta	1	1	1	1	1	1	1	1	1	1	1	1
Sccpdh	1	1	1	1	1	1	1	1	1	1	1	1
Srp9	1	1	1	1	1	1	1	1	1	1	1	1
Ccdc58	1	1	1	1	1	1	1	1	1	1	1	1
Mrps11	1	1	1	1	1	1	1	1	1	1	1	1
Malsu1	1	1	1	1	1	1	1	1	1	1	1	1
Eldr	1	1	1	1	1	1	1	1	1	1	1	1
Rheb	1	1	1	1	1	1	1	1	1	1	1	1
Zc3h7a	1	1	1	1	1	1	1	1	1	1	1	1
Farsa	1	1	1	1	1	1	1	1	1	1	1	1
Tra2b	1	1	1	1	1	1	1	1	1	1	1	1
Oser1	1	1	1	1	1	1	1	1	1	1	1	1
Ginm1	1	1	1	1	1	1	1	1	1	1	1	1
Hist1h1c	1	1	1	1	1	1	1	1	1	1	1	1
Zcchc17	1	1	1	1	1	1	1	1	1	1	1	1
Med9os	1	1	1	1	1	1	1	1	1	1	1	1
Apold1	1	1	1	1	1	1	1	1	1	1	1	1
Sra1	1	1	1	1	1	1	1	1	1	1	1	1
Ilkap	1	1	1	1	1	1	1	1	1	1	1	1
Psmc5	1	1	1	1	1	1	1	1	1	1	1	1
As3mt	1	1	1	1	1	1	1	1	1	1	1	1
Mkrn2os	1	1	1	1	1	1	1	1	1	1	1	1
Prmt7	1	1	1	1	1	1	1	1	1	1	1	1
Rabepk	1	1	1	1	1	1	1	1	1	1	1	1
Dynll1	1	1	1	1	1	1	1	1	1	1	1	1
Ddt	1	1	1	1	1	1	1	1	1	1	1	1
Mrpl34	1	1	1	1	1	1	1	1	1	1	1	1
Pfdn4	1	1	1	1	1	1	1	1	1	1	1	1
Abhd11	1	1	1	1	1	1	1	1	1	1	1	1
Dnajb9	1	1	1	1	1	1	1	1	1	1	1	1
Dad1	1	1	1	1	1	1	1	1	1	1	1	1
Mt3	1	1	1	1	1	1	1	1	1	1	1	1
Coq9	1	1	1	1	1	1	1	1	1	1	1	1
Nop16	1	1	1	1	1	1	1	1	1	1	1	1
Dcaf13	1	1	1	1	1	1	1	1	1	1	1	1
Edem2	1	1	1	1	1	1	1	1	1	1	1	1
Igsf5	1	1	1	1	1	1	1	1	1	1	1	1
Dctn6	1	1	1	1	1	1	1	1	1	1	1	1
Psmd7	1	1	1	1	1	1	1	1	1	1	1	1
Pqbp1	1	1	1	1	1	1	1	1	1	1	1	1
Nsfl1c	1	1	1	1	1	1	1	1	1	1	1	1
Pole3	1	1	1	1	1	1	1	1	1	1	1	1
Nsun4	1	1	1	1	1	1	1	1	1	1	1	1
Pdrg1	1	1	1	1	1	1	1	1	1	1	1	1
Rpp14	1	1	1	1	1	1	1	1	1	1	1	1
Slc25a4	1	1	1	1	1	1	1	1	1	1	1	1
Lrrc6	1	1	1	1	1	1	1	1	1	1	1	1
Tmed10	1	1	1	1	1	1	1	1	1	1	1	1
Cpox	1	1	1	1	1	1	1	1	1	1	1	1
Sec63	1	1	1	1	1	1	1	1	1	1	1	1
Zfp697	1	1	1	1	1	1	1	1	1	1	1	1
Fap	1	1	1	1	1	1	1	1	1	1	1	1
Ppp2r5c	1	1	1	1	1	1	1	1	1	1	1	1
Arl15	1	1	1	1	1	1	1	1	1	1	1	1
Moxd1	1	1	1	1	1	1	1	1	1	1	1	1
Uxs1	1	1	1	1	1	1	1	1	1	1	1	1
Hars	1	1	1	1	1	1	1	1	1	1	1	1
Cox18	1	1	1	1	1	1	1	1	1	1	1	1
Tgtp1	1	1	1	1	1	1	1	1	1	1	1	1
Slco2b1	1	1	1	1	1	1	1	1	1	1	1	1
Bsdc1	1	1	1	1	1	1	1	1	1	1	1	1
Plod3	1	1	1	1	1	1	1	1	1	1	1	1
Gnb5	1	1	1	1	1	1	1	1	1	1	1	1
Araf	1	1	1	1	1	1	1	1	1	1	1	1
Xbp1	1	1	1	1	1	1	1	1	1	1	1	1
Ccdc112	1	1	1	1	1	1	1	1	1	1	1	1
Scarf2	1	1	1	1	1	1	1	1	1	1	1	1
Cdkn1a	1	1	1	1	1	1	1	1	1	1	1	1
Slc18a1	1	1	1	1	1	1	1	1	1	1	1	1
Chac1	1	1	1	1	1	1	1	1	1	1	1	1
Map6	1	1	1	1	1	1	1	1	1	1	1	1
Eif4ebp1	1	1	1	1	1	1	1	1	1	1	1	1
Mrpl35	1	1	1	1	1	1	1	1	1	1	1	1
Bmp1	1	1	1	1	1	1	1	1	1	1	1	1
Lrrn2	1	1	1	1	1	1	1	1	1	1	1	1
Lrp8os3	1	1	1	1	1	1	1	1	1	1	1	1
Dnmt3b	1	1	1	1	1	1	1	1	1	1	1	1
Rnf182	1	1	1	1	1	1	1	1	1	1	1	1
Id4	1	1	1	1	1	1	1	1	1	1	1	1
Epb41l4a	1	1	1	1	1	1	1	1	1	1	1	1
Stard3	1	1	1	1	1	1	1	1	1	1	1	1
Sqor	1	1	1	1	1	1	1	1	1	1	1	1
Tmem255a	1	1	1	1	1	1	1	1	1	1	1	1
Amph	1	1	1	1	1	1	1	1	1	1	1	1
Dirc2	1	1	1	1	1	1	1	1	1	1	1	1
Zfp189	1	1	1	1	1	1	1	1	1	1	1	1
Rcbtb1	1	1	1	1	1	1	1	1	1	1	1	1
Rb1cc1	1	1	1	1	1	1	1	1	1	1	1	1
Cpeb2	1	1	1	1	1	1	1	1	1	1	1	1
Chst11	1	1	1	1	1	1	1	1	1	1	1	1
Lrrc57	1	1	1	1	1	1	1	1	1	1	1	1
Pros1	1	1	1	1	1	1	1	1	1	1	1	1
Il1rap	1	1	1	1	1	1	1	1	1	1	1	1
Cyb5r4	1	1	1	1	1	1	1	1	1	1	1	1
Phf10	1	1	1	1	1	1	1	1	1	1	1	1
Gusb	1	1	1	1	1	1	1	1	1	1	1	1
Asb6	1	1	1	1	1	1	1	1	1	1	1	1
Noct	1	1	1	1	1	1	1	1	1	1	1	1
Epcam	1	1	1	1	1	1	1	1	1	1	1	1
Rnft1	1	1	1	1	1	1	1	1	1	1	1	1
Pik3c2g	1	1	1	1	1	1	1	1	1	1	1	1
Snx6	1	1	1	1	1	1	1	1	1	1	1	1
Zbtb8os	1	1	1	1	1	1	1	1	1	1	1	1
Tsn	1	1	1	1	1	1	1	1	1	1	1	1
Rps6kb1	1	1	1	1	1	1	1	1	1	1	1	1
Crygn	1	1	1	1	1	1	1	1	1	1	1	1
Eif2s3y	1	1	1	1	1	1	1	1	1	1	1	1
Mterf4	1	1	1	1	1	1	1	1	1	1	1	1
Faim	1	1	1	1	1	1	1	1	1	1	1	1
Gm35025	1	1	1	1	1	1	1	1	1	1	1	1
Ephx4	1	1	1	1	1	1	1	1	1	1	1	1
Dnajc7	1	1	1	1	1	1	1	1	1	1	1	1
Pms1	1	1	1	1	1	1	1	1	1	1	1	1
Creg2	1	1	1	1	1	1	1	1	1	1	1	1
Klc4	1	1	1	1	1	1	1	1	1	1	1	1
Larp7	1	1	1	1	1	1	1	1	1	1	1	1
Lrrc27	1	1	1	1	1	1	1	1	1	1	1	1
Prelid1	1	1	1	1	1	1	1	1	1	1	1	1
Mmd	1	1	1	1	1	1	1	1	1	1	1	1
Znf41-ps	1	1	1	1	1	1	1	1	1	1	1	1
Mnx1	1	1	1	1	1	1	1	1	1	1	1	1
Nkapd1	1	1	1	1	1	1	1	1	1	1	1	1
Zfp715	1	1	1	1	1	1	1	1	1	1	1	1
Areg	1	1	1	1	1	1	1	1	1	1	1	1
Srsf11	1	1	1	1	1	1	1	1	1	1	1	1
Rcc1	1	1	1	1	1	1	1	1	1	1	1	1
Angptl7	1	1	1	1	1	1	1	1	1	1	1	1
Ubac1	1	1	1	1	1	1	1	1	1	1	1	1
Them4	1	1	1	1	1	1	1	1	1	1	1	1
Tfam	1	1	1	1	1	1	1	1	1	1	1	1
Coil	1	1	1	1	1	1	1	1	1	1	1	1
Retreg1	1	1	1	1	1	1	1	1	1	1	1	1
Tmub2	1	1	1	1	1	1	1	1	1	1	1	1
Yeats4	1	1	1	1	1	1	1	1	1	1	1	1
Cdc42	1	1	1	1	1	1	1	1	1	1	1	1
Rfc2	1	1	1	1	1	1	1	1	1	1	1	1
Cnrip1	1	1	1	1	1	1	1	1	1	1	1	1
Zwilch	1	1	1	1	1	1	1	1	1	1	1	1
Gcsh	1	1	1	1	1	1	1	1	1	1	1	1
Mzt2	1	1	1	1	1	1	1	1	1	1	1	1
Dnajb3	1	1	1	1	1	1	1	1	1	1	1	1
Dppa1	1	1	1	1	1	1	1	1	1	1	1	1
Sh3yl1	1	1	1	1	1	1	1	1	1	1	1	1
Ift81	1	1	1	1	1	1	1	1	1	1	1	1
Mrpl51	1	1	1	1	1	1	1	1	1	1	1	1
Ggact	1	1	1	1	1	1	1	1	1	1	1	1
Cisd3	1	1	1	1	1	1	1	1	1	1	1	1
Rpusd4	1	1	1	1	1	1	1	1	1	1	1	1
Chgb	1	1	1	1	1	1	1	1	1	1	1	1
Prepl	1	1	1	1	1	1	1	1	1	1	1	1
Grem2	1	1	1	1	1	1	1	1	1	1	1	1
Usp18	1	1	1	1	1	1	1	1	1	1	1	1
Il13ra1	1	1	1	1	1	1	1	1	1	1	1	1
Trpm1	1	1	1	1	1	1	1	1	1	1	1	1
Ivd	1	1	1	1	1	1	1	1	1	1	1	1
Ywhah	1	1	1	1	1	1	1	1	1	1	1	1
Spg7	1	1	1	1	1	1	1	1	1	1	1	1
Fam69a	1	1	1	1	1	1	1	1	1	1	1	1
Enox1	1	1	1	1	1	1	1	1	1	1	1	1
Fam163a	1	1	1	1	1	1	1	1	1	1	1	1
Lrrc38	1	1	1	1	1	1	1	1	1	1	1	1
Tmem117	1	1	1	1	1	1	1	1	1	1	1	1
Cdh7	1	1	1	1	1	1	1	1	1	1	1	1
Yae1d1	1	1	1	1	1	1	1	1	1	1	1	1
Aptx	1	1	1	1	1	1	1	1	1	1	1	1
Chpt1	1	1	1	1	1	1	1	1	1	1	1	1
Nckap1	1	1	1	1	1	1	1	1	1	1	1	1
Ap2a1	1	1	1	1	1	1	1	1	1	1	1	1
Mroh1	1	1	1	1	1	1	1	1	1	1	1	1
Wdr11	1	1	1	1	1	1	1	1	1	1	1	1
Atp2b2	1	1	1	1	1	1	1	1	1	1	1	1
Ap1b1	1	1	1	1	1	1	1	1	1	1	1	1
Slc39a6	1	1	1	1	1	1	1	1	1	1	1	1
Agl	1	1	1	1	1	1	1	1	1	1	1	1
Gns	1	1	1	1	1	1	1	1	1	1	1	1
Gga2	1	1	1	1	1	1	1	1	1	1	1	1
Magee1	1	1	1	1	1	1	1	1	1	1	1	1
Srebf1	1	1	1	1	1	1	1	1	1	1	1	1
Nbeal2	1	1	1	1	1	1	1	1	1	1	1	1
Ints1	1	1	1	1	1	1	1	1	1	1	1	1
Srebf2	1	1	1	1	1	1	1	1	1	1	1	1
Inppl1	1	1	1	1	1	1	1	1	1	1	1	1
Foxo1	1	1	1	1	1	1	1	1	1	1	1	1
Casz1	1	1	1	1	1	1	1	1	1	1	1	1
Tmem94	1	1	1	1	1	1	1	1	1	1	1	1
Ankrd6	1	1	1	1	1	1	1	1	1	1	1	1
Rbbp6	1	1	1	1	1	1	1	1	1	1	1	1
Hmgcr	1	1	1	1	1	1	1	1	1	1	1	1
Tnik	1	1	1	1	1	1	1	1	1	1	1	1
Plekhh2	1	1	1	1	1	1	1	1	1	1	1	1
Vps13d	1	1	1	1	1	1	1	1	1	1	1	1
Gigyf1	1	1	1	1	1	1	1	1	1	1	1	1
Wdr19	1	1	1	1	1	1	1	1	1	1	1	1
Hectd4	1	1	1	1	1	1	1	1	1	1	1	1
Rc3h2	1	1	1	1	1	1	1	1	1	1	1	1
Pum2	1	1	1	1	1	1	1	1	1	1	1	1
Nup214	1	1	1	1	1	1	1	1	1	1	1	1
Lyst	1	1	1	1	1	1	1	1	1	1	1	1
Lrig2	1	1	1	1	1	1	1	1	1	1	1	1
Serac1	1	1	1	1	1	1	1	1	1	1	1	1
Stard6	1	1	1	1	1	1	1	1	1	1	1	1
Zfp354a	1	1	1	1	1	1	1	1	1	1	1	1
Nmnat3	1	1	1	1	1	1	1	1	1	1	1	1
Mir670hg	1	1	1	1	1	1	1	1	1	1	1	1
Coq7	1	1	1	1	1	1	1	1	1	1	1	1
Asb11	1	1	1	1	1	1	1	1	1	1	1	1
Sycn	1	1	1	1	1	1	1	1	1	1	1	1
Carmil3	1	1	1	1	1	1	1	1	1	1	1	1
Trmt2b	1	1	1	1	1	1	1	1	1	1	1	1
Arxes1	1	1	1	1	1	1	1	1	1	1	1	1
Sft2d3	1	1	1	1	1	1	1	1	1	1	1	1
Nudt3	1	1	1	1	1	1	1	1	1	1	1	1
Rad51c	1	1	1	1	1	1	1	1	1	1	1	1
Csdc2	1	1	1	1	1	1	1	1	1	1	1	1
Kcnj11	1	1	1	1	1	1	1	1	1	1	1	1
Filip1	1	1	1	1	1	1	1	1	1	1	1	1
Camk2n1	1	1	1	1	1	1	1	1	1	1	1	1
Dynll2	1	1	1	1	1	1	1	1	1	1	1	1
Nt5c2	1	1	1	1	1	1	1	1	1	1	1	1
Phactr3	1	1	1	1	1	1	1	1	1	1	1	1
Rgs3	1	1	1	1	1	1	1	1	1	1	1	1
Bambi-ps1	1	1	1	1	1	1	1	1	1	1	1	1
Slc6a19	1	1	1	1	1	1	1	1	1	1	1	1
Radil	1	1	1	1	1	1	1	1	1	1	1	1
Atp4a	1	1	1	1	1	1	1	1	1	1	1	1
Kdm2b	1	1	1	1	1	1	1	1	1	1	1	1
Prob1	1	1	1	1	1	1	1	1	1	1	1	1
Satb1	1	1	1	1	1	1	1	1	1	1	1	1
Fzd7	1	1	1	1	1	1	1	1	1	1	1	1
Sez6l	1	1	1	1	1	1	1	1	1	1	1	1
Sult4a1	1	1	1	1	1	1	1	1	1	1	1	1
Frrs1l	1	1	1	1	1	1	1	1	1	1	1	1
Whrn	1	1	1	1	1	1	1	1	1	1	1	1
Atp2a2	1	1	1	1	1	1	1	1	1	1	1	1
Cntn1	1	1	1	1	1	1	1	1	1	1	1	1
Loxl2	1	1	1	1	1	1	1	1	1	1	1	1
Scg2	1	1	1	1	1	1	1	1	1	1	1	1
Pex5l	1	1	1	1	1	1	1	1	1	1	1	1
Rnf141	1	1	1	1	1	1	1	1	1	1	1	1
C1galt1	1	1	1	1	1	1	1	1	1	1	1	1
Tmem35a	1	1	1	1	1	1	1	1	1	1	1	1
Cabp7	1	1	1	1	1	1	1	1	1	1	1	1
Cntnap5b	1	1	1	1	1	1	1	1	1	1	1	1
Kcnh8	1	1	1	1	1	1	1	1	1	1	1	1
Sgpl1	1	1	1	1	1	1	1	1	1	1	1	1
Prkce	1	1	1	1	1	1	1	1	1	1	1	1
Nf1	1	1	1	1	1	1	1	1	1	1	1	1
Zswim5	1	1	1	1	1	1	1	1	1	1	1	1
Hivep3	1	1	1	1	1	1	1	1	1	1	1	1
Sox13	1	1	1	1	1	1	1	1	1	1	1	1
Tspan5	1	1	1	1	1	1	1	1	1	1	1	1
Zim1	1	1	1	1	1	1	1	1	1	1	1	1
Epha7	1	1	1	1	1	1	1	1	1	1	1	1
Phactr1	1	1	1	1	1	1	1	1	1	1	1	1
Cacna2d1	1	1	1	1	1	1	1	1	1	1	1	1
Mreg	1	1	1	1	1	1	1	1	1	1	1	1
Rspo4	1	1	1	1	1	1	1	1	1	1	1	1
Tmem229b	1	1	1	1	1	1	1	1	1	1	1	1
Cpe	1	1	1	1	1	1	1	1	1	1	1	1
Echdc1	1	1	1	1	1	1	1	1	1	1	1	1
Sfxn2	1	1	1	1	1	1	1	1	1	1	1	1
Sult1d1	1	1	1	1	1	1	1	1	1	1	1	1
Ppp1r1a	1	1	1	1	1	1	1	1	1	1	1	1
1500015A07Rik	1	1	1	1	1	1	1	1	1	1	1	1
Prrt1	1	1	1	1	1	1	1	1	1	1	1	1
Frs3	1	1	1	1	1	1	1	1	1	1	1	1
Slc29a4	1	1	1	1	1	1	1	1	1	1	1	1
2019-09-03	1	1	1	1	1	1	1	1	1	1	1	1
Rbfox3	1	1	1	1	1	1	1	1	1	1	1	1
Ube2cbp	1	1	1	1	1	1	1	1	1	1	1	1
Tmem163	1	1	1	1	1	1	1	1	1	1	1	1
Trpc4	1	1	1	1	1	1	1	1	1	1	1	1
Tspan12	1	1	1	1	1	1	1	1	1	1	1	1
Usp53	1	1	1	1	1	1	1	1	1	1	1	1
Pcyt1b	1	1	1	1	1	1	1	1	1	1	1	1
Crybb1	1	1	1	1	1	1	1	1	1	1	1	1
Mcoln3	1	1	1	1	1	1	1	1	1	1	1	1
Cda	1	1	1	1	1	1	1	1	1	1	1	1
Smc6	1	1	1	1	1	1	1	1	1	1	1	1
Coa7	1	1	1	1	1	1	1	1	1	1	1	1
Etv1	1	1	1	1	1	1	1	1	1	1	1	1
Mllt3	1	1	1	1	1	1	1	1	1	1	1	1
Etv5	1	1	1	1	1	1	1	1	1	1	1	1
Rlim	1	1	1	1	1	1	1	1	1	1	1	1
Thumpd1	1	1	1	1	1	1	1	1	1	1	1	1
Mapk14	1	1	1	1	1	1	1	1	1	1	1	1
Cemip2	1	1	1	1	1	1	1	1	1	1	1	1
Yars	1	1	1	1	1	1	1	1	1	1	1	1
Ssbp3	1	1	1	1	1	1	1	1	1	1	1	1
Cbll1	1	1	1	1	1	1	1	1	1	1	1	1
Morn4	1	1	1	1	1	1	1	1	1	1	1	1
Galnt14	1	1	1	1	1	1	1	1	1	1	1	1
Acin1	1	1	1	1	1	1	1	1	1	1	1	1
Trpm2	1	1	1	1	1	1	1	1	1	1	1	1
Pkm	1	1	1	1	1	1	1	1	1	1	1	1
Klhl22	1	1	1	1	1	1	1	1	1	1	1	1
Snapc2	1	1	1	1	1	1	1	1	1	1	1	1
Zmynd19	1	1	1	1	1	1	1	1	1	1	1	1
Pgm1	1	1	1	1	1	1	1	1	1	1	1	1
Copg1	1	1	1	1	1	1	1	1	1	1	1	1
Clip1	1	1	1	1	1	1	1	1	1	1	1	1
Gna12	1	1	1	1	1	1	1	1	1	1	1	1
Prkaca	1	1	1	1	1	1	1	1	1	1	1	1
Uck2	1	1	1	1	1	1	1	1	1	1	1	1
Senp2	1	1	1	1	1	1	1	1	1	1	1	1
Nploc4	1	1	1	1	1	1	1	1	1	1	1	1
Bcl2l13	1	1	1	1	1	1	1	1	1	1	1	1
Men1	1	1	1	1	1	1	1	1	1	1	1	1
Gaa	1	1	1	1	1	1	1	1	1	1	1	1
Pde4dip	1	1	1	1	1	1	1	1	1	1	1	1
Got1	1	1	1	1	1	1	1	1	1	1	1	1
Rprd1b	1	1	1	1	1	1	1	1	1	1	1	1
Tbcd	1	1	1	1	1	1	1	1	1	1	1	1
Ptpn11	1	1	1	1	1	1	1	1	1	1	1	1
Golga5	1	1	1	1	1	1	1	1	1	1	1	1
Neu1	1	1	1	1	1	1	1	1	1	1	1	1
Spata5l1	1	1	1	1	1	1	1	1	1	1	1	1
Ube2r2	1	1	1	1	1	1	1	1	1	1	1	1
Cd274	1	1	1	1	1	1	1	1	1	1	1	1
Nr4a3	1	1	1	1	1	1	1	1	1	1	1	1
Nr1d1	1	1	1	1	1	1	1	1	1	1	1	1
Samd1	1	1	1	1	1	1	1	1	1	1	1	1
Pcyt2	1	1	1	1	1	1	1	1	1	1	1	1
Smarca5	1	1	1	1	1	1	1	1	1	1	1	1
Sf3b4	1	1	1	1	1	1	1	1	1	1	1	1
Pigo	1	1	1	1	1	1	1	1	1	1	1	1
Rpp25	1	1	1	1	1	1	1	1	1	1	1	1
Rnf187	1	1	1	1	1	1	1	1	1	1	1	1
Ppfia3	1	1	1	1	1	1	1	1	1	1	1	1
Cep63	1	1	1	1	1	1	1	1	1	1	1	1
Calm3	1	1	1	1	1	1	1	1	1	1	1	1
Dgat2	1	1	1	1	1	1	1	1	1	1	1	1
Itih1	1	1	1	1	1	1	1	1	1	1	1	1
Gstk1	1	1	1	1	1	1	1	1	1	1	1	1
Acot4	1	1	1	1	1	1	1	1	1	1	1	1
Gga1	1	1	1	1	1	1	1	1	1	1	1	1
Acat2	1	1	1	1	1	1	1	1	1	1	1	1
Anapc5	1	1	1	1	1	1	1	1	1	1	1	1
Ppp6r2	1	1	1	1	1	1	1	1	1	1	1	1
Tbc1d22a	1	1	1	1	1	1	1	1	1	1	1	1
Poldip3	1	1	1	1	1	1	1	1	1	1	1	1
Galnt18	1	1	1	1	1	1	1	1	1	1	1	1
Itpkb	1	1	1	1	1	1	1	1	1	1	1	1
Stx6	1	1	1	1	1	1	1	1	1	1	1	1
Hdac2	1	1	1	1	1	1	1	1	1	1	1	1
Cacng7	1	1	1	1	1	1	1	1	1	1	1	1
Gpat4	1	1	1	1	1	1	1	1	1	1	1	1
Mkrn2	1	1	1	1	1	1	1	1	1	1	1	1
Pigs	1	1	1	1	1	1	1	1	1	1	1	1
Plekhg3	1	1	1	1	1	1	1	1	1	1	1	1
Rab10	1	1	1	1	1	1	1	1	1	1	1	1
Zfx	1	1	1	1	1	1	1	1	1	1	1	1
Dkk3	1	1	1	1	1	1	1	1	1	1	1	1
Topors	1	1	1	1	1	1	1	1	1	1	1	1
Rad23b	1	1	1	1	1	1	1	1	1	1	1	1
Wdr25	1	1	1	1	1	1	1	1	1	1	1	1
Hgf	1	1	1	1	1	1	1	1	1	1	1	1
Lamb1	1	1	1	1	1	1	1	1	1	1	1	1
Cygb	1	1	1	1	1	1	1	1	1	1	1	1
Hist3h2ba	1	1	1	1	1	1	1	1	1	1	1	1
Zfp707	1	1	1	1	1	1	1	1	1	1	1	1
Edn3	1	1	1	1	1	1	1	1	1	1	1	1
Dbpht2	1	1	1	1	1	1	1	1	1	1	1	1
Nyap1	1	1	1	1	1	1	1	1	1	1	1	1
Gtf3c5	1	1	1	1	1	1	1	1	1	1	1	1
Hcar2	1	1	1	1	1	1	1	1	1	1	1	1
Zfp810	1	1	1	1	1	1	1	1	1	1	1	1
Comp	1	1	1	1	1	1	1	1	1	1	1	1
Col23a1	1	1	1	1	1	1	1	1	1	1	1	1
Pcp4l1	1	1	1	1	1	1	1	1	1	1	1	1
Cdh13	1	1	1	1	1	1	1	1	1	1	1	1
Tmem88	1	1	1	1	1	1	1	1	1	1	1	1
Rbm20	1	1	1	1	1	1	1	1	1	1	1	1
Zfp959	1	1	1	1	1	1	1	1	1	1	1	1
A630089N07Rik	1	1	1	1	1	1	1	1	1	1	1	1
Ighv1-74	1	1	1	1	1	1	1	1	1	1	1	1
Wdr90	1	1	1	1	1	1	1	1	1	1	1	1
Rtf2	1	1	1	1	1	1	1	1	1	1	1	1
Polr3c	1	1	1	1	1	1	1	1	1	1	1	1
Cdc42se1	1	1	1	1	1	1	1	1	1	1	1	1
Mcm4	1	1	1	1	1	1	1	1	1	1	1	1
Timeless	1	1	1	1	1	1	1	1	1	1	1	1
Ercc8	1	1	1	1	1	1	1	1	1	1	1	1
Znrf3	1	1	1	1	1	1	1	1	1	1	1	1
Cep112	1	1	1	1	1	1	1	1	1	1	1	1
Cx3cl1	1	1	1	1	1	1	1	1	1	1	1	1
Skil	1	1	1	1	1	1	1	1	1	1	1	1
Trp53i11	1	1	1	1	1	1	1	1	1	1	1	1
Rara	1	1	1	1	1	1	1	1	1	1	1	1
Fiz1	1	1	1	1	1	1	1	1	1	1	1	1
Gramd4	1	1	1	1	1	1	1	1	1	1	1	1
Rad23a	1	1	1	1	1	1	1	1	1	1	1	1
Zdhhc18	1	1	1	1	1	1	1	1	1	1	1	1
Maml2	1	1	1	1	1	1	1	1	1	1	1	1
Sema4f	1	1	1	1	1	1	1	1	1	1	1	1
Ugt2b34	1	1	1	1	1	1	1	1	1	1	1	1
Cldn4	1	1	1	1	1	1	1	1	1	1	1	1
Nynrin	1	1	1	1	1	1	1	1	1	1	1	1
Mansc1	1	1	1	1	1	1	1	1	1	1	1	1
Zfp703	1	1	1	1	1	1	1	1	1	1	1	1
Tmie	1	1	1	1	1	1	1	1	1	1	1	1
Kcnn4	1	1	1	1	1	1	1	1	1	1	1	1
Tspan8	1	1	1	1	1	1	1	1	1	1	1	1
Col27a1	1	1	1	1	1	1	1	1	1	1	1	1

## Sheet: Heat maps_HID2
6	14923.4					191.802	11021.3
3	14923.4					76.6577	11021.3
3	3072.23					76.6577	1288.61
1.5	3072.23					30.2793	1288.61
1.5	819.47					30.2793	458.974
1	819.47					8.9375	458.974
1	0					8.9375	166.303
1	819.47					3.625	166.303
2	819.47					3.625	28.4771
2	0					1.75	28.4771
2	819.47					1.75	9.32826
1.5	819.47					1	9.32826
1.5	3072.23					1	0
4.5	3072.23					1	9.32826
4.5	2315.01					2.5	9.32826
3.5	2315.01					2.5	5.58356
3.5	1436.27					2	5.58356
3	1436.27					2	0
3	0					2	5.58356
3	1436.27					3	5.58356
4	1436.27					3	0
4	0					3	5.58356
4	1436.27					2.5	5.58356
3.5	1436.27					2.5	9.32826
3.5	2315.01					1.75	9.32826
5.5	2315.01					1.75	28.4771
5.5	1495.27					5.5	28.4771
5	1495.27					5.5	17.2273
5	0					4.5	17.2273
5	1495.27					4.5	4.27452
6	1495.27					4	4.27452
6	0					4	0
6	1495.27					4	4.27452
5.5	1495.27					5	4.27452
5.5	2315.01					5	0
4.5	2315.01					5	4.27452
4.5	3072.23					4.5	4.27452
3	3072.23					4.5	17.2273
3	14923.4					6.5	17.2273
9	14923.4					6.5	4.59706
9	9140.18					6	4.59706
7.5	9140.18					6	0
7.5	1590.86					6	4.59706
7	1590.86					7	4.59706
7	0					7	0
7	1590.86					7	4.59706
8	1590.86					6.5	4.59706
8	0					6.5	17.2273
8	1590.86					5.5	17.2273
7.5	1590.86					5.5	28.4771
7.5	9140.18					3.625	28.4771
10.5	9140.18					3.625	166.303
10.5	2754.68					14.25	166.303
9.5	2754.68					14.25	94.0184
9.5	1044.99					11.125	94.0184
9	1044.99					11.125	25.9075
9	0					9.5	25.9075
9	1044.99					9.5	8.71723
10	1044.99					8.5	8.71723
10	0					8.5	4.1475
10	1044.99					8	4.1475
9.5	1044.99					8	0
9.5	2754.68					8	4.1475
11.5	2754.68					9	4.1475
11.5	2041.62					9	0
11	2041.62					9	4.1475
11	0					8.5	4.1475
11	2041.62					8.5	8.71723
12	2041.62					10.5	8.71723
12	0					10.5	6.68759
12	2041.62					10	6.68759
11.5	2041.62					10	0
11.5	2754.68					10	6.68759
10.5	2754.68					11	6.68759
10.5	9140.18					11	0
9	9140.18					11	6.68759
9	14923.4					10.5	6.68759
6	14923.4					10.5	8.71723
						9.5	8.71723
						9.5	25.9075
						12.75	25.9075
						12.75	17.2273
						12	17.2273
						12	0
						12	17.2273
						13.5	17.2273
						13.5	4.76553
						13	4.76553
						13	0
						13	4.76553
						14	4.76553
						14	0
						14	4.76553
						13.5	4.76553
						13.5	17.2273
						12.75	17.2273
						12.75	25.9075
						11.125	25.9075
						11.125	94.0184
						17.375	94.0184
						17.375	46.0561
						15.5	46.0561
						15.5	9.38853
						15	9.38853
						15	0
						15	9.38853
						16	9.38853
						16	0
						16	9.38853
						15.5	9.38853
						15.5	46.0561
						19.25	46.0561
						19.25	17.1965
						17.75	17.1965
						17.75	6.7835
						17	6.7835
						17	0
						17	6.7835
						18.5	6.7835
						18.5	2.41697
						18	2.41697
						18	0
						18	2.41697
						19	2.41697
						19	0
						19	2.41697
						18.5	2.41697
						18.5	6.7835
						17.75	6.7835
						17.75	17.1965
						20.75	17.1965
						20.75	8.88088
						20	8.88088
						20	0
						20	8.88088
						21.5	8.88088
						21.5	3.70101
						21	3.70101
						21	0
						21	3.70101
						22	3.70101
						22	0
						22	3.70101
						21.5	3.70101
						21.5	8.88088
						20.75	8.88088
						20.75	17.1965
						19.25	17.1965
						19.25	46.0561
						17.375	46.0561
						17.375	94.0184
						14.25	94.0184
						14.25	166.303
						8.9375	166.303
						8.9375	458.974
						51.6211	458.974
						51.6211	285.066
						33.4766	285.066
						33.4766	107.206
						25.9375	107.206
						25.9375	30.4093
						23.75	30.4093
						23.75	8.98074
						23	8.98074
						23	0
						23	8.98074
						24.5	8.98074
						24.5	2.30682
						24	2.30682
						24	0
						24	2.30682
						25	2.30682
						25	0
						25	2.30682
						24.5	2.30682
						24.5	8.98074
						23.75	8.98074
						23.75	30.4093
						28.125	30.4093
						28.125	20.5423
						26.75	20.5423
						26.75	9.66264
						26	9.66264
						26	0
						26	9.66264
						27.5	9.66264
						27.5	4.90712
						27	4.90712
						27	0
						27	4.90712
						28	4.90712
						28	0
						28	4.90712
						27.5	4.90712
						27.5	9.66264
						26.75	9.66264
						26.75	20.5423
						29.5	20.5423
						29.5	12.4996
						29	12.4996
						29	0
						29	12.4996
						30	12.4996
						30	0
						30	12.4996
						29.5	12.4996
						29.5	20.5423
						28.125	20.5423
						28.125	30.4093
						25.9375	30.4093
						25.9375	107.206
						41.0156	107.206
						41.0156	73.5135
						35.0312	73.5135
						35.0312	31.1019
						31.875	31.1019
						31.875	11.0827
						31	11.0827
						31	0
						31	11.0827
						32.75	11.0827
						32.75	8.0362
						32	8.0362
						32	0
						32	8.0362
						33.5	8.0362
						33.5	2.23223
						33	2.23223
						33	0
						33	2.23223
						34	2.23223
						34	0
						34	2.23223
						33.5	2.23223
						33.5	8.0362
						32.75	8.0362
						32.75	11.0827
						31.875	11.0827
						31.875	31.1019
						38.1875	31.1019
						38.1875	23.7276
						35.875	23.7276
						35.875	13.5627
						35	13.5627
						35	0
						35	13.5627
						36.75	13.5627
						36.75	6.93489
						36	6.93489
						36	0
						36	6.93489
						37.5	6.93489
						37.5	1.77545
						37	1.77545
						37	0
						37	1.77545
						38	1.77545
						38	0
						38	1.77545
						37.5	1.77545
						37.5	6.93489
						36.75	6.93489
						36.75	13.5627
						35.875	13.5627
						35.875	23.7276
						40.5	23.7276
						40.5	18.7843
						39.5	18.7843
						39.5	7.10174
						39	7.10174
						39	0
						39	7.10174
						40	7.10174
						40	0
						40	7.10174
						39.5	7.10174
						39.5	18.7843
						41.5	18.7843
						41.5	9.40963
						41	9.40963
						41	0
						41	9.40963
						42	9.40963
						42	0
						42	9.40963
						41.5	9.40963
						41.5	18.7843
						40.5	18.7843
						40.5	23.7276
						38.1875	23.7276
						38.1875	31.1019
						35.0312	31.1019
						35.0312	73.5135
						47	73.5135
						47	54.4155
						43.9375	54.4155
						43.9375	24.561
						43	24.561
						43	0
						43	24.561
						44.875	24.561
						44.875	9.54097
						44	9.54097
						44	0
						44	9.54097
						45.75	9.54097
						45.75	6.66897
						45	6.66897
						45	0
						45	6.66897
						46.5	6.66897
						46.5	2.38034
						46	2.38034
						46	0
						46	2.38034
						47	2.38034
						47	0
						47	2.38034
						46.5	2.38034
						46.5	6.66897
						45.75	6.66897
						45.75	9.54097
						44.875	9.54097
						44.875	24.561
						43.9375	24.561
						43.9375	54.4155
						50.0625	54.4155
						50.0625	31.2898
						48.5	31.2898
						48.5	8.99376
						48	8.99376
						48	0
						48	8.99376
						49	8.99376
						49	0
						49	8.99376
						48.5	8.99376
						48.5	31.2898
						51.625	31.2898
						51.625	17.0051
						50.5	17.0051
						50.5	6.41851
						50	6.41851
						50	0
						50	6.41851
						51	6.41851
						51	0
						51	6.41851
						50.5	6.41851
						50.5	17.0051
						52.75	17.0051
						52.75	8.07575
						52	8.07575
						52	0
						52	8.07575
						53.5	8.07575
						53.5	1.7601
						53	1.7601
						53	0
						53	1.7601
						54	1.7601
						54	0
						54	1.7601
						53.5	1.7601
						53.5	8.07575
						52.75	8.07575
						52.75	17.0051
						51.625	17.0051
						51.625	31.2898
						50.0625	31.2898
						50.0625	54.4155
						47	54.4155
						47	73.5135
						41.0156	73.5135
						41.0156	107.206
						33.4766	107.206
						33.4766	285.066
						69.7656	285.066
						69.7656	193.716
						60.3438	193.716
						60.3438	57.3529
						56.5	57.3529
						56.5	16.3632
						55.5	16.3632
						55.5	3.72538
						55	3.72538
						55	0
						55	3.72538
						56	3.72538
						56	0
						56	3.72538
						55.5	3.72538
						55.5	16.3632
						57.5	16.3632
						57.5	12.0989
						57	12.0989
						57	0
						57	12.0989
						58	12.0989
						58	0
						58	12.0989
						57.5	12.0989
						57.5	16.3632
						56.5	16.3632
						56.5	57.3529
						64.1875	57.3529
						64.1875	32.8047
						61.25	32.8047
						61.25	12.2876
						59.75	12.2876
						59.75	6.59691
						59	6.59691
						59	0
						59	6.59691
						60.5	6.59691
						60.5	3.52077
						60	3.52077
						60	0
						60	3.52077
						61	3.52077
						61	0
						61	3.52077
						60.5	3.52077
						60.5	6.59691
						59.75	6.59691
						59.75	12.2876
						62.75	12.2876
						62.75	8.10216
						62	8.10216
						62	0
						62	8.10216
						63.5	8.10216
						63.5	4.91276
						63	4.91276
						63	0
						63	4.91276
						64	4.91276
						64	0
						64	4.91276
						63.5	4.91276
						63.5	8.10216
						62.75	8.10216
						62.75	12.2876
						61.25	12.2876
						61.25	32.8047
						67.125	32.8047
						67.125	19.9746
						65.75	19.9746
						65.75	9.22264
						65	9.22264
						65	0
						65	9.22264
						66.5	9.22264
						66.5	2.90365
						66	2.90365
						66	0
						66	2.90365
						67	2.90365
						67	0
						67	2.90365
						66.5	2.90365
						66.5	9.22264
						65.75	9.22264
						65.75	19.9746
						68.5	19.9746
						68.5	11.1653
						68	11.1653
						68	0
						68	11.1653
						69	11.1653
						69	0
						69	11.1653
						68.5	11.1653
						68.5	19.9746
						67.125	19.9746
						67.125	32.8047
						64.1875	32.8047
						64.1875	57.3529
						60.3438	57.3529
						60.3438	193.716
						79.1875	193.716
						79.1875	92.924
						72.5938	92.924
						72.5938	26.5445
						70.5	26.5445
						70.5	4.09825
						70	4.09825
						70	0
						70	4.09825
						71	4.09825
						71	0
						71	4.09825
						70.5	4.09825
						70.5	26.5445
						74.6875	26.5445
						74.6875	14.9447
						72.75	14.9447
						72.75	7.63509
						72	7.63509
						72	0
						72	7.63509
						73.5	7.63509
						73.5	1.69777
						73	1.69777
						73	0
						73	1.69777
						74	1.69777
						74	0
						74	1.69777
						73.5	1.69777
						73.5	7.63509
						72.75	7.63509
						72.75	14.9447
						76.625	14.9447
						76.625	10.6614
						75.5	10.6614
						75.5	5.79139
						75	5.79139
						75	0
						75	5.79139
						76	5.79139
						76	0
						76	5.79139
						75.5	5.79139
						75.5	10.6614
						77.75	10.6614
						77.75	6.07083
						77	6.07083
						77	0
						77	6.07083
						78.5	6.07083
						78.5	3.39336
						78	3.39336
						78	0
						78	3.39336
						79	3.39336
						79	0
						79	3.39336
						78.5	3.39336
						78.5	6.07083
						77.75	6.07083
						77.75	10.6614
						76.625	10.6614
						76.625	14.9447
						74.6875	14.9447
						74.6875	26.5445
						72.5938	26.5445
						72.5938	92.924
						85.7812	92.924
						85.7812	41.3117
						82.6875	41.3117
						82.6875	13.9623
						80.875	13.9623
						80.875	6.03208
						80	6.03208
						80	0
						80	6.03208
						81.75	6.03208
						81.75	4.9987
						81	4.9987
						81	0
						81	4.9987
						82.5	4.9987
						82.5	3.5435
						82	3.5435
						82	0
						82	3.5435
						83	3.5435
						83	0
						83	3.5435
						82.5	3.5435
						82.5	4.9987
						81.75	4.9987
						81.75	6.03208
						80.875	6.03208
						80.875	13.9623
						84.5	13.9623
						84.5	6.65901
						84	6.65901
						84	0
						84	6.65901
						85	6.65901
						85	0
						85	6.65901
						84.5	6.65901
						84.5	13.9623
						82.6875	13.9623
						82.6875	41.3117
						88.875	41.3117
						88.875	28.3725
						86.875	28.3725
						86.875	12.8098
						86	12.8098
						86	0
						86	12.8098
						87.75	12.8098
						87.75	8.42128
						87	8.42128
						87	0
						87	8.42128
						88.5	8.42128
						88.5	3.77949
						88	3.77949
						88	0
						88	3.77949
						89	3.77949
						89	0
						89	3.77949
						88.5	3.77949
						88.5	8.42128
						87.75	8.42128
						87.75	12.8098
						86.875	12.8098
						86.875	28.3725
						90.875	28.3725
						90.875	15.7017
						90	15.7017
						90	0
						90	15.7017
						91.75	15.7017
						91.75	8.72398
						91	8.72398
						91	0
						91	8.72398
						92.5	8.72398
						92.5	6.3493
						92	6.3493
						92	0
						92	6.3493
						93	6.3493
						93	0
						93	6.3493
						92.5	6.3493
						92.5	8.72398
						91.75	8.72398
						91.75	15.7017
						90.875	15.7017
						90.875	28.3725
						88.875	28.3725
						88.875	41.3117
						85.7812	41.3117
						85.7812	92.924
						79.1875	92.924
						79.1875	193.716
						69.7656	193.716
						69.7656	285.066
						51.6211	285.066
						51.6211	458.974
						30.2793	458.974
						30.2793	1288.61
						123.036	1288.61
						123.036	798.014
						102.055	798.014
						102.055	150.745
						95.625	150.745
						95.625	38.0637
						94.5	38.0637
						94.5	10.7246
						94	10.7246
						94	0
						94	10.7246
						95	10.7246
						95	0
						95	10.7246
						94.5	10.7246
						94.5	38.0637
						96.75	38.0637
						96.75	20.1324
						96	20.1324
						96	0
						96	20.1324
						97.5	20.1324
						97.5	14.9533
						97	14.9533
						97	0
						97	14.9533
						98	14.9533
						98	0
						98	14.9533
						97.5	14.9533
						97.5	20.1324
						96.75	20.1324
						96.75	38.0637
						95.625	38.0637
						95.625	150.745
						108.484	150.745
						108.484	45.5978
						103.812	45.5978
						103.812	27.6024
						100.875	27.6024
						100.875	8.91713
						99.5	8.91713
						99.5	2.03681
						99	2.03681
						99	0
						99	2.03681
						100	2.03681
						100	0
						100	2.03681
						99.5	2.03681
						99.5	8.91713
						102.25	8.91713
						102.25	4.67858
						101	4.67858
						101	0
						101	4.67858
						103.5	4.67858
						103.5	3.43927
						102.5	3.43927
						102.5	1.19045
						102	1.19045
						102	0
						102	1.19045
						103	1.19045
						103	0
						103	1.19045
						102.5	1.19045
						102.5	3.43927
						104.5	3.43927
						104.5	1.93042
						104	1.93042
						104	0
						104	1.93042
						105	1.93042
						105	0
						105	1.93042
						104.5	1.93042
						104.5	3.43927
						103.5	3.43927
						103.5	4.67858
						102.25	4.67858
						102.25	8.91713
						100.875	8.91713
						100.875	27.6024
						106.75	27.6024
						106.75	9.21231
						106	9.21231
						106	0
						106	9.21231
						107.5	9.21231
						107.5	6.16182
						107	6.16182
						107	0
						107	6.16182
						108	6.16182
						108	0
						108	6.16182
						107.5	6.16182
						107.5	9.21231
						106.75	9.21231
						106.75	27.6024
						103.812	27.6024
						103.812	45.5978
						113.156	45.5978
						113.156	44.0899
						110.5	44.0899
						110.5	13.3754
						109.5	13.3754
						109.5	5.33733
						109	5.33733
						109	0
						109	5.33733
						110	5.33733
						110	0
						110	5.33733
						109.5	5.33733
						109.5	13.3754
						111.5	13.3754
						111.5	9.12961
						111	9.12961
						111	0
						111	9.12961
						112	9.12961
						112	0
						112	9.12961
						111.5	9.12961
						111.5	13.3754
						110.5	13.3754
						110.5	44.0899
						115.812	44.0899
						115.812	25.0212
						113.875	25.0212
						113.875	10.9975
						113	10.9975
						113	0
						113	10.9975
						114.75	10.9975
						114.75	3.1549
						114	3.1549
						114	0
						114	3.1549
						115.5	3.1549
						115.5	0.916392
						115	0.916392
						115	0
						115	0.916392
						116	0.916392
						116	0
						116	0.916392
						115.5	0.916392
						115.5	3.1549
						114.75	3.1549
						114.75	10.9975
						113.875	10.9975
						113.875	25.0212
						117.75	25.0212
						117.75	18.8185
						117	18.8185
						117	0
						117	18.8185
						118.5	18.8185
						118.5	5.68233
						118	5.68233
						118	0
						118	5.68233
						119	5.68233
						119	0
						119	5.68233
						118.5	5.68233
						118.5	18.8185
						117.75	18.8185
						117.75	25.0212
						115.812	25.0212
						115.812	44.0899
						113.156	44.0899
						113.156	45.5978
						108.484	45.5978
						108.484	150.745
						102.055	150.745
						102.055	798.014
						144.018	798.014
						144.018	304.515
						125.852	304.515
						125.852	121.115
						121.5	121.115
						121.5	21.9609
						120.5	21.9609
						120.5	3.59531
						120	3.59531
						120	0
						120	3.59531
						121	3.59531
						121	0
						121	3.59531
						120.5	3.59531
						120.5	21.9609
						122.5	21.9609
						122.5	6.72057
						122	6.72057
						122	0
						122	6.72057
						123	6.72057
						123	0
						123	6.72057
						122.5	6.72057
						122.5	21.9609
						121.5	21.9609
						121.5	121.115
						130.203	121.115
						130.203	38.9478
						126.094	38.9478
						126.094	17.3455
						124.5	17.3455
						124.5	4.19679
						124	4.19679
						124	0
						124	4.19679
						125	4.19679
						125	0
						125	4.19679
						124.5	4.19679
						124.5	17.3455
						127.688	17.3455
						127.688	12.3738
						126.5	12.3738
						126.5	5.26602
						126	5.26602
						126	0
						126	5.26602
						127	5.26602
						127	0
						127	5.26602
						126.5	5.26602
						126.5	12.3738
						128.875	12.3738
						128.875	10.1188
						128	10.1188
						128	0
						128	10.1188
						129.75	10.1188
						129.75	3.98411
						129	3.98411
						129	0
						129	3.98411
						130.5	3.98411
						130.5	1.95232
						130	1.95232
						130	0
						130	1.95232
						131	1.95232
						131	0
						131	1.95232
						130.5	1.95232
						130.5	3.98411
						129.75	3.98411
						129.75	10.1188
						128.875	10.1188
						128.875	12.3738
						127.688	12.3738
						127.688	17.3455
						126.094	17.3455
						126.094	38.9478
						134.312	38.9478
						134.312	27.4141
						132.75	27.4141
						132.75	9.30383
						132	9.30383
						132	0
						132	9.30383
						133.5	9.30383
						133.5	4.93415
						133	4.93415
						133	0
						133	4.93415
						134	4.93415
						134	0
						134	4.93415
						133.5	4.93415
						133.5	9.30383
						132.75	9.30383
						132.75	27.4141
						135.875	27.4141
						135.875	12.1642
						135	12.1642
						135	0
						135	12.1642
						136.75	12.1642
						136.75	4.44068
						136	4.44068
						136	0
						136	4.44068
						137.5	4.44068
						137.5	3.30404
						137	3.30404
						137	0
						137	3.30404
						138	3.30404
						138	0
						138	3.30404
						137.5	3.30404
						137.5	4.44068
						136.75	4.44068
						136.75	12.1642
						135.875	12.1642
						135.875	27.4141
						134.312	27.4141
						134.312	38.9478
						130.203	38.9478
						130.203	121.115
						125.852	121.115
						125.852	304.515
						162.184	304.515
						162.184	266.185
						150.094	266.185
						150.094	156.918
						144.344	156.918
						144.344	39.7175
						141.062	39.7175
						141.062	20.1674
						139.5	20.1674
						139.5	9.51272
						139	9.51272
						139	0
						139	9.51272
						140	9.51272
						140	0
						140	9.51272
						139.5	9.51272
						139.5	20.1674
						142.625	20.1674
						142.625	10.2678
						141.5	10.2678
						141.5	2.53576
						141	2.53576
						141	0
						141	2.53576
						142	2.53576
						142	0
						142	2.53576
						141.5	2.53576
						141.5	10.2678
						143.75	10.2678
						143.75	6.54719
						143	6.54719
						143	0
						143	6.54719
						144.5	6.54719
						144.5	4.36158
						144	4.36158
						144	0
						144	4.36158
						145	4.36158
						145	0
						145	4.36158
						144.5	4.36158
						144.5	6.54719
						143.75	6.54719
						143.75	10.2678
						142.625	10.2678
						142.625	20.1674
						141.062	20.1674
						141.062	39.7175
						147.625	39.7175
						147.625	23.4217
						146.5	23.4217
						146.5	8.9278
						146	8.9278
						146	0
						146	8.9278
						147	8.9278
						147	0
						147	8.9278
						146.5	8.9278
						146.5	23.4217
						148.75	23.4217
						148.75	15.4722
						148	15.4722
						148	0
						148	15.4722
						149.5	15.4722
						149.5	1.41556
						149	1.41556
						149	0
						149	1.41556
						150	1.41556
						150	0
						150	1.41556
						149.5	1.41556
						149.5	15.4722
						148.75	15.4722
						148.75	23.4217
						147.625	23.4217
						147.625	39.7175
						144.344	39.7175
						144.344	156.918
						155.844	156.918
						155.844	49.2523
						153	49.2523
						153	15.9412
						151.5	15.9412
						151.5	8.88161
						151	8.88161
						151	0
						151	8.88161
						152	8.88161
						152	0
						152	8.88161
						151.5	8.88161
						151.5	15.9412
						154.5	15.9412
						154.5	10.0233
						153.5	10.0233
						153.5	6.43658
						153	6.43658
						153	0
						153	6.43658
						154	6.43658
						154	0
						154	6.43658
						153.5	6.43658
						153.5	10.0233
						155.5	10.0233
						155.5	7.69034
						155	7.69034
						155	0
						155	7.69034
						156	7.69034
						156	0
						156	7.69034
						155.5	7.69034
						155.5	10.0233
						154.5	10.0233
						154.5	15.9412
						153	15.9412
						153	49.2523
						158.688	49.2523
						158.688	19.2614
						157.5	19.2614
						157.5	6.87431
						157	6.87431
						157	0
						157	6.87431
						158	6.87431
						158	0
						158	6.87431
						157.5	6.87431
						157.5	19.2614
						159.875	19.2614
						159.875	10.0446
						159	10.0446
						159	0
						159	10.0446
						160.75	10.0446
						160.75	5.4835
						160	5.4835
						160	0
						160	5.4835
						161.5	5.4835
						161.5	2.70459
						161	2.70459
						161	0
						161	2.70459
						162	2.70459
						162	0
						162	2.70459
						161.5	2.70459
						161.5	5.4835
						160.75	5.4835
						160.75	10.0446
						159.875	10.0446
						159.875	19.2614
						158.688	19.2614
						158.688	49.2523
						155.844	49.2523
						155.844	156.918
						150.094	156.918
						150.094	266.185
						174.273	266.185
						174.273	159.444
						166.656	159.444
						166.656	37.5891
						163.75	37.5891
						163.75	7.75442
						163	7.75442
						163	0
						163	7.75442
						164.5	7.75442
						164.5	3.23541
						164	3.23541
						164	0
						164	3.23541
						165	3.23541
						165	0
						165	3.23541
						164.5	3.23541
						164.5	7.75442
						163.75	7.75442
						163.75	37.5891
						169.562	37.5891
						169.562	11.6473
						167.625	11.6473
						167.625	3.88702
						166.5	3.88702
						166.5	1.93907
						166	1.93907
						166	0
						166	1.93907
						167	1.93907
						167	0
						167	1.93907
						166.5	1.93907
						166.5	3.88702
						168.75	3.88702
						168.75	1.94819
						168	1.94819
						168	0
						168	1.94819
						169.5	1.94819
						169.5	1.10676
						169	1.10676
						169	0
						169	1.10676
						170	1.10676
						170	0
						170	1.10676
						169.5	1.10676
						169.5	1.94819
						168.75	1.94819
						168.75	3.88702
						167.625	3.88702
						167.625	11.6473
						171.5	11.6473
						171.5	6.61844
						171	6.61844
						171	0
						171	6.61844
						172	6.61844
						172	0
						172	6.61844
						171.5	6.61844
						171.5	11.6473
						169.562	11.6473
						169.562	37.5891
						166.656	37.5891
						166.656	159.444
						181.891	159.444
						181.891	56.671
						176.406	56.671
						176.406	20.5058
						174.5	20.5058
						174.5	7.45851
						173.5	7.45851
						173.5	1.33545
						173	1.33545
						173	0
						173	1.33545
						174	1.33545
						174	0
						174	1.33545
						173.5	1.33545
						173.5	7.45851
						175.5	7.45851
						175.5	2.33137
						175	2.33137
						175	0
						175	2.33137
						176	2.33137
						176	0
						176	2.33137
						175.5	2.33137
						175.5	7.45851
						174.5	7.45851
						174.5	20.5058
						178.312	20.5058
						178.312	8.80343
						177	8.80343
						177	0
						177	8.80343
						179.625	8.80343
						179.625	5.77715
						178.5	5.77715
						178.5	1.91725
						178	1.91725
						178	0
						178	1.91725
						179	1.91725
						179	0
						179	1.91725
						178.5	1.91725
						178.5	5.77715
						180.75	5.77715
						180.75	4.04809
						180	4.04809
						180	0
						180	4.04809
						181.5	4.04809
						181.5	1.80537
						181	1.80537
						181	0
						181	1.80537
						182	1.80537
						182	0
						182	1.80537
						181.5	1.80537
						181.5	4.04809
						180.75	4.04809
						180.75	5.77715
						179.625	5.77715
						179.625	8.80343
						178.312	8.80343
						178.312	20.5058
						176.406	20.5058
						176.406	56.671
						187.375	56.671
						187.375	33.0024
						185.25	33.0024
						185.25	9.11878
						183.75	9.11878
						183.75	3.10734
						183	3.10734
						183	0
						183	3.10734
						184.5	3.10734
						184.5	2.03327
						184	2.03327
						184	0
						184	2.03327
						185	2.03327
						185	0
						185	2.03327
						184.5	2.03327
						184.5	3.10734
						183.75	3.10734
						183.75	9.11878
						186.75	9.11878
						186.75	7.73565
						186	7.73565
						186	0
						186	7.73565
						187.5	7.73565
						187.5	4.86771
						187	4.86771
						187	0
						187	4.86771
						188	4.86771
						188	0
						188	4.86771
						187.5	4.86771
						187.5	7.73565
						186.75	7.73565
						186.75	9.11878
						185.25	9.11878
						185.25	33.0024
						189.5	33.0024
						189.5	16.4989
						189	16.4989
						189	0
						189	16.4989
						190	16.4989
						190	0
						190	16.4989
						189.5	16.4989
						189.5	33.0024
						187.375	33.0024
						187.375	56.671
						181.891	56.671
						181.891	159.444
						174.273	159.444
						174.273	266.185
						162.184	266.185
						162.184	304.515
						144.018	304.515
						144.018	798.014
						123.036	798.014
						123.036	1288.61
						76.6577	1288.61
						76.6577	11021.3
						306.946	11021.3
						306.946	4400.62
						239.158	4400.62
						239.158	660.482
						210.273	660.482
						210.273	238.17
						199.969	238.17
						199.969	66.85
						194.875	66.85
						194.875	24.2232
						192.5	24.2232
						192.5	11.5979
						191.5	11.5979
						191.5	5.9678
						191	5.9678
						191	0
						191	5.9678
						192	5.9678
						192	0
						192	5.9678
						191.5	5.9678
						191.5	11.5979
						193.5	11.5979
						193.5	8.71636
						193	8.71636
						193	0
						193	8.71636
						194	8.71636
						194	0
						194	8.71636
						193.5	8.71636
						193.5	11.5979
						192.5	11.5979
						192.5	24.2232
						197.25	24.2232
						197.25	20.6364
						195.75	20.6364
						195.75	10.0407
						195	10.0407
						195	0
						195	10.0407
						196.5	10.0407
						196.5	2.92679
						196	2.92679
						196	0
						196	2.92679
						197	2.92679
						197	0
						197	2.92679
						196.5	2.92679
						196.5	10.0407
						195.75	10.0407
						195.75	20.6364
						198.75	20.6364
						198.75	12.4734
						198	12.4734
						198	0
						198	12.4734
						199.5	12.4734
						199.5	5.45557
						199	5.45557
						199	0
						199	5.45557
						200	5.45557
						200	0
						200	5.45557
						199.5	5.45557
						199.5	12.4734
						198.75	12.4734
						198.75	20.6364
						197.25	20.6364
						197.25	24.2232
						194.875	24.2232
						194.875	66.85
						205.062	66.85
						205.062	44.3286
						202.5	44.3286
						202.5	12.3682
						201.5	12.3682
						201.5	5.76346
						201	5.76346
						201	0
						201	5.76346
						202	5.76346
						202	0
						202	5.76346
						201.5	5.76346
						201.5	12.3682
						203.5	12.3682
						203.5	6.43281
						203	6.43281
						203	0
						203	6.43281
						204	6.43281
						204	0
						204	6.43281
						203.5	6.43281
						203.5	12.3682
						202.5	12.3682
						202.5	44.3286
						207.625	44.3286
						207.625	22.8602
						205.75	22.8602
						205.75	12.6448
						205	12.6448
						205	0
						205	12.6448
						206.5	12.6448
						206.5	3.26518
						206	3.26518
						206	0
						206	3.26518
						207	3.26518
						207	0
						207	3.26518
						206.5	3.26518
						206.5	12.6448
						205.75	12.6448
						205.75	22.8602
						209.5	22.8602
						209.5	14.0417
						208.5	14.0417
						208.5	5.95922
						208	5.95922
						208	0
						208	5.95922
						209	5.95922
						209	0
						209	5.95922
						208.5	5.95922
						208.5	14.0417
						210.5	14.0417
						210.5	6.26343
						210	6.26343
						210	0
						210	6.26343
						211	6.26343
						211	0
						211	6.26343
						210.5	6.26343
						210.5	14.0417
						209.5	14.0417
						209.5	22.8602
						207.625	22.8602
						207.625	44.3286
						205.062	44.3286
						205.062	66.85
						199.969	66.85
						199.969	238.17
						220.578	238.17
						220.578	83.9219
						215.812	83.9219
						215.812	30.5567
						213.5	30.5567
						213.5	20.2274
						212.5	20.2274
						212.5	8.8539
						212	8.8539
						212	0
						212	8.8539
						213	8.8539
						213	0
						213	8.8539
						212.5	8.8539
						212.5	20.2274
						214.5	20.2274
						214.5	9.39343
						214	9.39343
						214	0
						214	9.39343
						215	9.39343
						215	0
						215	9.39343
						214.5	9.39343
						214.5	20.2274
						213.5	20.2274
						213.5	30.5567
						218.125	30.5567
						218.125	24.6893
						216.75	24.6893
						216.75	9.6343
						216	9.6343
						216	0
						216	9.6343
						217.5	9.6343
						217.5	2.40054
						217	2.40054
						217	0
						217	2.40054
						218	2.40054
						218	0
						218	2.40054
						217.5	2.40054
						217.5	9.6343
						216.75	9.6343
						216.75	24.6893
						219.5	24.6893
						219.5	14.7908
						219	14.7908
						219	0
						219	14.7908
						220	14.7908
						220	0
						220	14.7908
						219.5	14.7908
						219.5	24.6893
						218.125	24.6893
						218.125	30.5567
						215.812	30.5567
						215.812	83.9219
						225.344	83.9219
						225.344	58.4538
						222.5	58.4538
						222.5	36.3389
						221.5	36.3389
						221.5	7.48861
						221	7.48861
						221	0
						221	7.48861
						222	7.48861
						222	0
						222	7.48861
						221.5	7.48861
						221.5	36.3389
						223.5	36.3389
						223.5	19.5165
						223	19.5165
						223	0
						223	19.5165
						224	19.5165
						224	0
						224	19.5165
						223.5	19.5165
						223.5	36.3389
						222.5	36.3389
						222.5	58.4538
						228.188	58.4538
						228.188	56.5033
						225.875	56.5033
						225.875	18.0893
						225	18.0893
						225	0
						225	18.0893
						226.75	18.0893
						226.75	12.6481
						226	12.6481
						226	0
						226	12.6481
						227.5	12.6481
						227.5	9.15386
						227	9.15386
						227	0
						227	9.15386
						228	9.15386
						228	0
						228	9.15386
						227.5	9.15386
						227.5	12.6481
						226.75	12.6481
						226.75	18.0893
						225.875	18.0893
						225.875	56.5033
						230.5	56.5033
						230.5	34.0704
						229	34.0704
						229	0
						229	34.0704
						232	34.0704
						232	22.4682
						230.5	22.4682
						230.5	5.11254
						230	5.11254
						230	0
						230	5.11254
						231	5.11254
						231	0
						231	5.11254
						230.5	5.11254
						230.5	22.4682
						233.5	22.4682
						233.5	13.7439
						232.5	13.7439
						232.5	6.79704
						232	6.79704
						232	0
						232	6.79704
						233	6.79704
						233	0
						233	6.79704
						232.5	6.79704
						232.5	13.7439
						234.5	13.7439
						234.5	9.32027
						234	9.32027
						234	0
						234	9.32027
						235	9.32027
						235	0
						235	9.32027
						234.5	9.32027
						234.5	13.7439
						233.5	13.7439
						233.5	22.4682
						232	22.4682
						232	34.0704
						230.5	34.0704
						230.5	56.5033
						228.188	56.5033
						228.188	58.4538
						225.344	58.4538
						225.344	83.9219
						220.578	83.9219
						220.578	238.17
						210.273	238.17
						210.273	660.482
						268.043	660.482
						268.043	355.986
						251.414	355.986
						251.414	172.6
						243.062	172.6
						243.062	85.1145
						238.938	85.1145
						238.938	29.8617
						236.75	29.8617
						236.75	10.0861
						236	10.0861
						236	0
						236	10.0861
						237.5	10.0861
						237.5	2.28267
						237	2.28267
						237	0
						237	2.28267
						238	2.28267
						238	0
						238	2.28267
						237.5	2.28267
						237.5	10.0861
						236.75	10.0861
						236.75	29.8617
						241.125	29.8617
						241.125	21.1844
						239.75	21.1844
						239.75	6.62715
						239	6.62715
						239	0
						239	6.62715
						240.5	6.62715
						240.5	2.85975
						240	2.85975
						240	0
						240	2.85975
						241	2.85975
						241	0
						241	2.85975
						240.5	2.85975
						240.5	6.62715
						239.75	6.62715
						239.75	21.1844
						242.5	21.1844
						242.5	9.2773
						242	9.2773
						242	0
						242	9.2773
						243	9.2773
						243	0
						243	9.2773
						242.5	9.2773
						242.5	21.1844
						241.125	21.1844
						241.125	29.8617
						238.938	29.8617
						238.938	85.1145
						247.188	85.1145
						247.188	34.5083
						244.875	34.5083
						244.875	15.5997
						244	15.5997
						244	0
						244	15.5997
						245.75	15.5997
						245.75	11.2789
						245	11.2789
						245	0
						245	11.2789
						246.5	11.2789
						246.5	6.88592
						246	6.88592
						246	0
						246	6.88592
						247	6.88592
						247	0
						247	6.88592
						246.5	6.88592
						246.5	11.2789
						245.75	11.2789
						245.75	15.5997
						244.875	15.5997
						244.875	34.5083
						249.5	34.5083
						249.5	16.0276
						248.5	16.0276
						248.5	5.32734
						248	5.32734
						248	0
						248	5.32734
						249	5.32734
						249	0
						249	5.32734
						248.5	5.32734
						248.5	16.0276
						250.5	16.0276
						250.5	7.45413
						250	7.45413
						250	0
						250	7.45413
						251	7.45413
						251	0
						251	7.45413
						250.5	7.45413
						250.5	16.0276
						249.5	16.0276
						249.5	34.5083
						247.188	34.5083
						247.188	85.1145
						243.062	85.1145
						243.062	172.6
						259.766	172.6
						259.766	94.3773
						254.5	94.3773
						254.5	35.8482
						252.75	35.8482
						252.75	12.6224
						252	12.6224
						252	0
						252	12.6224
						253.5	12.6224
						253.5	10.9779
						253	10.9779
						253	0
						253	10.9779
						254	10.9779
						254	0
						254	10.9779
						253.5	10.9779
						253.5	12.6224
						252.75	12.6224
						252.75	35.8482
						256.25	35.8482
						256.25	23.0628
						255	23.0628
						255	0
						255	23.0628
						257.5	23.0628
						257.5	19.3837
						256.5	19.3837
						256.5	6.89566
						256	6.89566
						256	0
						256	6.89566
						257	6.89566
						257	0
						257	6.89566
						256.5	6.89566
						256.5	19.3837
						258.5	19.3837
						258.5	8.78917
						258	8.78917
						258	0
						258	8.78917
						259	8.78917
						259	0
						259	8.78917
						258.5	8.78917
						258.5	19.3837
						257.5	19.3837
						257.5	23.0628
						256.25	23.0628
						256.25	35.8482
						254.5	35.8482
						254.5	94.3773
						265.031	94.3773
						265.031	43.8446
						262.312	43.8446
						262.312	21.8145
						260.5	21.8145
						260.5	3.94294
						260	3.94294
						260	0
						260	3.94294
						261	3.94294
						261	0
						261	3.94294
						260.5	3.94294
						260.5	21.8145
						264.125	21.8145
						264.125	15.0864
						262.75	15.0864
						262.75	5.7351
						262	5.7351
						262	0
						262	5.7351
						263.5	5.7351
						263.5	2.85523
						263	2.85523
						263	0
						263	2.85523
						264	2.85523
						264	0
						264	2.85523
						263.5	2.85523
						263.5	5.7351
						262.75	5.7351
						262.75	15.0864
						265.5	15.0864
						265.5	6.59615
						265	6.59615
						265	0
						265	6.59615
						266	6.59615
						266	0
						266	6.59615
						265.5	6.59615
						265.5	15.0864
						264.125	15.0864
						264.125	21.8145
						262.312	21.8145
						262.312	43.8446
						267.75	43.8446
						267.75	22.1332
						267	22.1332
						267	0
						267	22.1332
						268.5	22.1332
						268.5	9.234
						268	9.234
						268	0
						268	9.234
						269	9.234
						269	0
						269	9.234
						268.5	9.234
						268.5	22.1332
						267.75	22.1332
						267.75	43.8446
						265.031	43.8446
						265.031	94.3773
						259.766	94.3773
						259.766	172.6
						251.414	172.6
						251.414	355.986
						284.672	355.986
						284.672	214.029
						275.062	214.029
						275.062	80.7669
						270.75	80.7669
						270.75	21.0477
						270	21.0477
						270	0
						270	21.0477
						271.5	21.0477
						271.5	11.8669
						271	11.8669
						271	0
						271	11.8669
						272	11.8669
						272	0
						272	11.8669
						271.5	11.8669
						271.5	21.0477
						270.75	21.0477
						270.75	80.7669
						279.375	80.7669
						279.375	53.6894
						275.062	53.6894
						275.062	21.2878
						273.5	21.2878
						273.5	10.373
						273	10.373
						273	0
						273	10.373
						274	10.373
						274	0
						274	10.373
						273.5	10.373
						273.5	21.2878
						276.625	21.2878
						276.625	13.4667
						275.5	13.4667
						275.5	3.5103
						275	3.5103
						275	0
						275	3.5103
						276	3.5103
						276	0
						276	3.5103
						275.5	3.5103
						275.5	13.4667
						277.75	13.4667
						277.75	9.22645
						277	9.22645
						277	0
						277	9.22645
						278.5	9.22645
						278.5	2.91802
						278	2.91802
						278	0
						278	2.91802
						279	2.91802
						279	0
						279	2.91802
						278.5	2.91802
						278.5	9.22645
						277.75	9.22645
						277.75	13.4667
						276.625	13.4667
						276.625	21.2878
						275.062	21.2878
						275.062	53.6894
						283.688	53.6894
						283.688	28.7988
						281.625	28.7988
						281.625	13.9813
						280.5	13.9813
						280.5	4.0081
						280	4.0081
						280	0
						280	4.0081
						281	4.0081
						281	0
						281	4.0081
						280.5	4.0081
						280.5	13.9813
						282.75	13.9813
						282.75	8.35056
						282	8.35056
						282	0
						282	8.35056
						283.5	8.35056
						283.5	5.36744
						283	5.36744
						283	0
						283	5.36744
						284	5.36744
						284	0
						284	5.36744
						283.5	5.36744
						283.5	8.35056
						282.75	8.35056
						282.75	13.9813
						281.625	13.9813
						281.625	28.7988
						285.75	28.7988
						285.75	22.5453
						285	22.5453
						285	0
						285	22.5453
						286.5	22.5453
						286.5	10.7862
						286	10.7862
						286	0
						286	10.7862
						287	10.7862
						287	0
						287	10.7862
						286.5	10.7862
						286.5	22.5453
						285.75	22.5453
						285.75	28.7988
						283.688	28.7988
						283.688	53.6894
						279.375	53.6894
						279.375	80.7669
[truncated: 1,494 more rows]

## Sheet: Heat maps_HID3
	S3891	S3895	S3931	combine1	S3918	S3892	S3906	combine3	S3927	S3947	combine2	S3919
Mir7b	1	1	1	1	1	1	1	1	1	1	1	1
Nmnat2	1	1	1	1	1	1	1	1	1	1	1	1
Sycn	1	1	1	1	1	1	1	1	1	1	1	1
Ttc39c	1	1	1	1	1	1	1	1	1	1	1	1
Tmem218	1	1	1	1	1	1	1	1	1	1	1	1
Enho	1	1	1	1	1	1	1	1	1	1	1	1
Rad51ap2	1	1	1	1	1	1	1	1	1	1	1	1
Nox4	1	1	1	1	1	1	1	1	1	1	1	1
Zfp954	1	1	1	1	1	1	1	1	1	1	1	1
Ppp1r42	1	1	1	1	1	1	1	1	1	1	1	1
A1cf	1	1	1	1	1	1	1	1	1	1	1	1
Cnot6l	1	1	1	1	1	1	1	1	1	1	1	1
Nectin3	1	1	1	1	1	1	1	1	1	1	1	1
Kcnh2	1	1	1	1	1	1	1	1	1	1	1	1
Kcnb1	1	1	1	1	1	1	1	1	1	1	1	1
Prkab2	1	1	1	1	1	1	1	1	1	1	1	1
Mreg	1	1	1	1	1	1	1	1	1	1	1	1
Ulk4	1	1	1	1	1	1	1	1	1	1	1	1
Bmi1	1	1	1	1	1	1	1	1	1	1	1	1
Arnt2	1	1	1	1	1	1	1	1	1	1	1	1
Erc2	1	1	1	1	1	1	1	1	1	1	1	1
Adgb	1	1	1	1	1	1	1	1	1	1	1	1
Tmed8	1	1	1	1	1	1	1	1	1	1	1	1
Slc35d3	1	1	1	1	1	1	1	1	1	1	1	1
Unc13a	1	1	1	1	1	1	1	1	1	1	1	1
Echdc1	1	1	1	1	1	1	1	1	1	1	1	1
AC151284.1	1	1	1	1	1	1	1	1	1	1	1	1
Dcaf12l1	1	1	1	1	1	1	1	1	1	1	1	1
Zdhhc14	1	1	1	1	1	1	1	1	1	1	1	1
Ffar3	1	1	1	1	1	1	1	1	1	1	1	1
Fras1	1	1	1	1	1	1	1	1	1	1	1	1
Scg2	1	1	1	1	1	1	1	1	1	1	1	1
Shisa2	1	1	1	1	1	1	1	1	1	1	1	1
Vipr2	1	1	1	1	1	1	1	1	1	1	1	1
Vwa3b	1	1	1	1	1	1	1	1	1	1	1	1
Ffar1	1	1	1	1	1	1	1	1	1	1	1	1
Ppp4r4	1	1	1	1	1	1	1	1	1	1	1	1
Fgf1	1	1	1	1	1	1	1	1	1	1	1	1
Adora1	1	1	1	1	1	1	1	1	1	1	1	1
Hapln1	1	1	1	1	1	1	1	1	1	1	1	1
Depdc7	1	1	1	1	1	1	1	1	1	1	1	1
Dpp10	1	1	1	1	1	1	1	1	1	1	1	1
Cldn34c1	1	1	1	1	1	1	1	1	1	1	1	1
Atp4a	1	1	1	1	1	1	1	1	1	1	1	1
Emid1	1	1	1	1	1	1	1	1	1	1	1	1
Ythdc2	1	1	1	1	1	1	1	1	1	1	1	1
Camkk1	1	1	1	1	1	1	1	1	1	1	1	1
Carmil3	1	1	1	1	1	1	1	1	1	1	1	1
Slc48a1	1	1	1	1	1	1	1	1	1	1	1	1
Dpysl2	1	1	1	1	1	1	1	1	1	1	1	1
Kcnj11	1	1	1	1	1	1	1	1	1	1	1	1
Arl10	1	1	1	1	1	1	1	1	1	1	1	1
Prkar1b	1	1	1	1	1	1	1	1	1	1	1	1
Gpr4	1	1	1	1	1	1	1	1	1	1	1	1
Lipt1	1	1	1	1	1	1	1	1	1	1	1	1
Ubl3	1	1	1	1	1	1	1	1	1	1	1	1
Vegfb	1	1	1	1	1	1	1	1	1	1	1	1
Erf	1	1	1	1	1	1	1	1	1	1	1	1
Ccdc184	1	1	1	1	1	1	1	1	1	1	1	1
Glis1	1	1	1	1	1	1	1	1	1	1	1	1
Pitpnm2	1	1	1	1	1	1	1	1	1	1	1	1
Barx2	1	1	1	1	1	1	1	1	1	1	1	1
Serpina10	1	1	1	1	1	1	1	1	1	1	1	1
Tmod1	1	1	1	1	1	1	1	1	1	1	1	1
Tmem59l	1	1	1	1	1	1	1	1	1	1	1	1
Dpf3	1	1	1	1	1	1	1	1	1	1	1	1
Pgf	1	1	1	1	1	1	1	1	1	1	1	1
Prrt1	1	1	1	1	1	1	1	1	1	1	1	1
Il17d	1	1	1	1	1	1	1	1	1	1	1	1
Zfp580	1	1	1	1	1	1	1	1	1	1	1	1
Insrr	1	1	1	1	1	1	1	1	1	1	1	1
Pcsk9	1	1	1	1	1	1	1	1	1	1	1	1
B4galnt4	1	1	1	1	1	1	1	1	1	1	1	1
Ttc34	1	1	1	1	1	1	1	1	1	1	1	1
Jph3	1	1	1	1	1	1	1	1	1	1	1	1
Mllt3	1	1	1	1	1	1	1	1	1	1	1	1
Gbf1	1	1	1	1	1	1	1	1	1	1	1	1
Tmed7	1	1	1	1	1	1	1	1	1	1	1	1
Sgsm2	1	1	1	1	1	1	1	1	1	1	1	1
Ube2o	1	1	1	1	1	1	1	1	1	1	1	1
Magee1	1	1	1	1	1	1	1	1	1	1	1	1
Cyfip2	1	1	1	1	1	1	1	1	1	1	1	1
Ap2a1	1	1	1	1	1	1	1	1	1	1	1	1
Cerk	1	1	1	1	1	1	1	1	1	1	1	1
Dop1a	1	1	1	1	1	1	1	1	1	1	1	1
Baiap3	1	1	1	1	1	1	1	1	1	1	1	1
Man2a2	1	1	1	1	1	1	1	1	1	1	1	1
Zer1	1	1	1	1	1	1	1	1	1	1	1	1
Hivep2	1	1	1	1	1	1	1	1	1	1	1	1
Tmem94	1	1	1	1	1	1	1	1	1	1	1	1
Nedd4l	1	1	1	1	1	1	1	1	1	1	1	1
Cabp7	1	1	1	1	1	1	1	1	1	1	1	1
Inppl1	1	1	1	1	1	1	1	1	1	1	1	1
Zkscan17	1	1	1	1	1	1	1	1	1	1	1	1
Ncoa2	1	1	1	1	1	1	1	1	1	1	1	1
Ppp1r9a	1	1	1	1	1	1	1	1	1	1	1	1
Tox3	1	1	1	1	1	1	1	1	1	1	1	1
Nfatc2	1	1	1	1	1	1	1	1	1	1	1	1
Pikfyve	1	1	1	1	1	1	1	1	1	1	1	1
Diras2	1	1	1	1	1	1	1	1	1	1	1	1
Ttc28	1	1	1	1	1	1	1	1	1	1	1	1
Siae	1	1	1	1	1	1	1	1	1	1	1	1
Lrba	1	1	1	1	1	1	1	1	1	1	1	1
Nf1	1	1	1	1	1	1	1	1	1	1	1	1
Itpr1	1	1	1	1	1	1	1	1	1	1	1	1
Bptf	1	1	1	1	1	1	1	1	1	1	1	1
Jmjd1c	1	1	1	1	1	1	1	1	1	1	1	1
Pdik1l	1	1	1	1	1	1	1	1	1	1	1	1
Casz1	1	1	1	1	1	1	1	1	1	1	1	1
Heg1	1	1	1	1	1	1	1	1	1	1	1	1
Fig4	1	1	1	1	1	1	1	1	1	1	1	1
Nbeal2	1	1	1	1	1	1	1	1	1	1	1	1
Cd24a	1	1	1	1	1	1	1	1	1	1	1	1
Pus1	1	1	1	1	1	1	1	1	1	1	1	1
Dclre1b	1	1	1	1	1	1	1	1	1	1	1	1
Tmprss2	1	1	1	1	1	1	1	1	1	1	1	1
Pgghg	1	1	1	1	1	1	1	1	1	1	1	1
Taf5l	1	1	1	1	1	1	1	1	1	1	1	1
Fat1	1	1	1	1	1	1	1	1	1	1	1	1
Itpr3	1	1	1	1	1	1	1	1	1	1	1	1
Bahcc1	1	1	1	1	1	1	1	1	1	1	1	1
Arhgef10l	1	1	1	1	1	1	1	1	1	1	1	1
Apcdd1	1	1	1	1	1	1	1	1	1	1	1	1
Cldn4	1	1	1	1	1	1	1	1	1	1	1	1
Sema4c	1	1	1	1	1	1	1	1	1	1	1	1
Ror1	1	1	1	1	1	1	1	1	1	1	1	1
Celf2	1	1	1	1	1	1	1	1	1	1	1	1
Plscr3	1	1	1	1	1	1	1	1	1	1	1	1
Csnk1e	1	1	1	1	1	1	1	1	1	1	1	1
Fut11	1	1	1	1	1	1	1	1	1	1	1	1
Txnrd3	1	1	1	1	1	1	1	1	1	1	1	1
Nedd9	1	1	1	1	1	1	1	1	1	1	1	1
Rhog	1	1	1	1	1	1	1	1	1	1	1	1
H2-T24	1	1	1	1	1	1	1	1	1	1	1	1
Sinhcaf	1	1	1	1	1	1	1	1	1	1	1	1
Cfl1	1	1	1	1	1	1	1	1	1	1	1	1
Eefsec	1	1	1	1	1	1	1	1	1	1	1	1
Zkscan5	1	1	1	1	1	1	1	1	1	1	1	1
Pdgfa	1	1	1	1	1	1	1	1	1	1	1	1
Neurog3	1	1	1	1	1	1	1	1	1	1	1	1
Zfp444	1	1	1	1	1	1	1	1	1	1	1	1
Zfp362	1	1	1	1	1	1	1	1	1	1	1	1
Zadh2	1	1	1	1	1	1	1	1	1	1	1	1
Sf3b4	1	1	1	1	1	1	1	1	1	1	1	1
Fbrs	1	1	1	1	1	1	1	1	1	1	1	1
Itpkb	1	1	1	1	1	1	1	1	1	1	1	1
Rab21	1	1	1	1	1	1	1	1	1	1	1	1
Btbd2	1	1	1	1	1	1	1	1	1	1	1	1
Mettl27	1	1	1	1	1	1	1	1	1	1	1	1
Tat	1	1	1	1	1	1	1	1	1	1	1	1
Gls2	1	1	1	1	1	1	1	1	1	1	1	1
Uox	1	1	1	1	1	1	1	1	1	1	1	1
Trp53i11	1	1	1	1	1	1	1	1	1	1	1	1
Rab10os	1	1	1	1	1	1	1	1	1	1	1	1
Sim1	1	1	1	1	1	1	1	1	1	1	1	1
Lpl	1	1	1	1	1	1	1	1	1	1	1	1
Mamld1	1	1	1	1	1	1	1	1	1	1	1	1
Lmo3	1	1	1	1	1	1	1	1	1	1	1	1
Hexim1	1	1	1	1	1	1	1	1	1	1	1	1
Edn3	1	1	1	1	1	1	1	1	1	1	1	1
Ctxn2	1	1	1	1	1	1	1	1	1	1	1	1
Fh1	1	1	1	1	1	1	1	1	1	1	1	1
Ddt	1	1	1	1	1	1	1	1	1	1	1	1
Osgepl1	1	1	1	1	1	1	1	1	1	1	1	1
Fam133b	1	1	1	1	1	1	1	1	1	1	1	1
ccdc198	1	1	1	1	1	1	1	1	1	1	1	1
Sgo1	1	1	1	1	1	1	1	1	1	1	1	1
Nthl1	1	1	1	1	1	1	1	1	1	1	1	1
Ankzf1	1	1	1	1	1	1	1	1	1	1	1	1
B4galt7	1	1	1	1	1	1	1	1	1	1	1	1
Prkag1	1	1	1	1	1	1	1	1	1	1	1	1
Camk1	1	1	1	1	1	1	1	1	1	1	1	1
Tdp2	1	1	1	1	1	1	1	1	1	1	1	1
Cdc123	1	1	1	1	1	1	1	1	1	1	1	1
Brcc3	1	1	1	1	1	1	1	1	1	1	1	1
Psmb7	1	1	1	1	1	1	1	1	1	1	1	1
Sod1	1	1	1	1	1	1	1	1	1	1	1	1
Pex13	1	1	1	1	1	1	1	1	1	1	1	1
Ift22	1	1	1	1	1	1	1	1	1	1	1	1
Copz2	1	1	1	1	1	1	1	1	1	1	1	1
Tmed5	1	1	1	1	1	1	1	1	1	1	1	1
Rpp14	1	1	1	1	1	1	1	1	1	1	1	1
Slc50a1	1	1	1	1	1	1	1	1	1	1	1	1
Rit1	1	1	1	1	1	1	1	1	1	1	1	1
Olfr330	1	1	1	1	1	1	1	1	1	1	1	1
Coq9	1	1	1	1	1	1	1	1	1	1	1	1
Yipf1	1	1	1	1	1	1	1	1	1	1	1	1
Hnrnpc	1	1	1	1	1	1	1	1	1	1	1	1
Clec4n	1	1	1	1	1	1	1	1	1	1	1	1
Ift74	1	1	1	1	1	1	1	1	1	1	1	1
Ccdc59	1	1	1	1	1	1	1	1	1	1	1	1
Arpc5	1	1	1	1	1	1	1	1	1	1	1	1
Tmem50a	1	1	1	1	1	1	1	1	1	1	1	1
Psph	1	1	1	1	1	1	1	1	1	1	1	1
Fam193b	1	1	1	1	1	1	1	1	1	1	1	1
Yeats4	1	1	1	1	1	1	1	1	1	1	1	1
Ostc	1	1	1	1	1	1	1	1	1	1	1	1
Fkbp2	1	1	1	1	1	1	1	1	1	1	1	1
Jtb	1	1	1	1	1	1	1	1	1	1	1	1
Taz	1	1	1	1	1	1	1	1	1	1	1	1
Dram2	1	1	1	1	1	1	1	1	1	1	1	1
Mtch2	1	1	1	1	1	1	1	1	1	1	1	1
Rpp40	1	1	1	1	1	1	1	1	1	1	1	1
Map1lc3b	1	1	1	1	1	1	1	1	1	1	1	1
Mrpl42	1	1	1	1	1	1	1	1	1	1	1	1
Mrpl51	1	1	1	1	1	1	1	1	1	1	1	1
Gatm	1	1	1	1	1	1	1	1	1	1	1	1
Amn1	1	1	1	1	1	1	1	1	1	1	1	1
Rcn2	1	1	1	1	1	1	1	1	1	1	1	1
D8Ertd738e	1	1	1	1	1	1	1	1	1	1	1	1
Ranbp1	1	1	1	1	1	1	1	1	1	1	1	1
Zfp950	1	1	1	1	1	1	1	1	1	1	1	1
Otoa	1	1	1	1	1	1	1	1	1	1	1	1
Cfap36	1	1	1	1	1	1	1	1	1	1	1	1
Clec7a	1	1	1	1	1	1	1	1	1	1	1	1
Mphosph10	1	1	1	1	1	1	1	1	1	1	1	1
Aass	1	1	1	1	1	1	1	1	1	1	1	1
Lypla1	1	1	1	1	1	1	1	1	1	1	1	1
Prpf39	1	1	1	1	1	1	1	1	1	1	1	1
Atpaf1	1	1	1	1	1	1	1	1	1	1	1	1
Cab39l	1	1	1	1	1	1	1	1	1	1	1	1
Arl6ip5	1	1	1	1	1	1	1	1	1	1	1	1
Hat1	1	1	1	1	1	1	1	1	1	1	1	1
Ip6k2	1	1	1	1	1	1	1	1	1	1	1	1
Jhy	1	1	1	1	1	1	1	1	1	1	1	1
Lamtor3	1	1	1	1	1	1	1	1	1	1	1	1
N4bp2l2	1	1	1	1	1	1	1	1	1	1	1	1
Bckdhb	1	1	1	1	1	1	1	1	1	1	1	1
Zfp874b	1	1	1	1	1	1	1	1	1	1	1	1
Rgs17	1	1	1	1	1	1	1	1	1	1	1	1
Golga7	1	1	1	1	1	1	1	1	1	1	1	1
Zfp442	1	1	1	1	1	1	1	1	1	1	1	1
C1qb	1	1	1	1	1	1	1	1	1	1	1	1
Retnla	1	1	1	1	1	1	1	1	1	1	1	1
Mcfd2	1	1	1	1	1	1	1	1	1	1	1	1
Yme1l1	1	1	1	1	1	1	1	1	1	1	1	1
Lap3	1	1	1	1	1	1	1	1	1	1	1	1
Ctnna2	1	1	1	1	1	1	1	1	1	1	1	1
Derl3	1	1	1	1	1	1	1	1	1	1	1	1
Dtd2	1	1	1	1	1	1	1	1	1	1	1	1
Slc39a11	1	1	1	1	1	1	1	1	1	1	1	1
Prss16	1	1	1	1	1	1	1	1	1	1	1	1
Pycr2	1	1	1	1	1	1	1	1	1	1	1	1
Tmem192	1	1	1	1	1	1	1	1	1	1	1	1
Pde4c	1	1	1	1	1	1	1	1	1	1	1	1
Nkiras1	1	1	1	1	1	1	1	1	1	1	1	1
Frmd5	1	1	1	1	1	1	1	1	1	1	1	1
Zdhhc22	1	1	1	1	1	1	1	1	1	1	1	1
Tmx2	1	1	1	1	1	1	1	1	1	1	1	1
Gps1	1	1	1	1	1	1	1	1	1	1	1	1
Tmed3	1	1	1	1	1	1	1	1	1	1	1	1
Tmigd3	1	1	1	1	1	1	1	1	1	1	1	1
Cthrc1	1	1	1	1	1	1	1	1	1	1	1	1
Nudt12	1	1	1	1	1	1	1	1	1	1	1	1
Rps4l	1	1	1	1	1	1	1	1	1	1	1	1
Zfp979	1	1	1	1	1	1	1	1	1	1	1	1
Manf	1	1	1	1	1	1	1	1	1	1	1	1
Cmas	1	1	1	1	1	1	1	1	1	1	1	1
Kdelr3	1	1	1	1	1	1	1	1	1	1	1	1
Rwdd3	1	1	1	1	1	1	1	1	1	1	1	1
Ogfod2	1	1	1	1	1	1	1	1	1	1	1	1
Mesd	1	1	1	1	1	1	1	1	1	1	1	1
Pcnp	1	1	1	1	1	1	1	1	1	1	1	1
Eif3j1	1	1	1	1	1	1	1	1	1	1	1	1
Wipi1	1	1	1	1	1	1	1	1	1	1	1	1
Stk32a	1	1	1	1	1	1	1	1	1	1	1	1
Arl15	1	1	1	1	1	1	1	1	1	1	1	1
Pros1	1	1	1	1	1	1	1	1	1	1	1	1
Pdzrn3	1	1	1	1	1	1	1	1	1	1	1	1
Agpat5	1	1	1	1	1	1	1	1	1	1	1	1
Eif1a	1	1	1	1	1	1	1	1	1	1	1	1
Rmdn2	1	1	1	1	1	1	1	1	1	1	1	1
Lgmn	1	1	1	1	1	1	1	1	1	1	1	1
Igkv6-20	1	1	1	1	1	1	1	1	1	1	1	1
Odc1	1	1	1	1	1	1	1	1	1	1	1	1
Gpr182	1	1	1	1	1	1	1	1	1	1	1	1
Mir6395	1	1	1	1	1	1	1	1	1	1	1	1
Cldn5	1	1	1	1	1	1	1	1	1	1	1	1
Socs2	1	1	1	1	1	1	1	1	1	1	1	1
Gfra3	1	1	1	1	1	1	1	1	1	1	1	1
Ehhadh	1	1	1	1	1	1	1	1	1	1	1	1
Abraxas2	1	1	1	1	1	1	1	1	1	1	1	1
Ebp	1	1	1	1	1	1	1	1	1	1	1	1
Syndig1	1	1	1	1	1	1	1	1	1	1	1	1
Gpc6	1	1	1	1	1	1	1	1	1	1	1	1
Rps6ka6	1	1	1	1	1	1	1	1	1	1	1	1
Gdi2	1	1	1	1	1	1	1	1	1	1	1	1
Ccdc9b	1	1	1	1	1	1	1	1	1	1	1	1
Ddx41	1	1	1	1	1	1	1	1	1	1	1	1
Pqbp1	1	1	1	1	1	1	1	1	1	1	1	1
Farsa	1	1	1	1	1	1	1	1	1	1	1	1
Dctn6	1	1	1	1	1	1	1	1	1	1	1	1
Tmem41a	1	1	1	1	1	1	1	1	1	1	1	1
Hcfc1r1	1	1	1	1	1	1	1	1	1	1	1	1
Zcchc17	1	1	1	1	1	1	1	1	1	1	1	1
Exosc4	1	1	1	1	1	1	1	1	1	1	1	1
Phf5a	1	1	1	1	1	1	1	1	1	1	1	1
Wdr83os	1	1	1	1	1	1	1	1	1	1	1	1
Ypel5	1	1	1	1	1	1	1	1	1	1	1	1
Uimc1	1	1	1	1	1	1	1	1	1	1	1	1
Cisd1	1	1	1	1	1	1	1	1	1	1	1	1
Cdkn1a	1	1	1	1	1	1	1	1	1	1	1	1
Rogdi	1	1	1	1	1	1	1	1	1	1	1	1
Cmtm8	1	1	1	1	1	1	1	1	1	1	1	1
Armc6	1	1	1	1	1	1	1	1	1	1	1	1
Trappc5	1	1	1	1	1	1	1	1	1	1	1	1
Glmp	1	1	1	1	1	1	1	1	1	1	1	1
Sigmar1	1	1	1	1	1	1	1	1	1	1	1	1
Sh3bp5l	1	1	1	1	1	1	1	1	1	1	1	1
Rsph3a	1	1	1	1	1	1	1	1	1	1	1	1
Map7d2	1	1	1	1	1	1	1	1	1	1	1	1
Nefh	1	1	1	1	1	1	1	1	1	1	1	1
Chst11	1	1	1	1	1	1	1	1	1	1	1	1
Gramd1c	1	1	1	1	1	1	1	1	1	1	1	1
Plekha8	1	1	1	1	1	1	1	1	1	1	1	1
Myo5a	1	1	1	1	1	1	1	1	1	1	1	1
Got1	1	1	1	1	1	1	1	1	1	1	1	1
Hltf	1	1	1	1	1	1	1	1	1	1	1	1
Abcb9	1	1	1	1	1	1	1	1	1	1	1	1
Arf1	1	1	1	1	1	1	1	1	1	1	1	1
Tbc1d15	1	1	1	1	1	1	1	1	1	1	1	1
Pak3	1	1	1	1	1	1	1	1	1	1	1	1
Sgtb	1	1	1	1	1	1	1	1	1	1	1	1
Ppfibp1	1	1	1	1	1	1	1	1	1	1	1	1
Abca8b	1	1	1	1	1	1	1	1	1	1	1	1
Rapgef5	1	1	1	1	1	1	1	1	1	1	1	1
Mkx	1	1	1	1	1	1	1	1	1	1	1	1
Mapk8ip3	1	1	1	1	1	1	1	1	1	1	1	1
Trmt1	1	1	1	1	1	1	1	1	1	1	1	1
Rcc1	1	1	1	1	1	1	1	1	1	1	1	1
Ifi47	1	1	1	1	1	1	1	1	1	1	1	1
Hdac1	1	1	1	1	1	1	1	1	1	1	1	1
Itm2a	1	1	1	1	1	1	1	1	1	1	1	1
Cdhr2	1	1	1	1	1	1	1	1	1	1	1	1
Cdkn2b	1	1	1	1	1	1	1	1	1	1	1	1
Retnlg	1	1	1	1	1	1	1	1	1	1	1	1
Thoc1	1	1	1	1	1	1	1	1	1	1	1	1
Fuz	1	1	1	1	1	1	1	1	1	1	1	1
Sh3d21	1	1	1	1	1	1	1	1	1	1	1	1
Nek3	1	1	1	1	1	1	1	1	1	1	1	1
Lacc1	1	1	1	1	1	1	1	1	1	1	1	1
Prepl	1	1	1	1	1	1	1	1	1	1	1	1
Enox1	1	1	1	1	1	1	1	1	1	1	1	1
Kcnk10	1	1	1	1	1	1	1	1	1	1	1	1
Adpgk	1	1	1	1	1	1	1	1	1	1	1	1
Lingo1	1	1	1	1	1	1	1	1	1	1	1	1
Rnf180	1	1	1	1	1	1	1	1	1	1	1	1
Esr1	1	1	1	1	1	1	1	1	1	1	1	1
Dnmt3bos	1	1	1	1	1	1	1	1	1	1	1	1
Map4	1	1	1	1	1	1	1	1	1	1	1	1
Ctnnbl1	1	1	1	1	1	1	1	1	1	1	1	1
Col5a2	1	1	1	1	1	1	1	1	1	1	1	1
Kctd18	1	1	1	1	1	1	1	1	1	1	1	1
Zfp410	1	1	1	1	1	1	1	1	1	1	1	1
Poli	1	1	1	1	1	1	1	1	1	1	1	1
Rps6ka5	1	1	1	1	1	1	1	1	1	1	1	1
Insig2	1	1	1	1	1	1	1	1	1	1	1	1
Atp8a1	1	1	1	1	1	1	1	1	1	1	1	1
Gpa33	1	1	1	1	1	1	1	1	1	1	1	1
Syt10	1	1	1	1	1	1	1	1	1	1	1	1
Hip1r	1	1	1	1	1	1	1	1	1	1	1	1
Gle1	1	1	1	1	1	1	1	1	1	1	1	1
Plrg1	1	1	1	1	1	1	1	1	1	1	1	1
Fam189a2	1	1	1	1	1	1	1	1	1	1	1	1
Zfp426	1	1	1	1	1	1	1	1	1	1	1	1
Nkx6-2	1	1	1	1	1	1	1	1	1	1	1	1
Mrpl47	1	1	1	1	1	1	1	1	1	1	1	1
Zfp934	1	1	1	1	1	1	1	1	1	1	1	1
Mapre1	1	1	1	1	1	1	1	1	1	1	1	1
Epcam	1	1	1	1	1	1	1	1	1	1	1	1
Ephb6	1	1	1	1	1	1	1	1	1	1	1	1
Spats2l	1	1	1	1	1	1	1	1	1	1	1	1
Prelid1	1	1	1	1	1	1	1	1	1	1	1	1
Cyb5a	1	1	1	1	1	1	1	1	1	1	1	1
Tmem183a	1	1	1	1	1	1	1	1	1	1	1	1
Gna13	1	1	1	1	1	1	1	1	1	1	1	1
Klc4	1	1	1	1	1	1	1	1	1	1	1	1
Dbr1	1	1	1	1	1	1	1	1	1	1	1	1
Nabp1	1	1	1	1	1	1	1	1	1	1	1	1
Acat2	1	1	1	1	1	1	1	1	1	1	1	1
Ythdc1	1	1	1	1	1	1	1	1	1	1	1	1
Gsk3a	1	1	1	1	1	1	1	1	1	1	1	1
Acap3	1	1	1	1	1	1	1	1	1	1	1	1
Dph2	1	1	1	1	1	1	1	1	1	1	1	1
Gga1	1	1	1	1	1	1	1	1	1	1	1	1
Pigs	1	1	1	1	1	1	1	1	1	1	1	1
Tmem231	1	1	1	1	1	1	1	1	1	1	1	1
Rab11b	1	1	1	1	1	1	1	1	1	1	1	1
Bsdc1	1	1	1	1	1	1	1	1	1	1	1	1
Cdc23	1	1	1	1	1	1	1	1	1	1	1	1
Uck2	1	1	1	1	1	1	1	1	1	1	1	1
Nup50	1	1	1	1	1	1	1	1	1	1	1	1
Ppm1a	1	1	1	1	1	1	1	1	1	1	1	1
Pgrmc2	1	1	1	1	1	1	1	1	1	1	1	1
Nbn	1	1	1	1	1	1	1	1	1	1	1	1
Map2k2	1	1	1	1	1	1	1	1	1	1	1	1
Crtap	1	1	1	1	1	1	1	1	1	1	1	1
Oxsr1	1	1	1	1	1	1	1	1	1	1	1	1
Prpf38b	1	1	1	1	1	1	1	1	1	1	1	1
Gnao1	1	1	1	1	1	1	1	1	1	1	1	1
Tmem127	1	1	1	1	1	1	1	1	1	1	1	1
Klhl22	1	1	1	1	1	1	1	1	1	1	1	1
Ap3s2	1	1	1	1	1	1	1	1	1	1	1	1
Ptpn11	1	1	1	1	1	1	1	1	1	1	1	1
Smpd1	1	1	1	1	1	1	1	1	1	1	1	1
Sez6l2	1	1	1	1	1	1	1	1	1	1	1	1
Ppp2r1b	1	1	1	1	1	1	1	1	1	1	1	1
Snip1	1	1	1	1	1	1	1	1	1	1	1	1
Vps39	1	1	1	1	1	1	1	1	1	1	1	1
Ccser1	1	1	1	1	1	1	1	1	1	1	1	1
Scarb1	1	1	1	1	1	1	1	1	1	1	1	1
Tmem8	1	1	1	1	1	1	1	1	1	1	1	1
Trpm2	1	1	1	1	1	1	1	1	1	1	1	1
Rufy1	1	1	1	1	1	1	1	1	1	1	1	1
Smim13	1	1	1	1	1	1	1	1	1	1	1	1
Cyp51	1	1	1	1	1	1	1	1	1	1	1	1
Rab38	1	1	1	1	1	1	1	1	1	1	1	1
Lcmt2	1	1	1	1	1	1	1	1	1	1	1	1
Ktn1	1	1	1	1	1	1	1	1	1	1	1	1
Srsf1	1	1	1	1	1	1	1	1	1	1	1	1
Plat	1	1	1	1	1	1	1	1	1	1	1	1
Slco2b1	1	1	1	1	1	1	1	1	1	1	1	1
Cdh11	1	1	1	1	1	1	1	1	1	1	1	1
Ms4a4d	1	1	1	1	1	1	1	1	1	1	1	1
Cpe	1	1	1	1	1	1	1	1	1	1	1	1
Ube2l3	1	1	1	1	1	1	1	1	1	1	1	1
Hnrnph2	1	1	1	1	1	1	1	1	1	1	1	1
Htatsf1	1	1	1	1	1	1	1	1	1	1	1	1
Bmp6	1	1	1	1	1	1	1	1	1	1	1	1
Ltbp4	1	1	1	1	1	1	1	1	1	1	1	1
Zfp64	1	1	1	1	1	1	1	1	1	1	1	1
Tspan9	1	1	1	1	1	1	1	1	1	1	1	1
Krr1	1	1	1	1	1	1	1	1	1	1	1	1
Nr4a3	1	1	1	1	1	1	1	1	1	1	1	1
Btg2	1	1	1	1	1	1	1	1	1	1	1	1
Cacng4	1	1	1	1	1	1	1	1	1	1	1	1
Hist1h1c	1	1	1	1	1	1	1	1	1	1	1	1
Zkscan3	1	1	1	1	1	1	1	1	1	1	1	1
Wdr83	1	1	1	1	1	1	1	1	1	1	1	1
Serpine1	1	1	1	1	1	1	1	1	1	1	1	1
Capns1	1	1	1	1	1	1	1	1	1	1	1	1
Hmga1	1	1	1	1	1	1	1	1	1	1	1	1
Rce1	1	1	1	1	1	1	1	1	1	1	1	1
Zfp691	1	1	1	1	1	1	1	1	1	1	1	1
Lhfpl5	1	1	1	1	1	1	1	1	1	1	1	1
Cebpg	1	1	1	1	1	1	1	1	1	1	1	1
Rnf187	1	1	1	1	1	1	1	1	1	1	1	1
Panx2	1	1	1	1	1	1	1	1	1	1	1	1
Mbd6	1	1	1	1	1	1	1	1	1	1	1	1
Igfbp7	1	1	1	1	1	1	1	1	1	1	1	1
Dact2	1	1	1	1	1	1	1	1	1	1	1	1
Paip1	1	1	1	1	1	1	1	1	1	1	1	1
Aes	1	1	1	1	1	1	1	1	1	1	1	1
Igkv5-37	1	1	1	1	1	1	1	1	1	1	1	1
Faim	1	1	1	1	1	1	1	1	1	1	1	1
Dnajc7	1	1	1	1	1	1	1	1	1	1	1	1
Gm17530	1	1	1	1	1	1	1	1	1	1	1	1
Vapa	1	1	1	1	1	1	1	1	1	1	1	1
Snw1	1	1	1	1	1	1	1	1	1	1	1	1
Sema7a	1	1	1	1	1	1	1	1	1	1	1	1
Chl1	1	1	1	1	1	1	1	1	1	1	1	1
Slc30a1	1	1	1	1	1	1	1	1	1	1	1	1

[truncated: 76 more sheets: Heat maps1_HID2, Heat maps1_HID3, Heat maps_HID4, Heat maps_HID5, Heat maps1_HID4, Heat maps1_HID5, Heat maps1_HID6, Heat maps1_HID7, Heat maps2_HID, Heat maps2_HID1, Heat maps2_HID8, Heat maps2_HID9, Heat maps3_HID2, Heat maps3_HID3, Heat maps1_HID19, Heat maps1_HID20, Heat maps_HID23, Heat maps_HID24, Heat maps_HID25, Heat maps_HID26 …]
